# Supplementary material
Source: Research Square preprint supplement (doi:10.21203/rs.3.rs-9953096/v1)
Supplement: Supplementary file 1 [file 0b06528ec2e167ec7a7c6852.docx]

**The structural basis of SRSF6-mediated splicing decisions governed by tandem-domain RNA recognition and RS-domain tuning**

Julian von Ehr1,2,3, Sunesh Sethumadhavan3,4, Friederike E. Schubert2,5, Sophie M. Korn6,7, Natalie Meixner1, Lasse Oberstrass8, Bernd Simon9, Julia E. Weigand8,10, Gerhard Hummer3,5,11, Michaela Müller-McNicoll3,4,5*, and Andreas Schlundt1,3,6*

1Institute for Molecular Biosciences and Biomolecular Resonance Center (BMRZ), Goethe University Frankfurt, Max-von-Laue-Str. 7-9, 60438 Frankfurt, Germany.

2IMPRS on Cellular Biophysics, Max-von-Laue-Str. 3, 7-9, 60438 Frankfurt, Germany.

3Cluster of Excellence SubCellular Architecture of Life (SCALE), Goethe University Frankfurt, Frankfurt, Germany

4Institute for Molecular Biosciences, Goethe University Frankfurt, Max-von-Laue-Str. 13, 60438 Frankfurt, Germany.

5Department of Theoretical Biophysics, Max Planck Institute of Biophysics, Max-von-Laue-Straße 3, 60438 Frankfurt am Main, Germany

6University of Greifswald, Institute of Biochemistry, Felix-Hausdorff-Str. 4, 17489 Greifswald, Germany.

7Department of Biochemistry and Molecular Biophysics, Columbia University, New York, NY 10032, United States.

8Marburg University, Department of Pharmacy, Institute of Pharmaceutical Chemistry, Marbacher Weg 6, 35037 Marburg, Germany.

9Department of Molecular Biology and Biophysics, University of Connecticut Health Center, 263 Farmington Avenue, Farmington, CT 06030, USA.

10Marburg University, Center for Synthetic Microbiology (SYNMIKRO), Karl-von-Frisch-Str. 14, 35043 Marburg, Germany

11Institute of Biophysics, Goethe University Frankfurt, 60438 Frankfurt am Main, Germany

*To whom correspondence should be addressed: mueller-mcnicoll@bio.uni-frankfurt.de, [andreas.schlundt@uni-greifswald.de](mailto:andreas.schlundt@uni-greifswald.de)

# Supplementary Figures


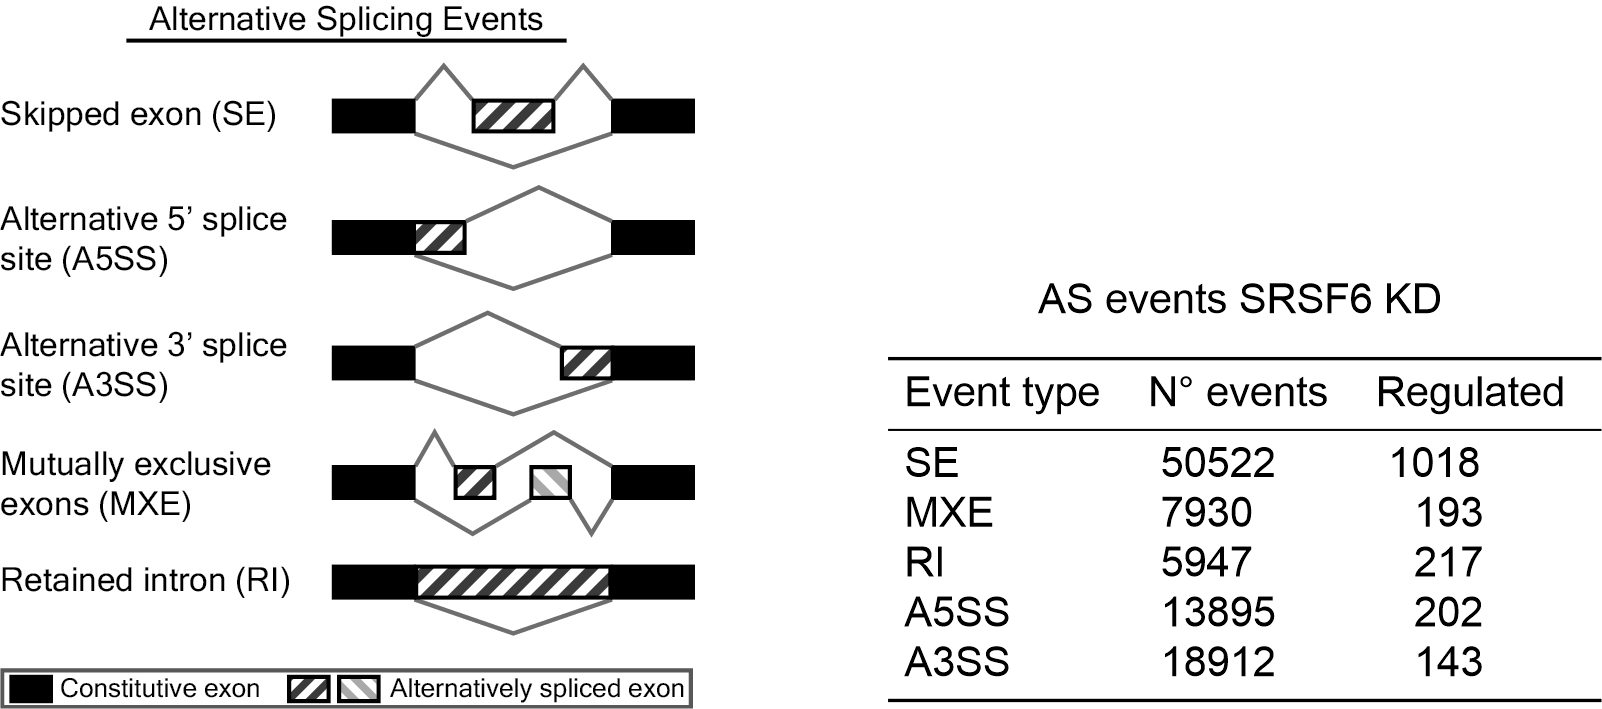


Supplementary Figure : Alternative splicing events in SRSF6 KD cells.

Left: Alternative Splicing Events identified by rMATS, using an improved version of the generalized linear mixed model to detect differential AS from RNA-seq data with replicates (Shen et al., 2014). It accounts for exon-specific sequencing coverage in individual samples as well as variation in exon splicing levels among replicates.Right: Alternative splicing events in HeLa cells upon SRSF6 KD identified using rMATS applying a cut-off of FDR<0.1and ΔPSI > 5%.


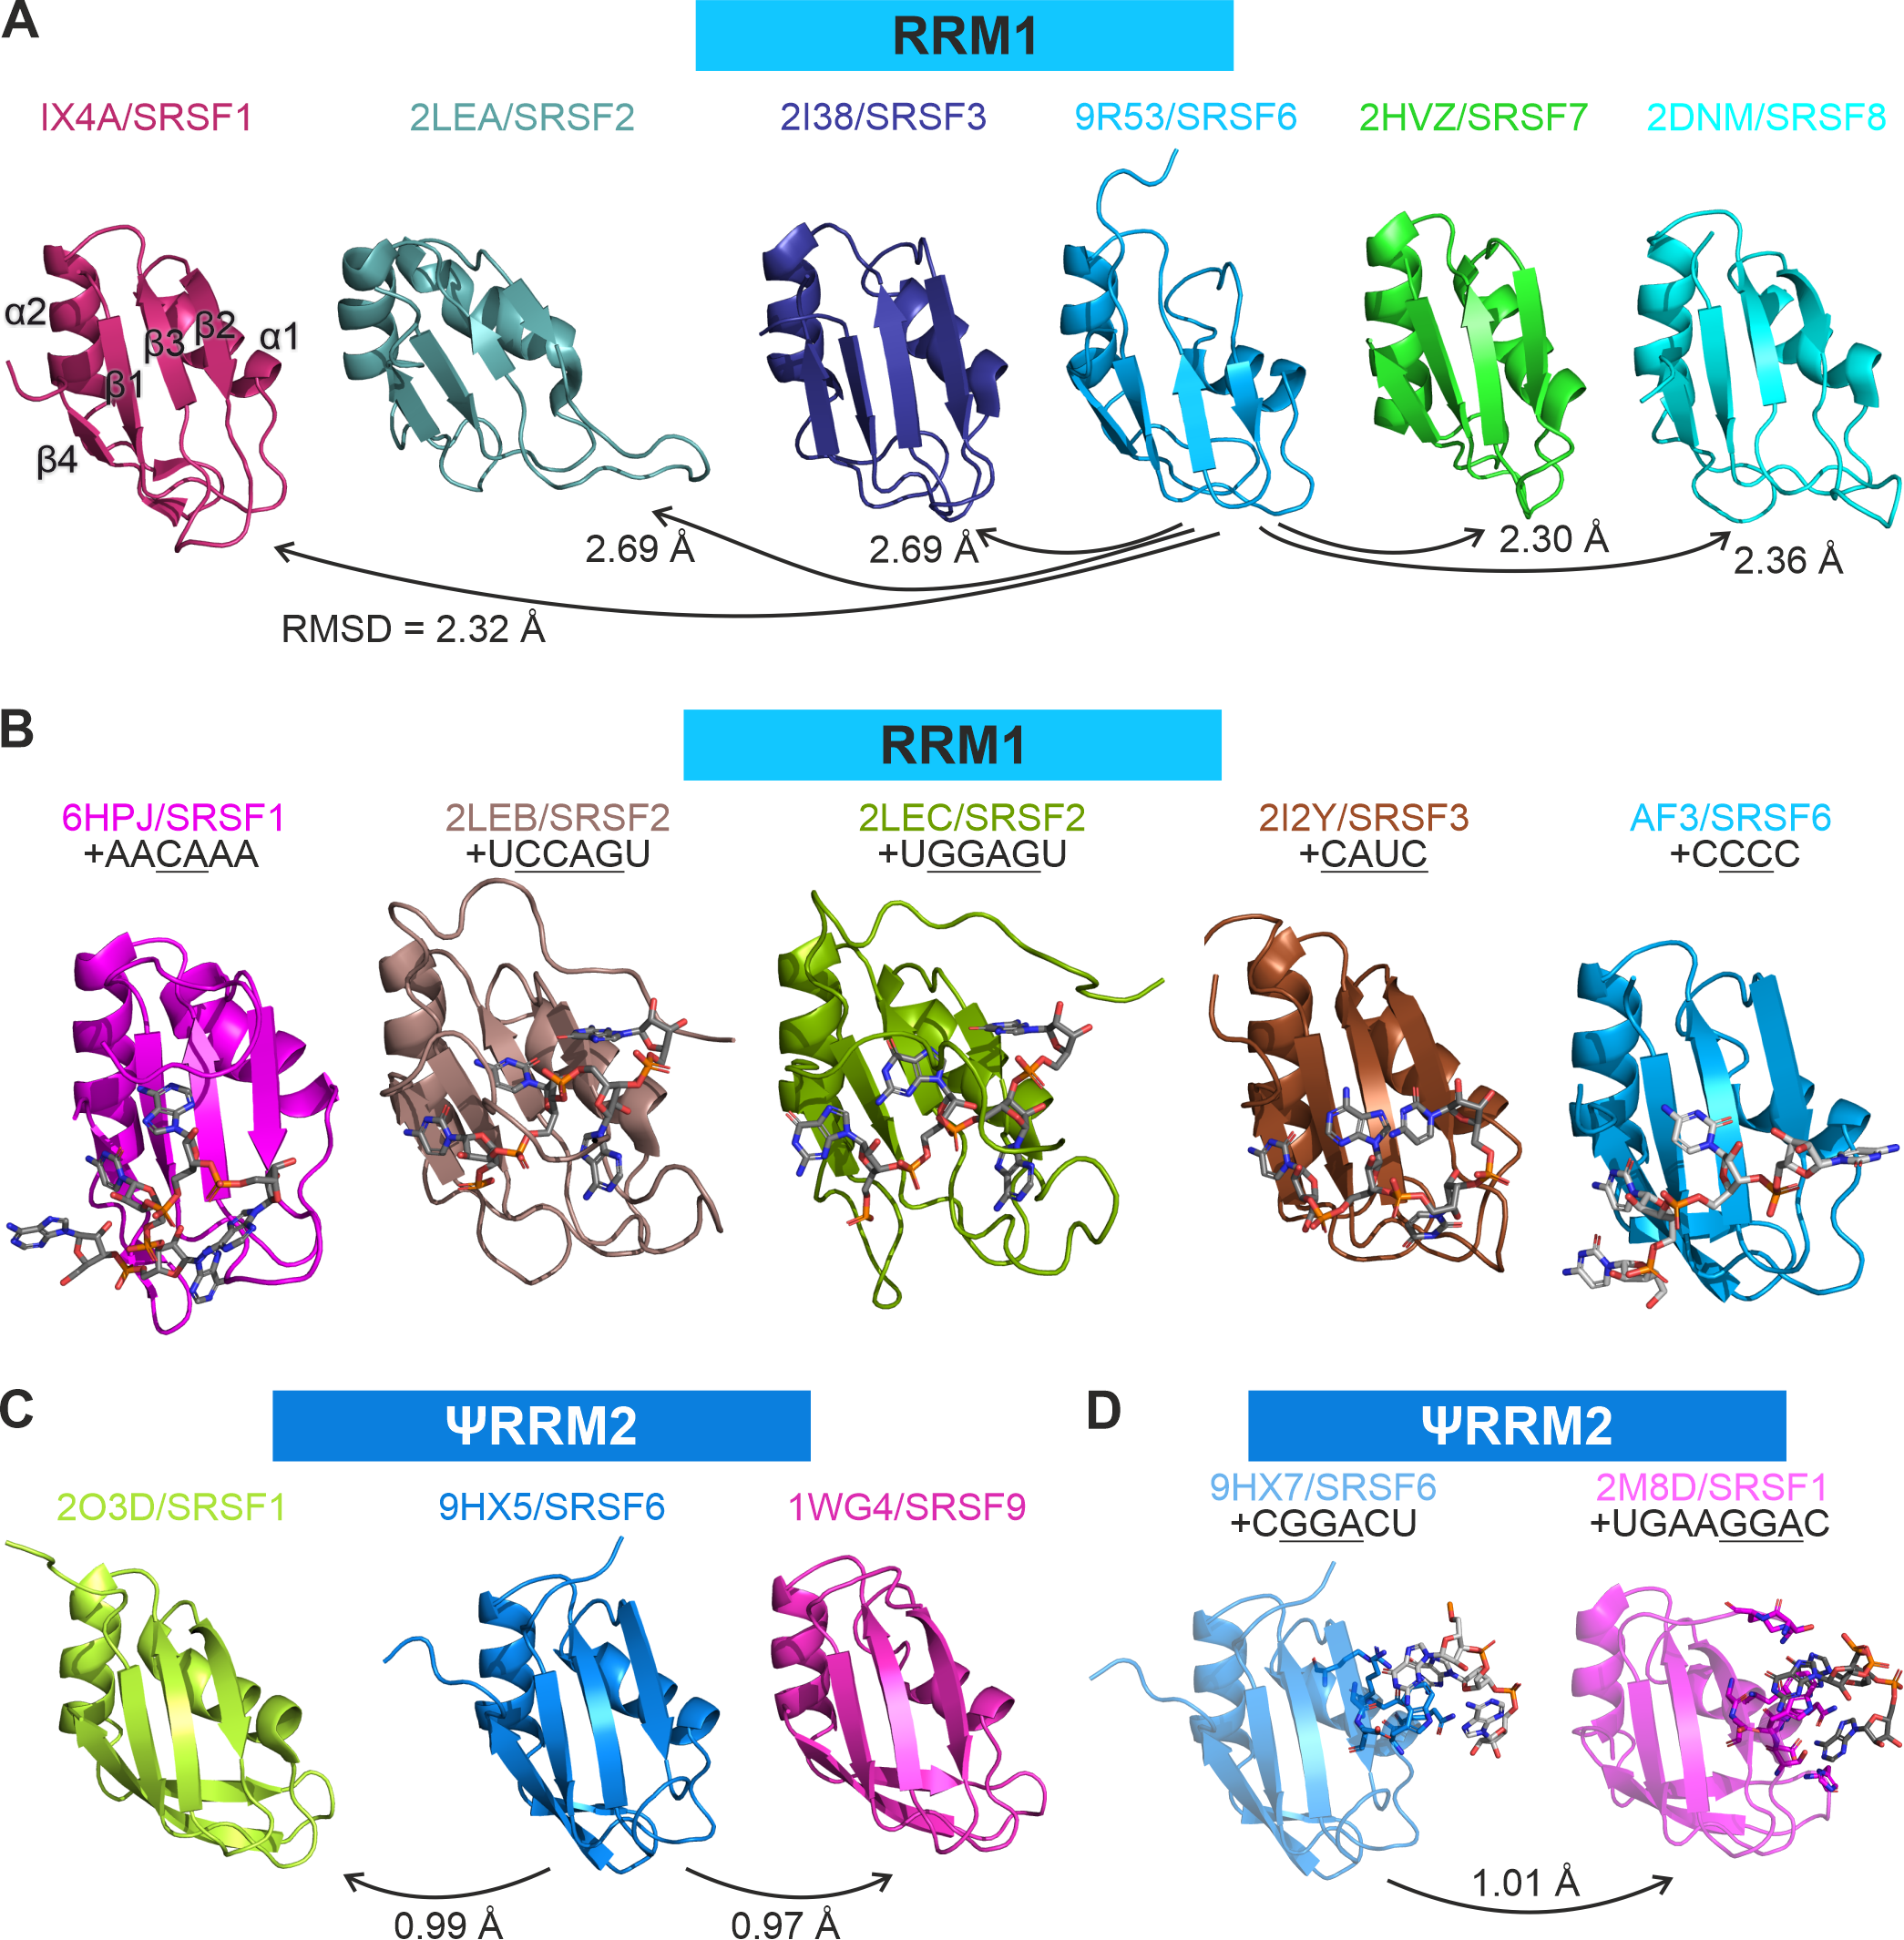


Supplementary Figure : Comparison of available structures of SRSF proteins.

A: Comparison of RRM1 apo structures with their respective PDB IDs and the SRSF protein given above each structure. RMSDs for each structure in comparison to SRSF6 RRM1 are highlighted. Secondary structure elements are labeled for SRSF1 RRM1 and are the same for all other structures. B: Comparison of RRM1 structures in complex with RNA. RNA sequences used are shown with bound nucleotides underlined. C: Comparison of ΨRRM2 apo structures. D: Comparison of ΨRRM2 structures in complex with RNA. All structures have been aligned before rendering the image to assure identical orientation.


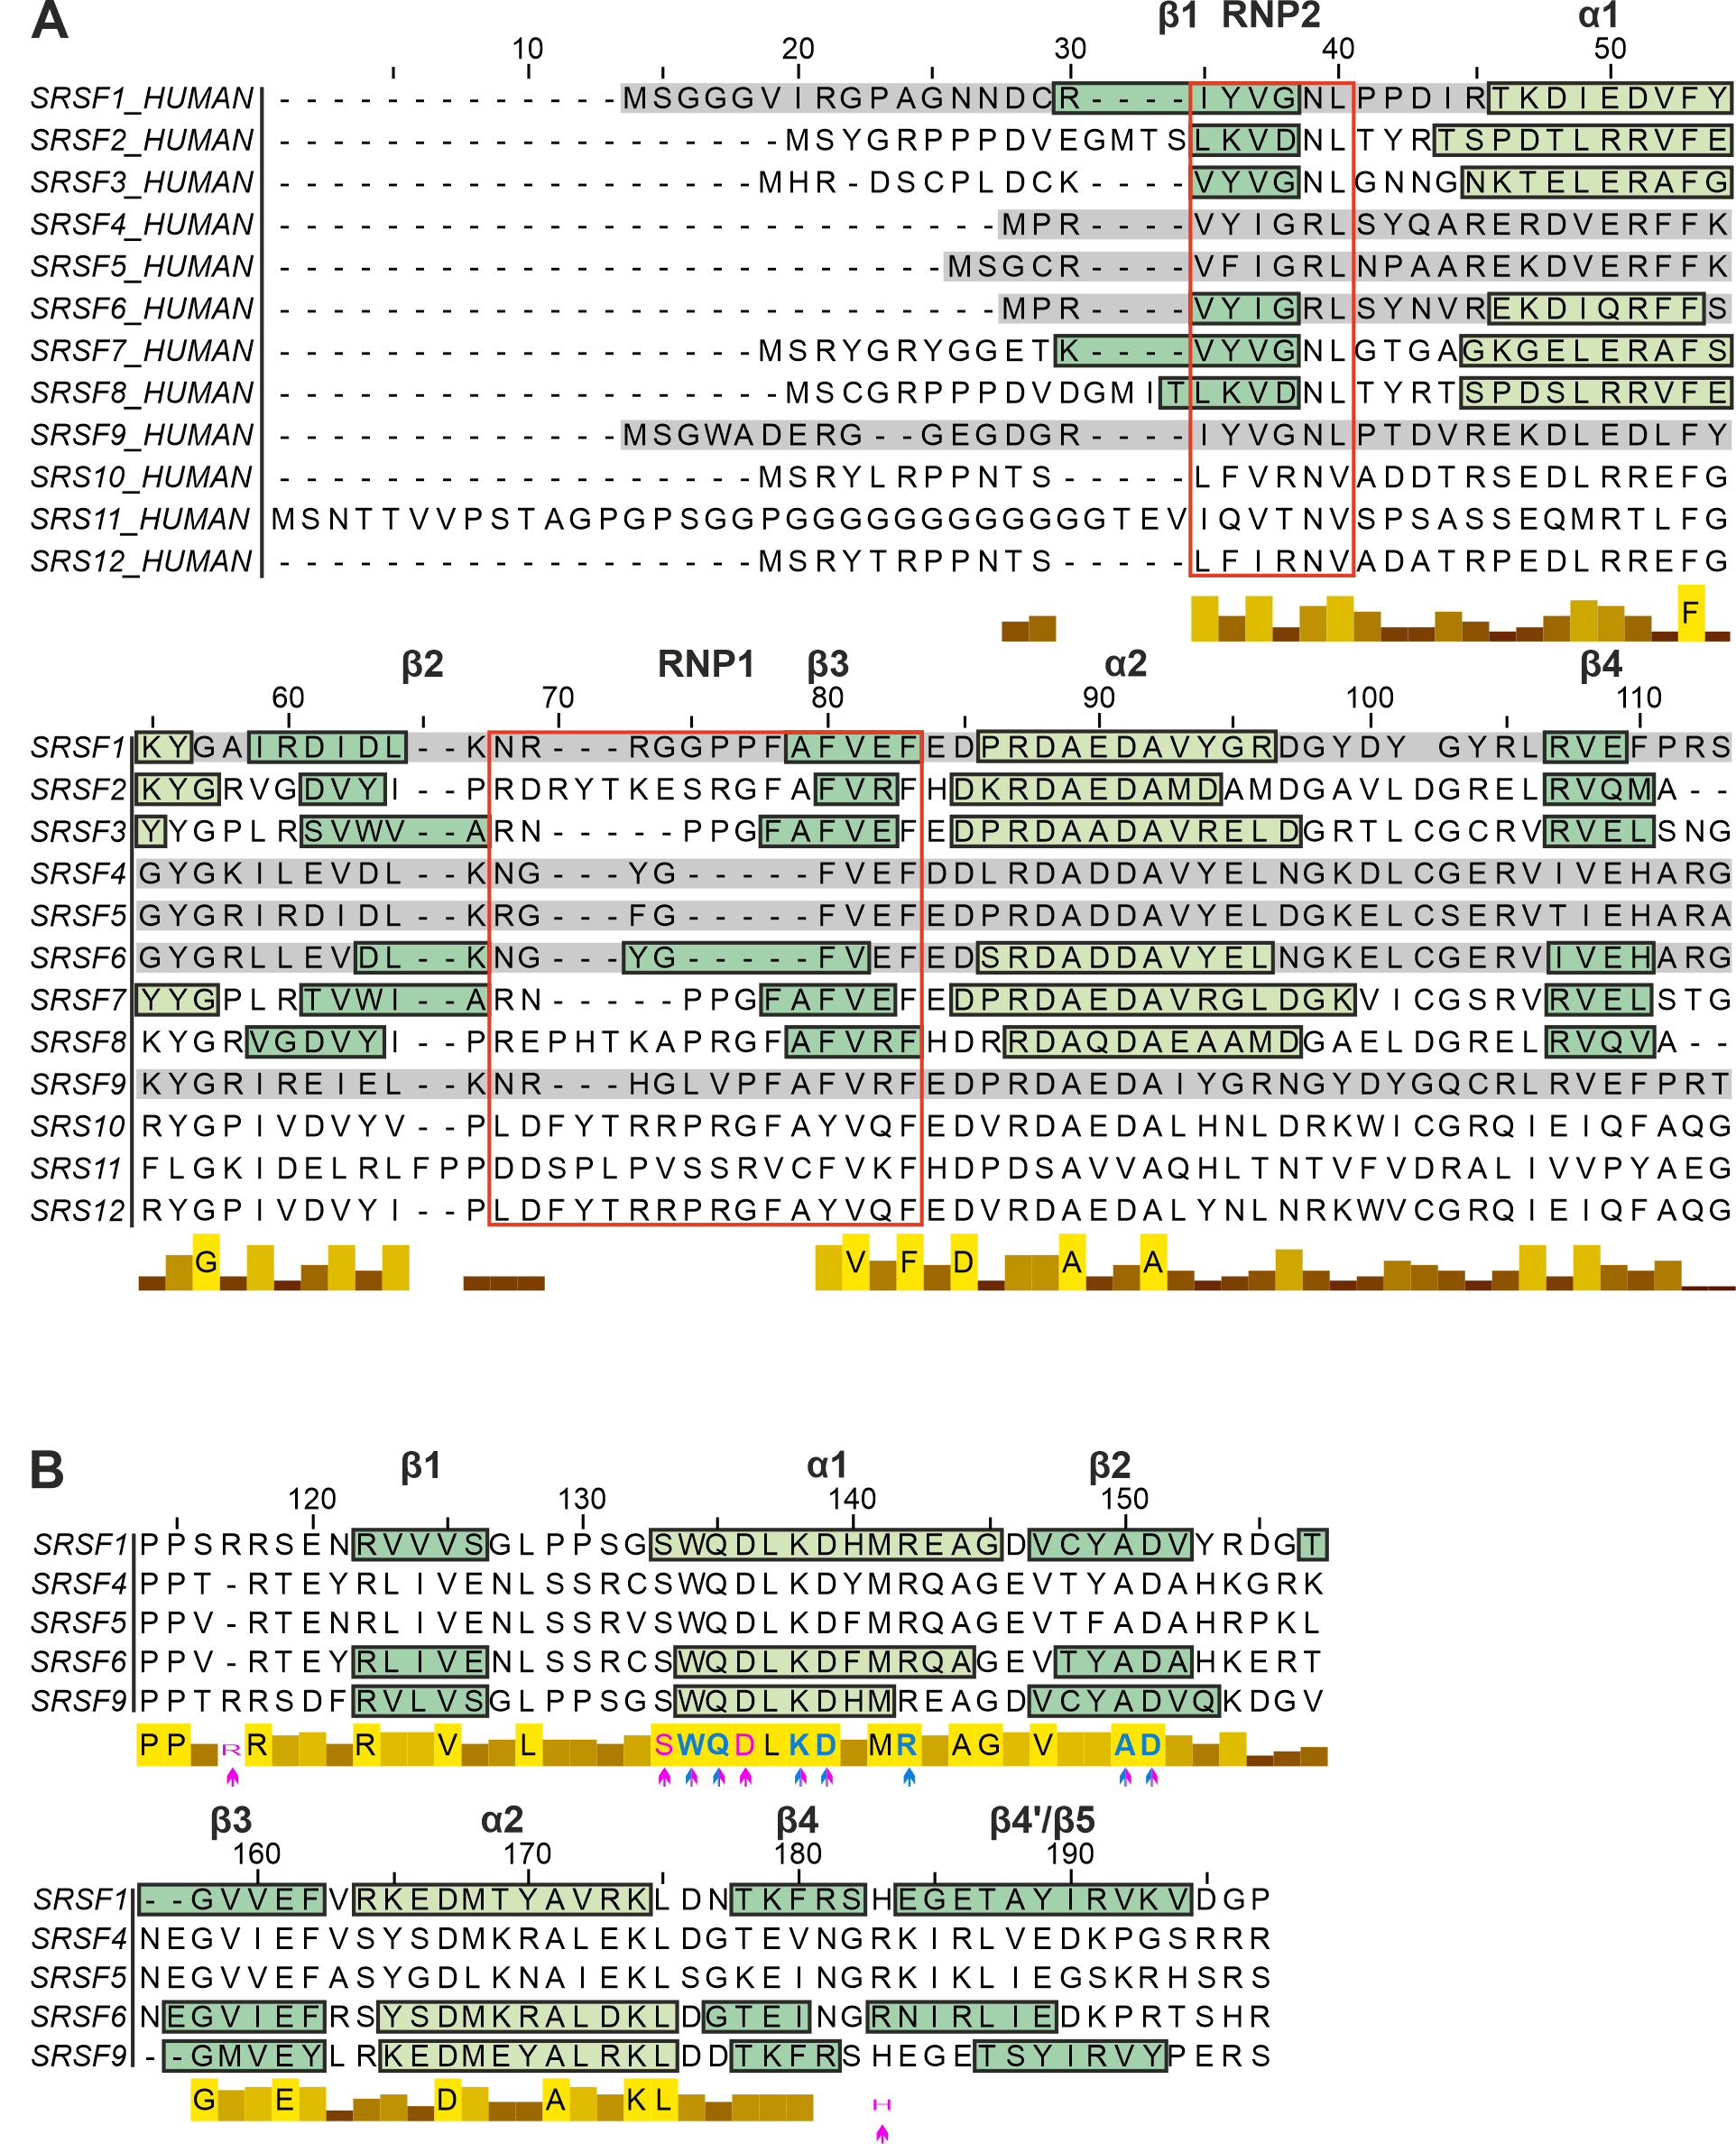


Supplementary Figure : Sequence alignment of SRSF RRM1 (A) and ΨRRM2 (B).
A: Sequence alignment of all twelve human SRSF proteins. Sequence numbering is based on SRSF11. Sequences of SRSF proteins that contain a second RRM are highlighted in gray. Secondary structure elements are highlighted and labeled according to PDB IDs 1X4A (SRSF1), 2LEA (SRSF2), 2I38 (SRSF3), 9R53 (SRSF6), 2HVZ (SRSF7) and 2DNM (SRSF8). RNPs are highlighted in red boxes according to the RNP consensus motifs applied for SRSF6. B: Sequence alignment of ΨRRM2. Sequence numbering is based on SRSF1. Secondary structure elements are highlighted and labeled according to PDB IDs 2O3D (SRSF1), 9HX5 (SRSF6) and 1WG4 (SRSF9). Arrows highlight residues of SRSF1 (magenta) and SRSF6 (blue) that directly interact with “GGA” RNA. The bars below sequences indicate sequence conservation, with letters in bars representing 100 % identity between all twelve/five members. Alignments were performed in Jalview 2.11.5.0.


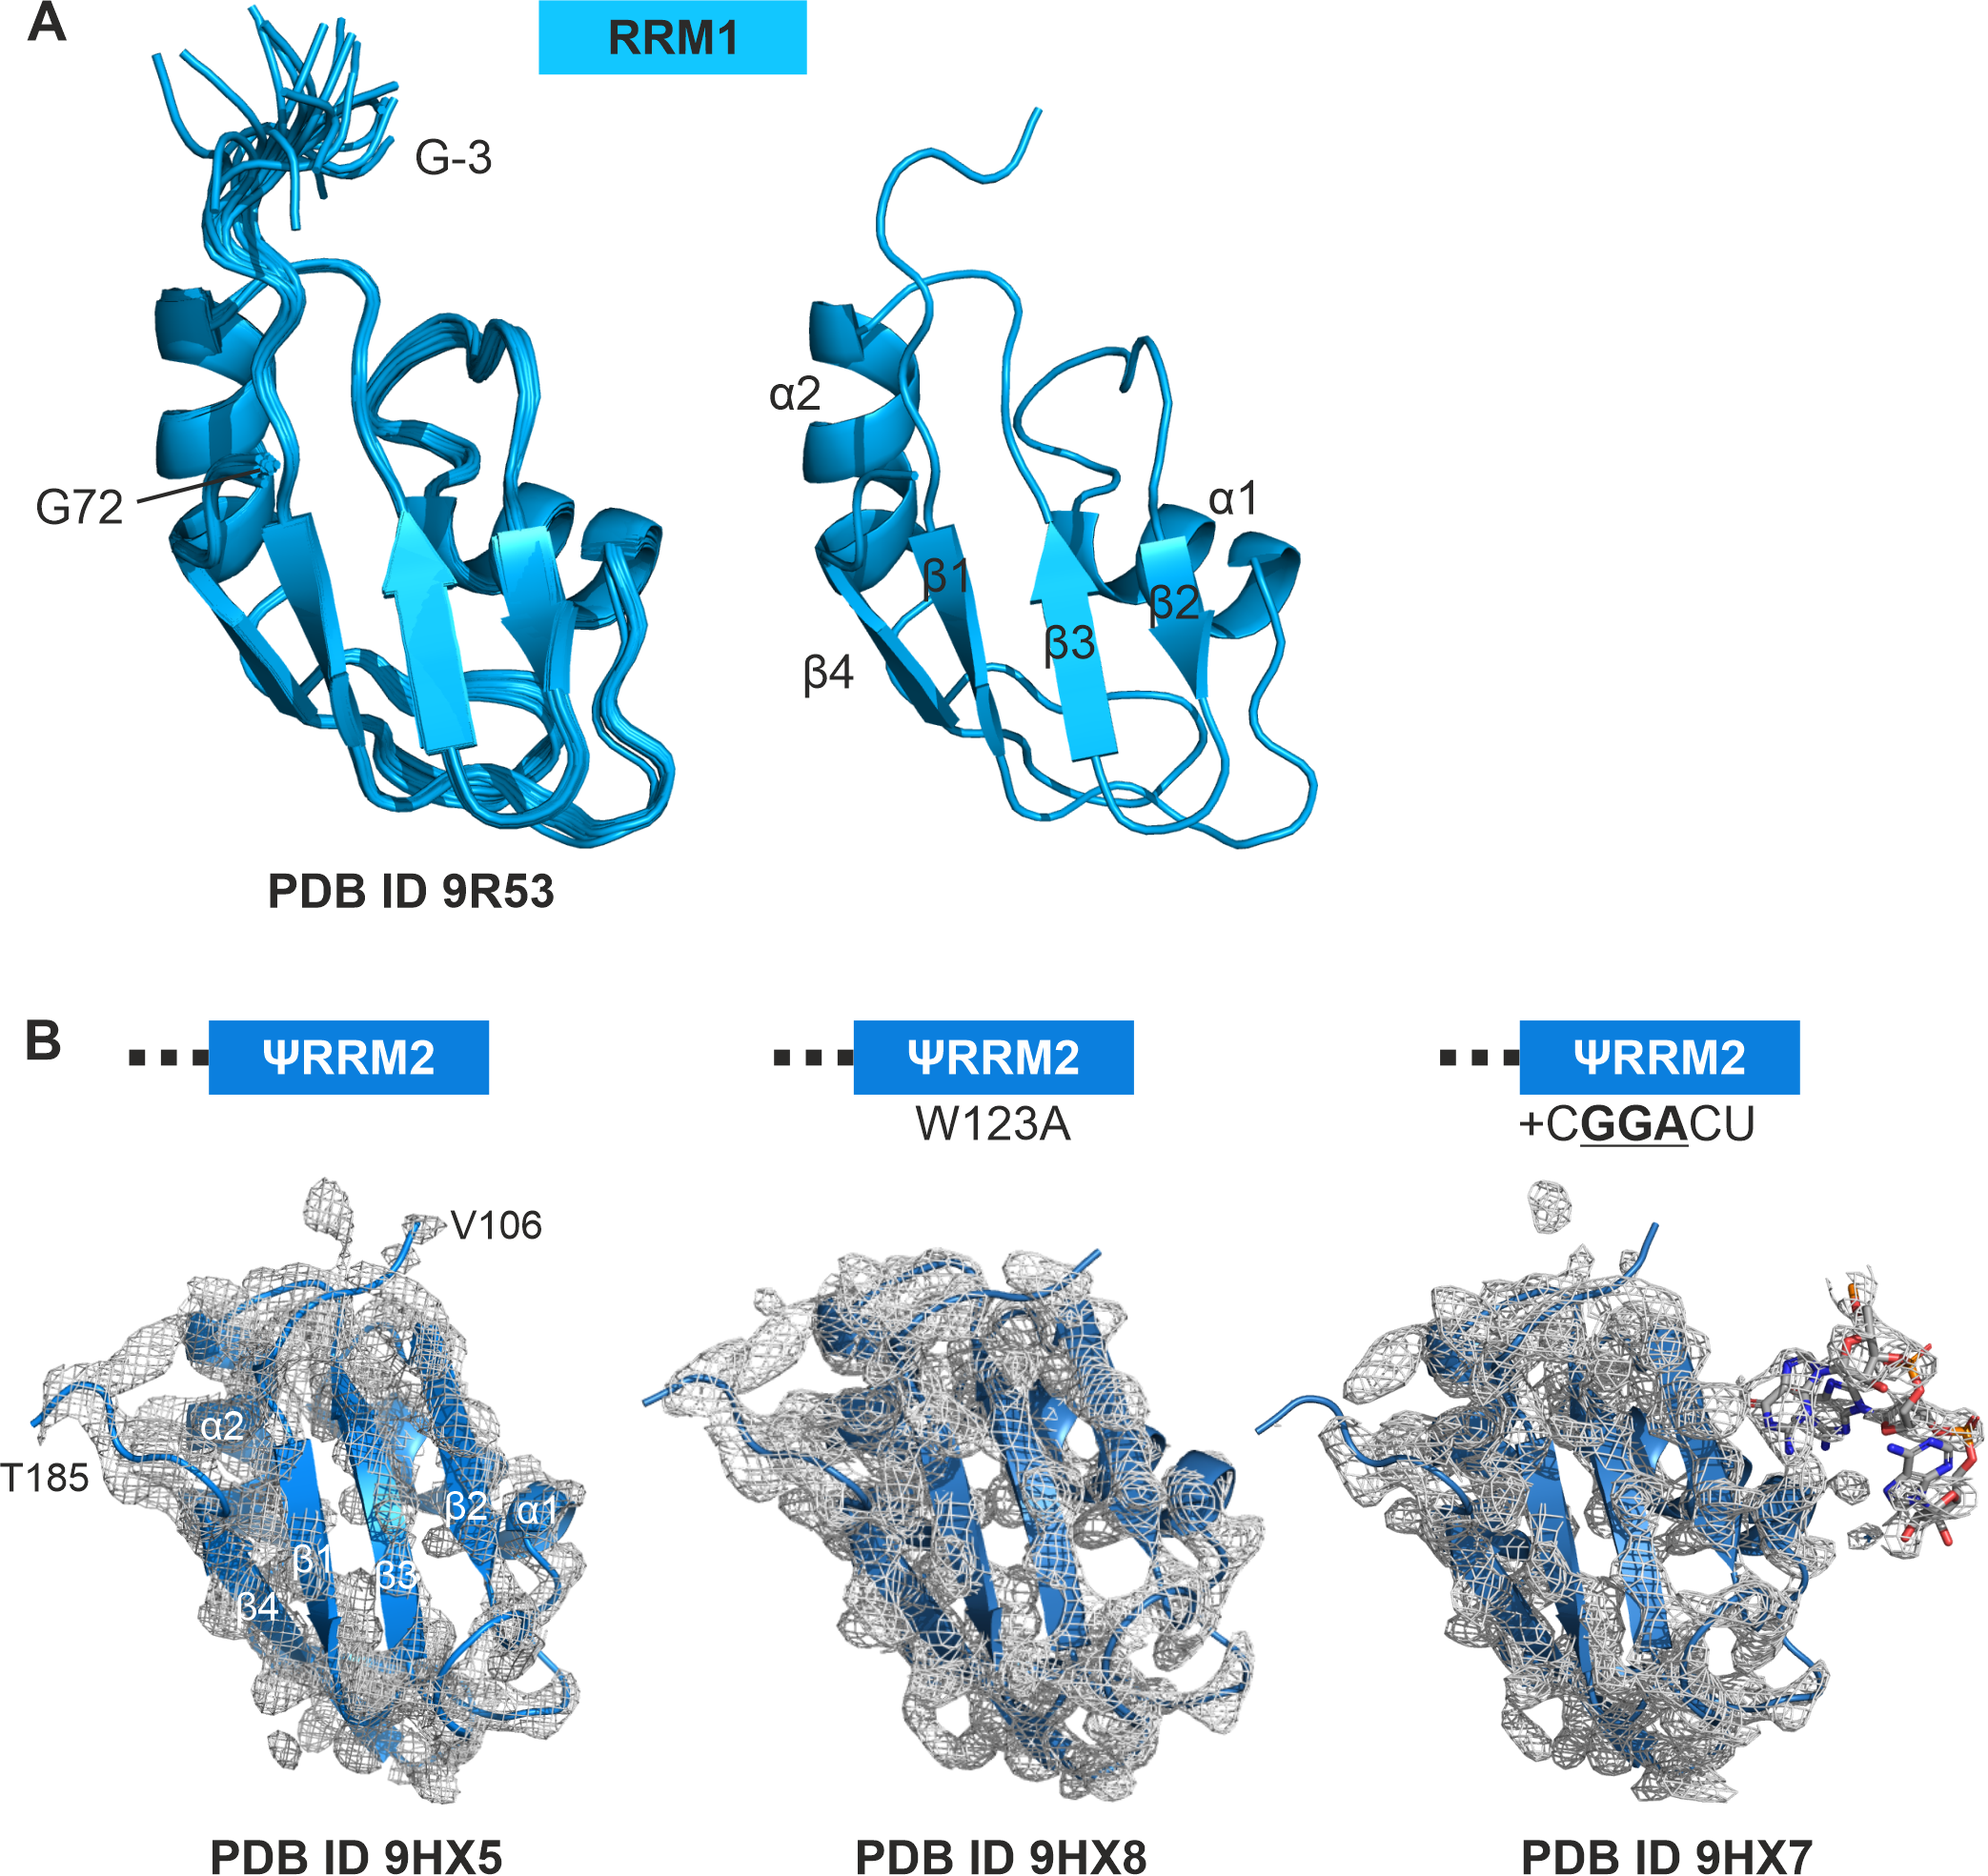


Supplementary Figure : Structures of SRSF6 RRM1 (A) and ΨRRM2 (B).

A: Structural ensemble of 20 lowest energy NMR structures of SRSF6 RRM1 with one representative structure highlighted. N- and C-terminus as well as secondary structure elements are highlighted. B: Crystal structures of SRSF6 ΨRRM2 in its apo state (left) as a W123A mutant (middle) and in complex with CGGACU RNA (right). The electron density (2FoFc map) is shown at σ=1.5 for the protein and σ=2.0 for the RNA. N- and C-terminus as well as secondary structure elements are highlighted for the apo protein.


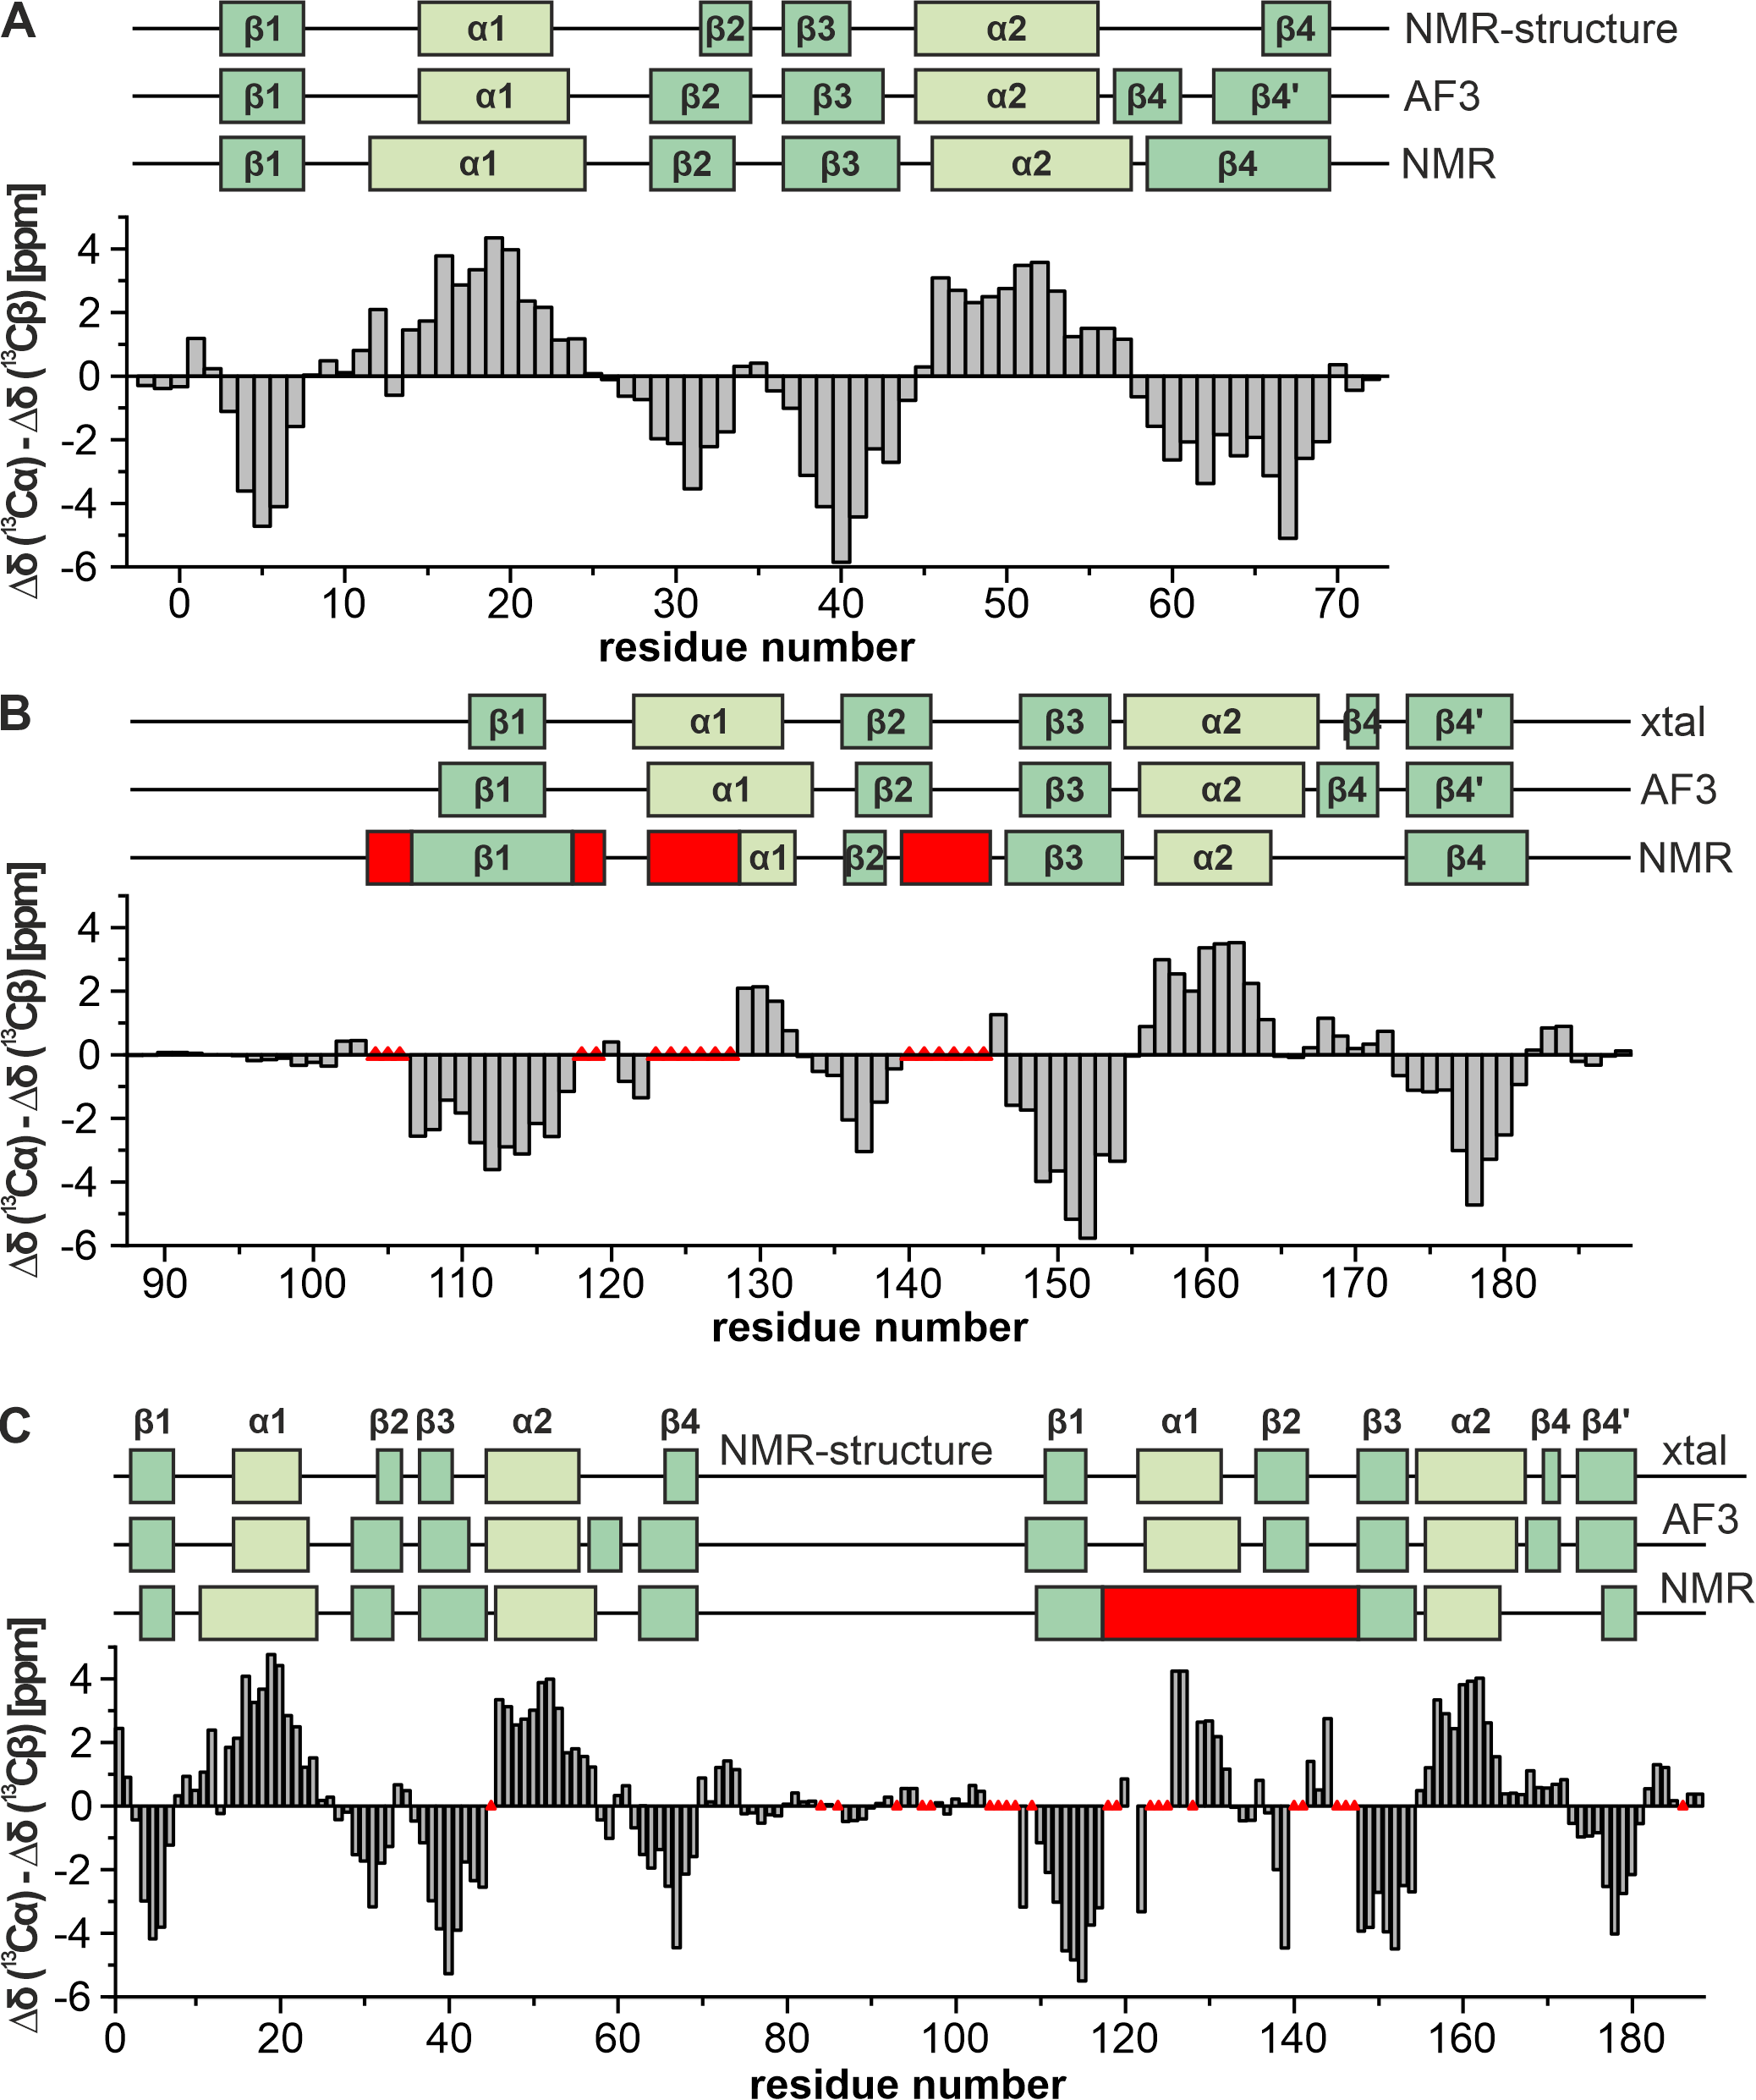


Supplementary Figure : Secondary structure comparison of RRM1 (A) and ΨRRM2 (B) and tandem RRM (C).

Secondary structure derived from SCS data 1 is plotted above each graph in two different green tones for β-strands and α-helices. Red triangles and boxes indicate areas of missing assignments and therefore uncertainty in secondary structures. A: Secondary structure comparison of RRM1 NMR secondary chemical shift data, AF3 data and the here presented NMR structure (PDB ID 9R53). B: Secondary structure comparison of ΨRRM2 NMR secondary chemical shift data, AF3 data and the here presented crystal structure (PDB ID 9HX5). C: Secondary structure comparison of tandem RRM NMR secondary chemical shift data, AF3 data and the here presented NMR (RRM1) and crystal (ΨRRM2) structure.


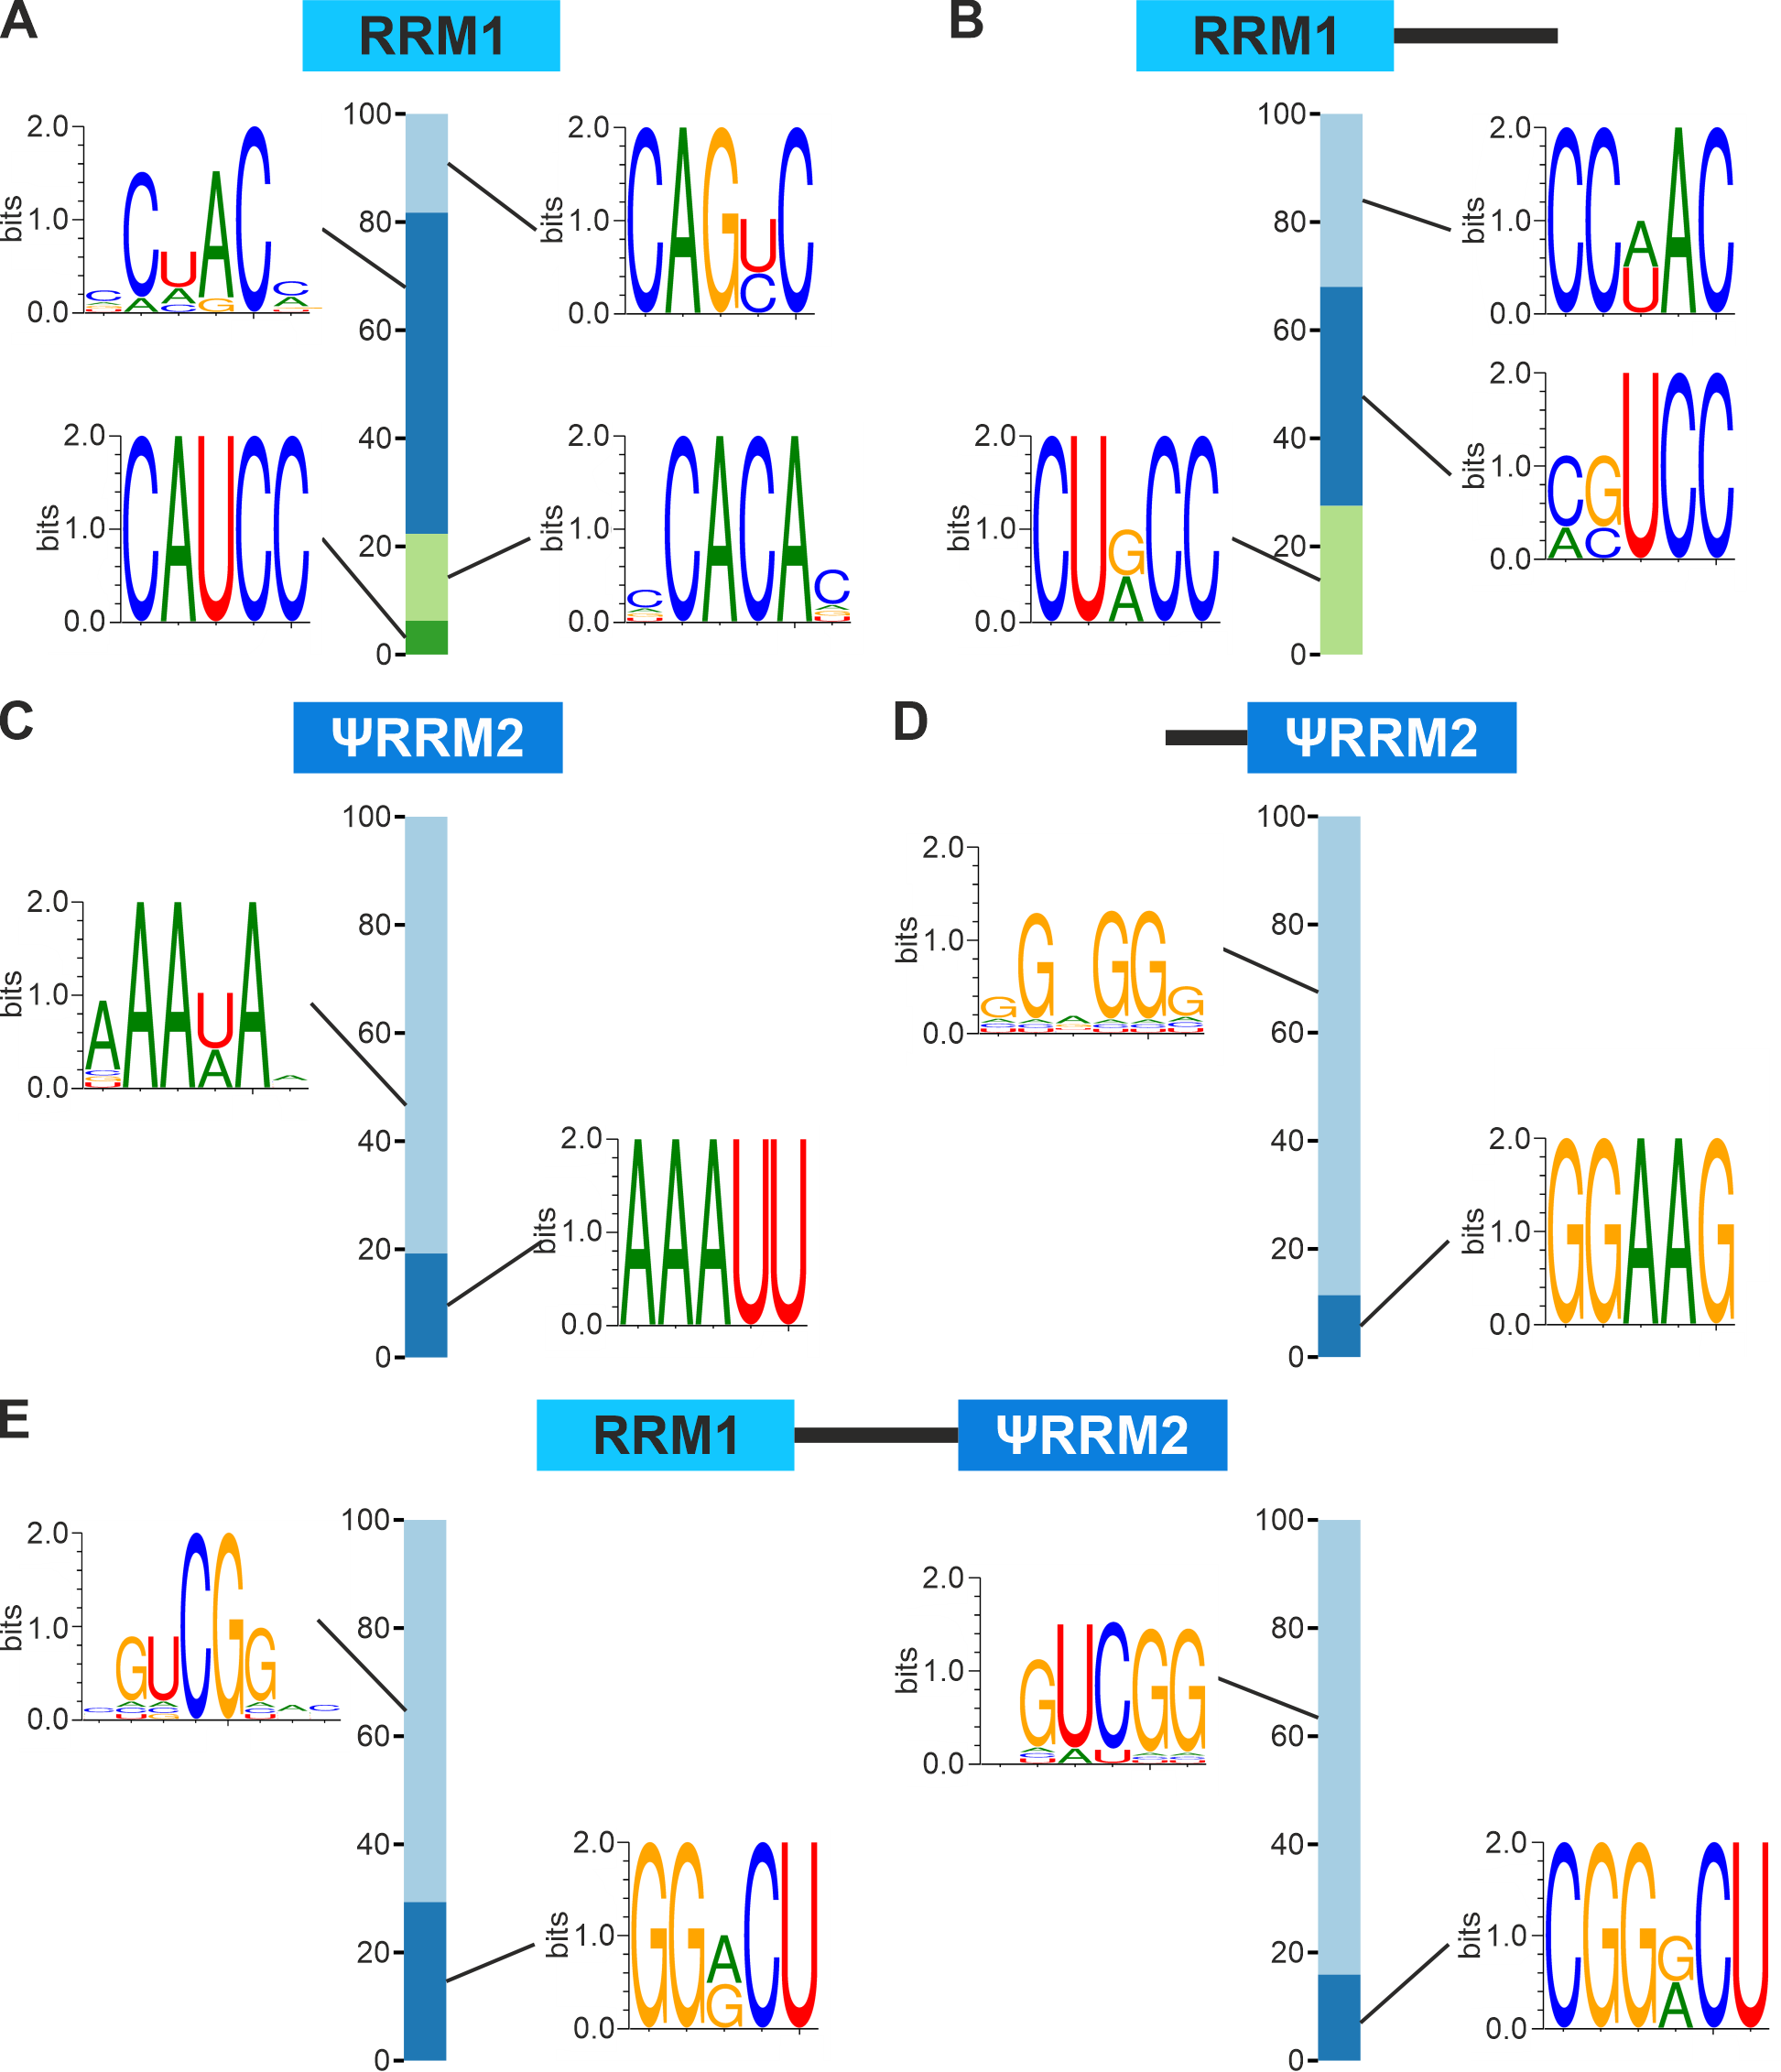


Supplementary Figure : RBNS sequence logos of single and tandem RRMs.

A-D: Sequence logos of respective single RRMs without (A and C) or with (B and D) linker region containing the significantly enriched (z-score > 2) 5-mers (left) weighted by the R-values. E: Sequence logos of the tandem RRM containing the significantly enriched (z-score > 2) 5-mers (left) and 6-mers (right) weighted by the R-values .The fraction of each logo in the bar graph is proportional to the sum of its R-1 -kmer values. Protein concentrations in (A) 40 µM, (B) 10 µM, (C) 40 µM, (D) 5 µM and (E) 5 µM.


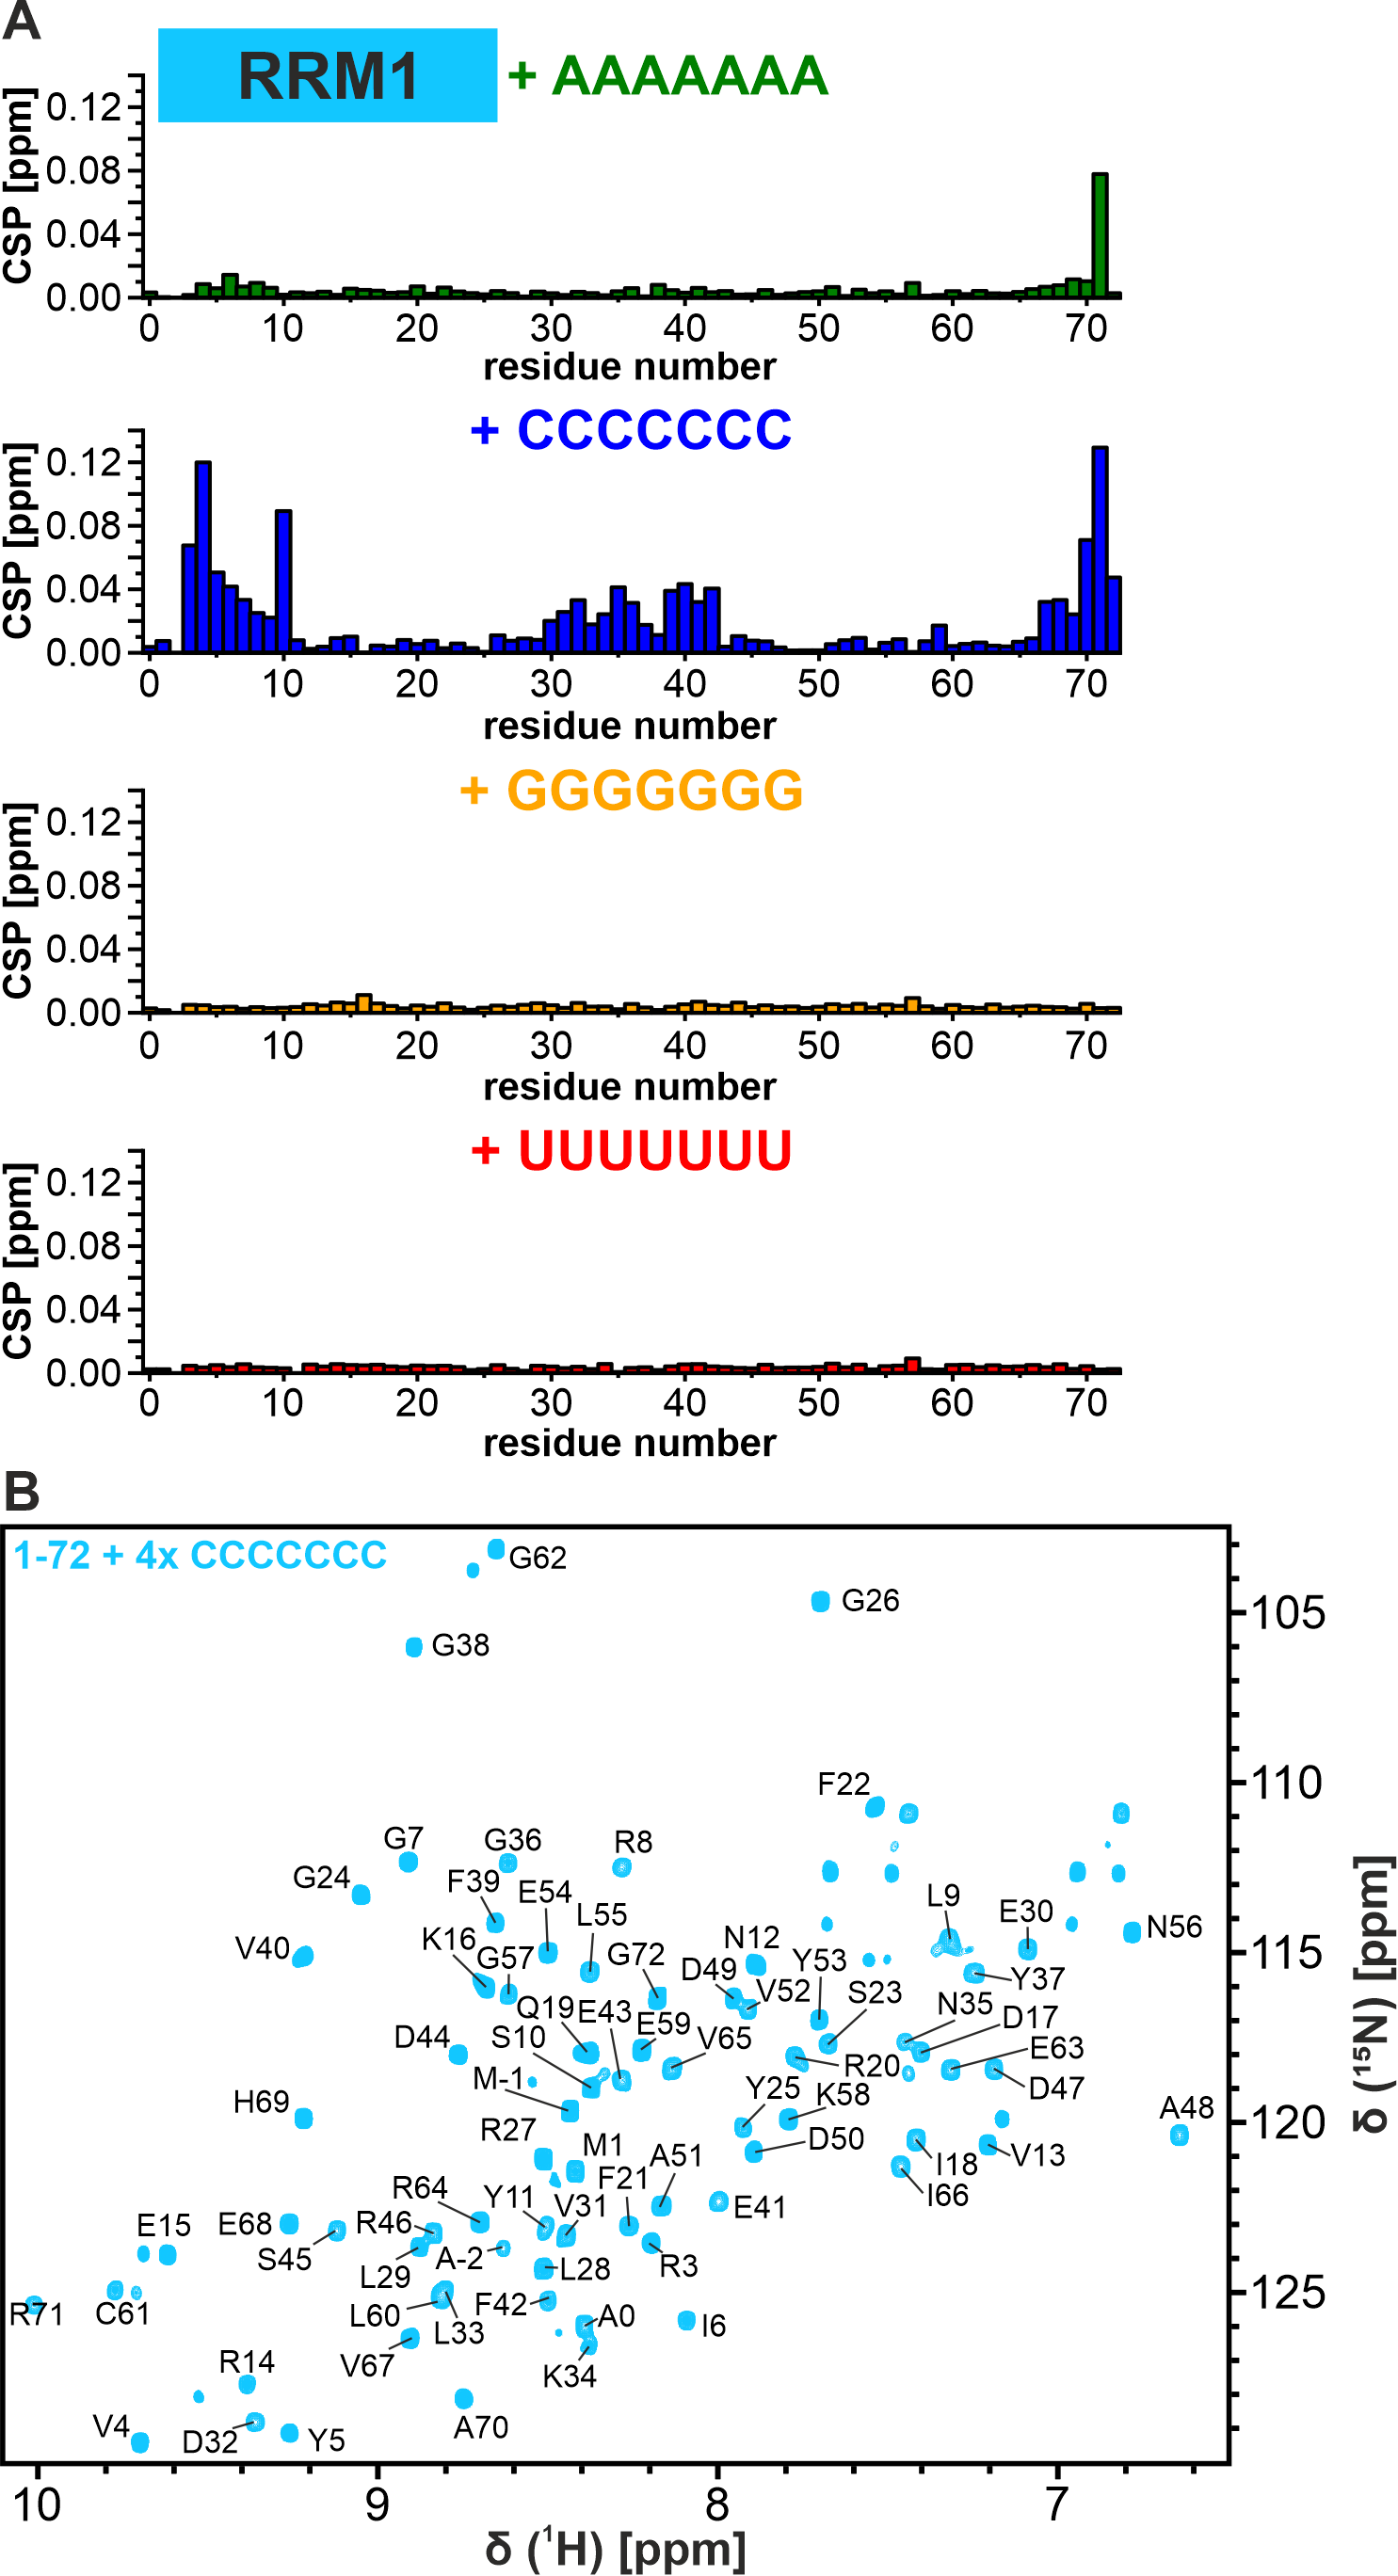


Supplementary Figure : SRSF6 RRM1 binding to poly-N RNAs.

A: CSP plots of RRM1 upon addition of 2-fold molar excess of poly-N RNAs. RNA sequences for 7-mer poly-N-RNA are given above each plot respectively. All measurements were performed with 40 µM of protein at 298K and 600 MHz in buffer containing 25 mM NaPi, 150 mM NaCl, 2 mM DTT, 0.02 % NaN3 and 5% (v/v) D2O at pH 6.5. B: 1H-15N-HSQC of RRM1 with 4-fold molar excess of poly-C RNA. Assignments based on triple resonance experiments are shown for respective peaks.


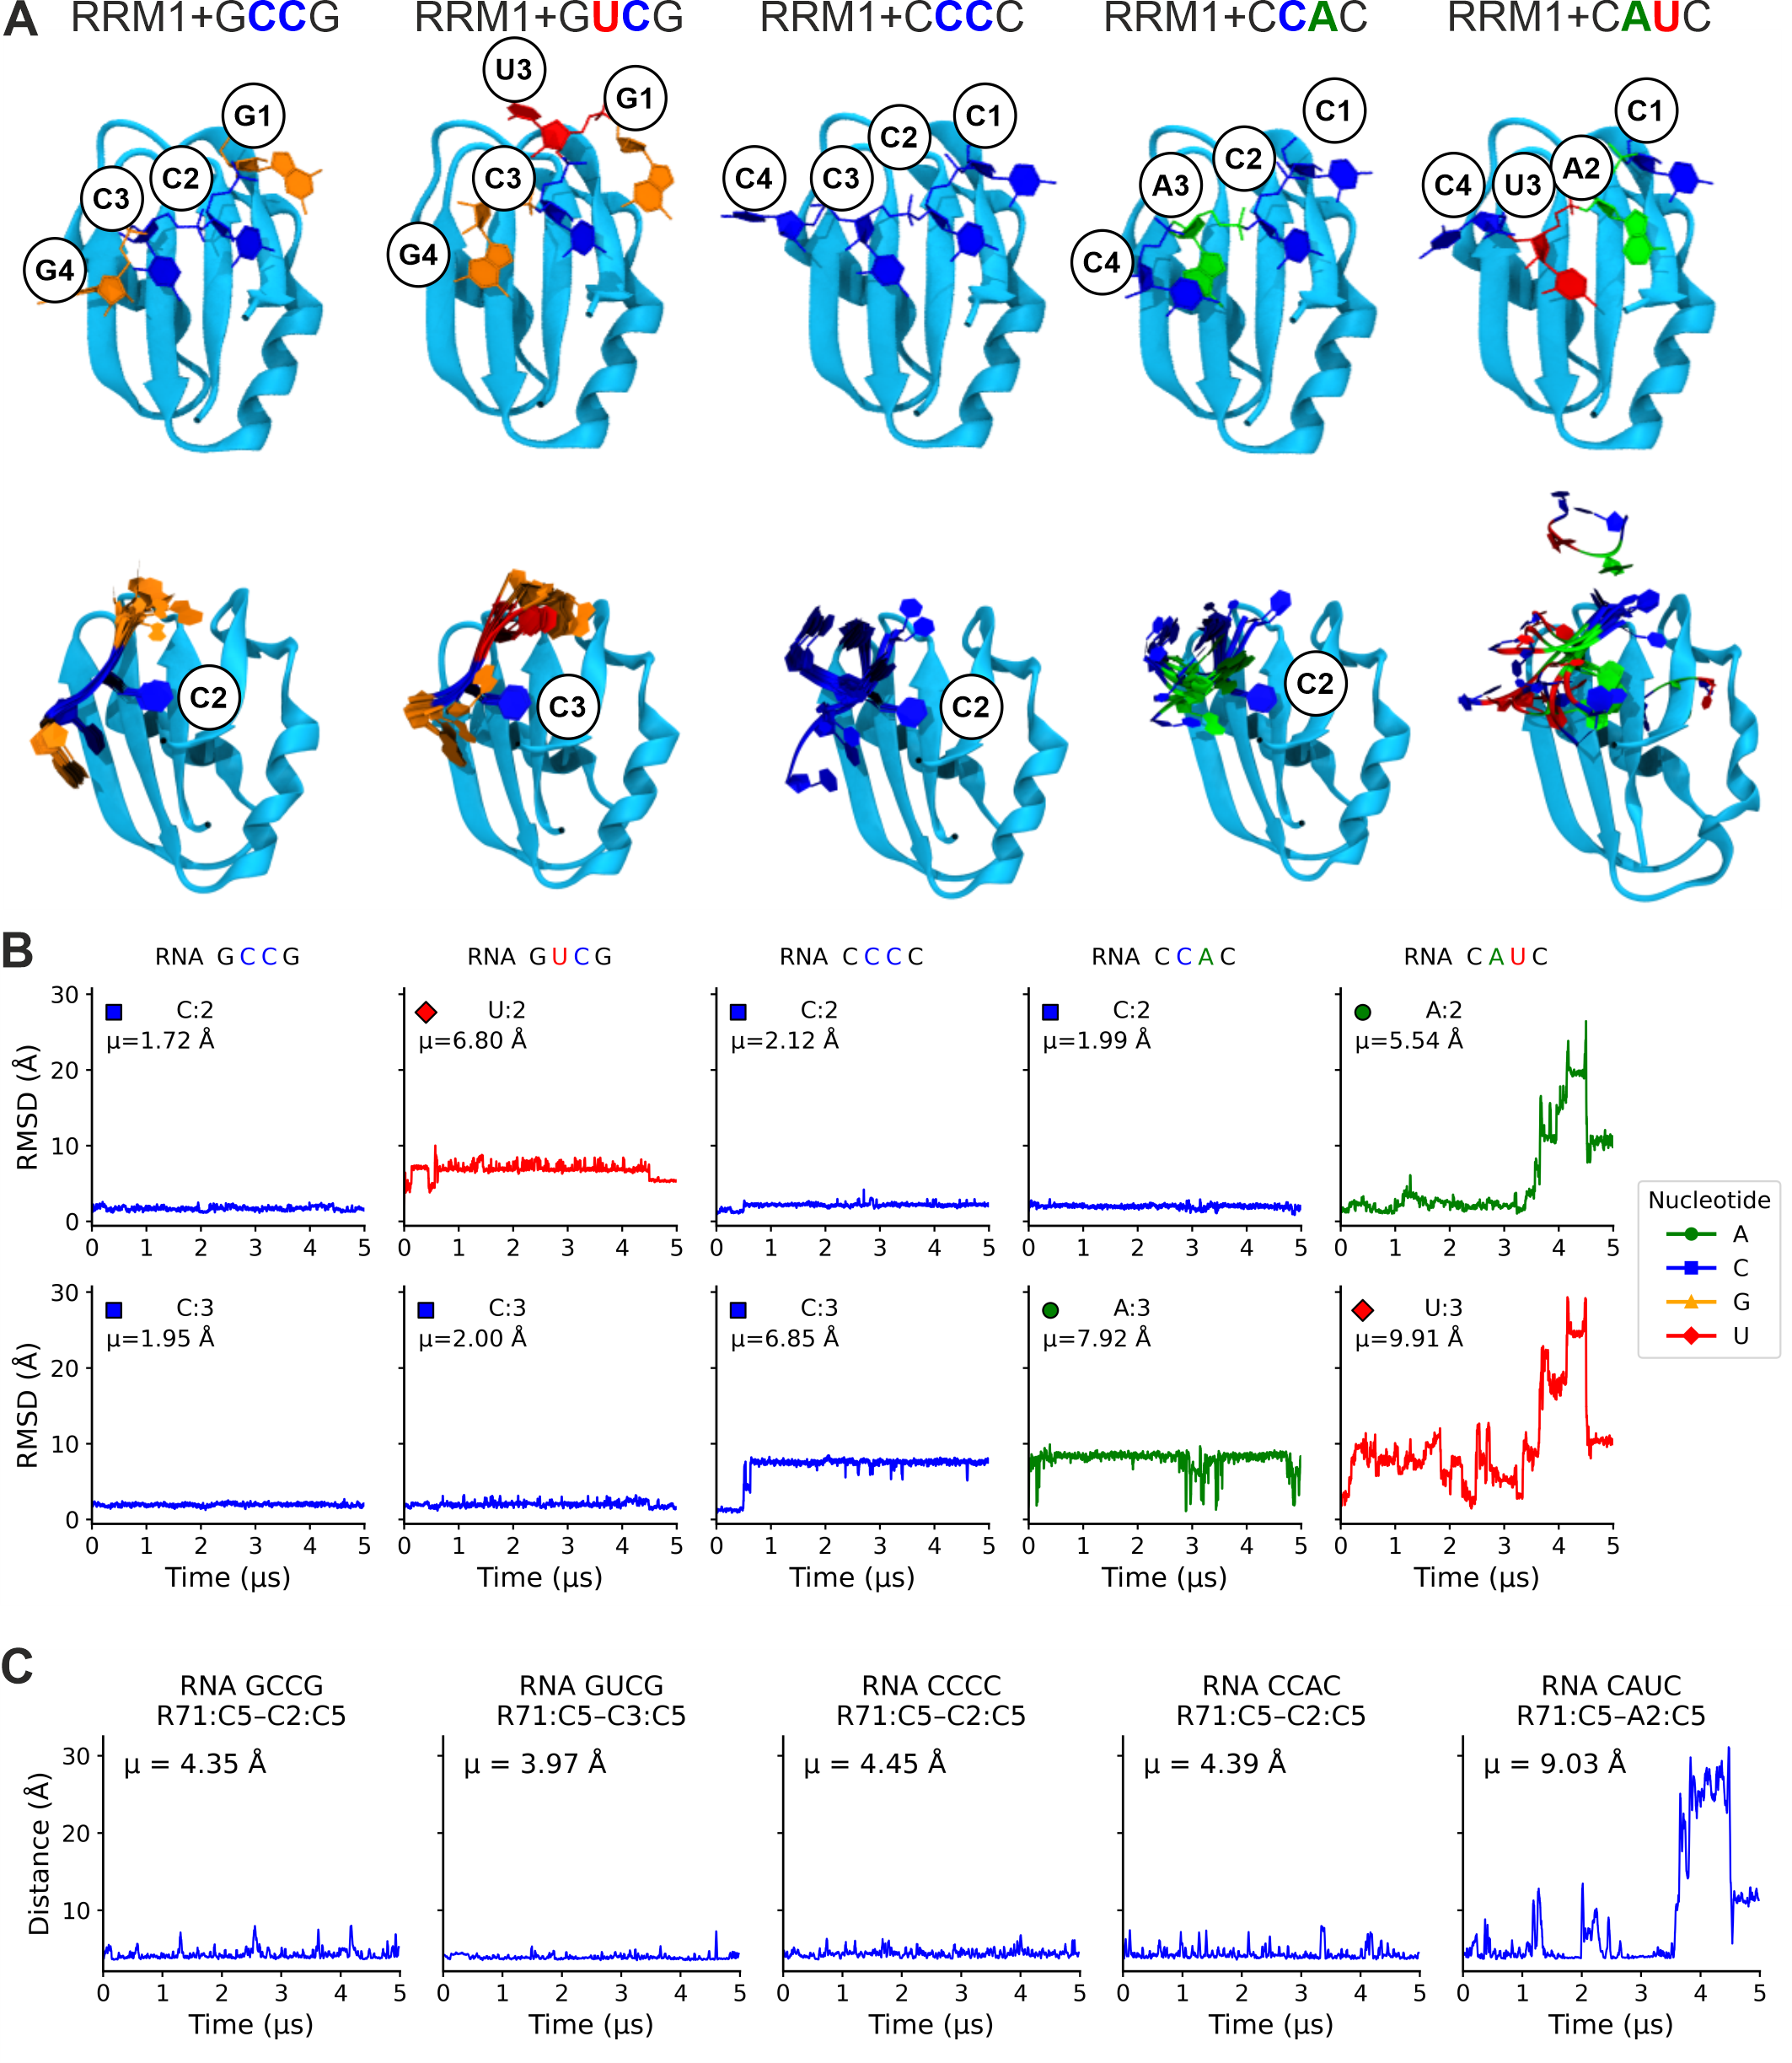


Supplementary Figure : Overview of Molecular simulations for SRSF6 RRM1.

A: Top: Structures of SRSF6 RRM1 in complex with RNA tetramers (GCCG, GCUG, CCCC, CACC, and CUAC). Structures are generated using AF3 and were used as starting structures for MD simulations.
Bottom: RNA dynamics from 5-μs simulations per system. RNA configurations are shown in a time step of 0.5 μs after alignment of protein and RNA heavy atoms. The residue placed in the binding pocket is labeled accordingly. Nucleotides are color-coded: A green, C blue, G orange, U red. RMSDs of protein backbone atoms to the NMR structure were between 1.85 and 2.04 Å. B: RMSDs of the second and third RNA residues in RNA tetramers as a function of time. RMSDs were calculated after alignment of protein and RNA heavy atoms. Mean RMSD values are given on top of each plot. Nucleotides are color-coded and marked as follows: A (green circles), C (blue squares), G (orange triangles), and U (red diamonds). The corresponding RNA sequence for each simulation is shown above the plots. C: Distance between Arg71:C5 and Cytosine (C2/C3):C5 over time for each simulation of RRM1 in complex with an RNA tetramer. In systems 1 and 3–5, the second RNA residue occupies the RRM1 binding site. In system 2 (RRM1 + RNA GUCG), the third RNA residue (C3) is positioned at the RRM1 binding site and is therefore shown. Mean distance values are given for each system. The corresponding RNA sequence for each simulation is shown above the plots.


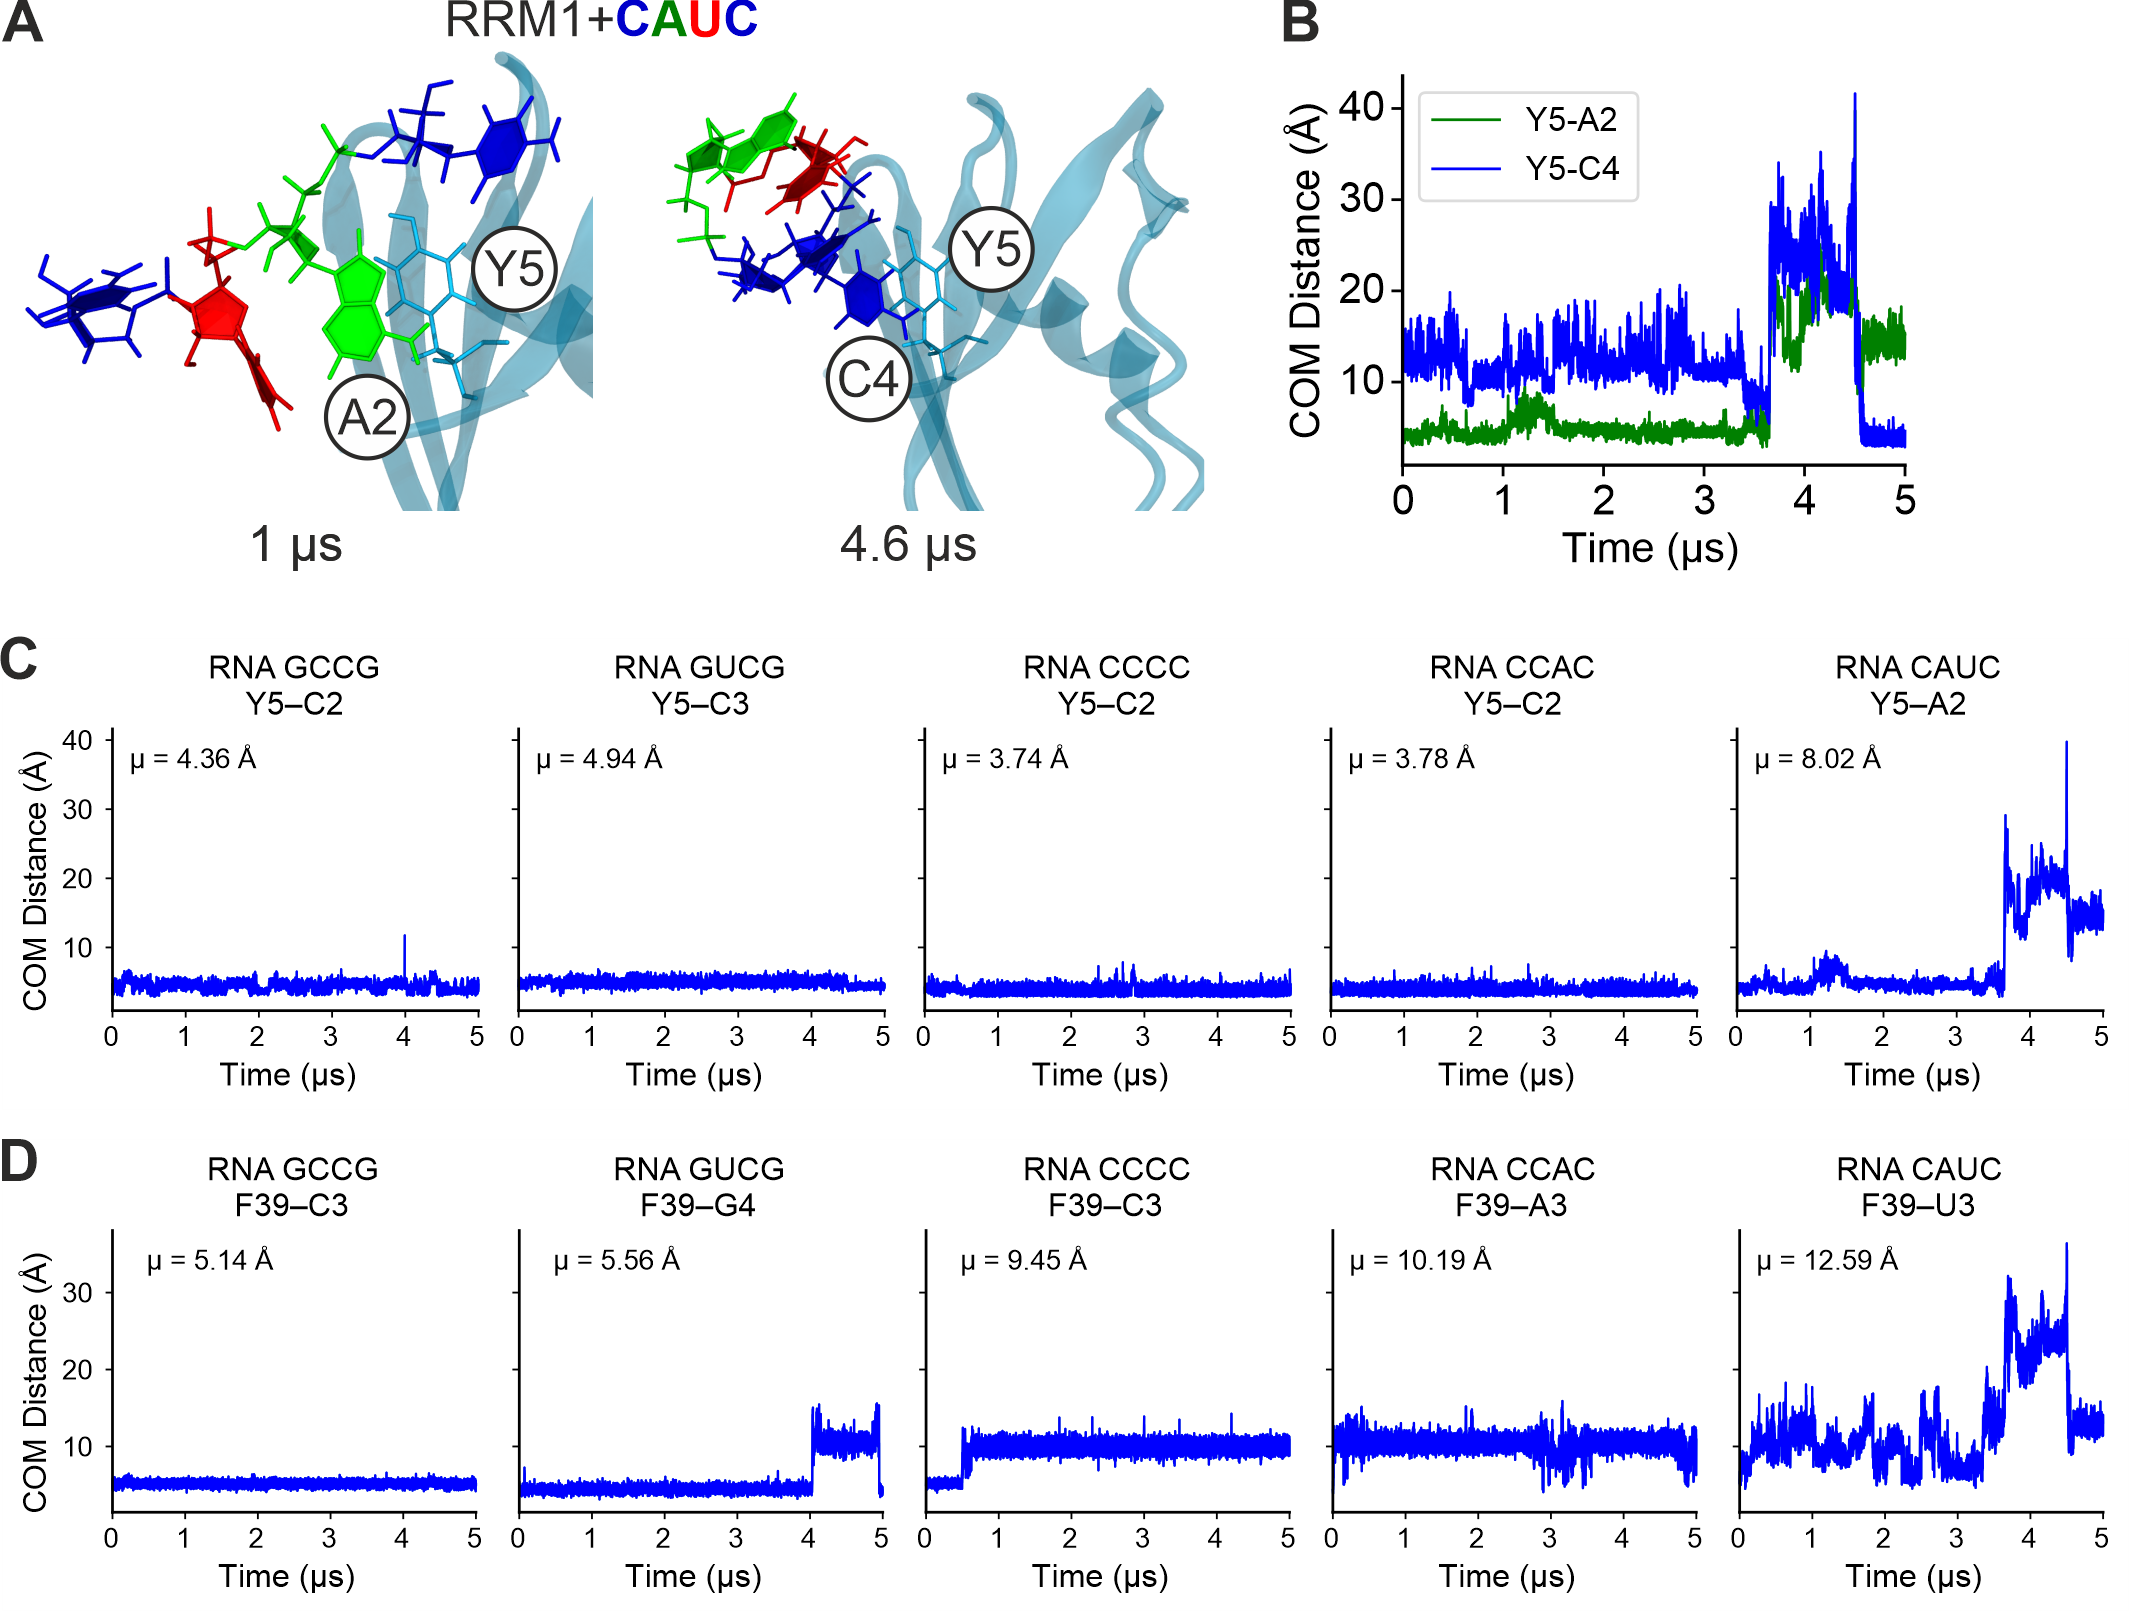


Supplementary Figure : Molecular simulations of SRSF6 RRM1 with CAUC RNA.

A: Snapshots from RRM1 RNA CAUC simulations at 1 µs and 4.6 µs. First, A2 (green) is bound to RRM1, after detaching, RNA residue C4 (blue) binds at this position. B: Center of mass distance of RRM1 Tyr5 ring with RNA residues A2 (green) and C4 (blue) rings from simulations. C: Center of mass distance of Tyr5 ring with the respective nucleotide rings over time. D: Center of mass distance of Phe39 rings with the respective nucleotide rings over time.


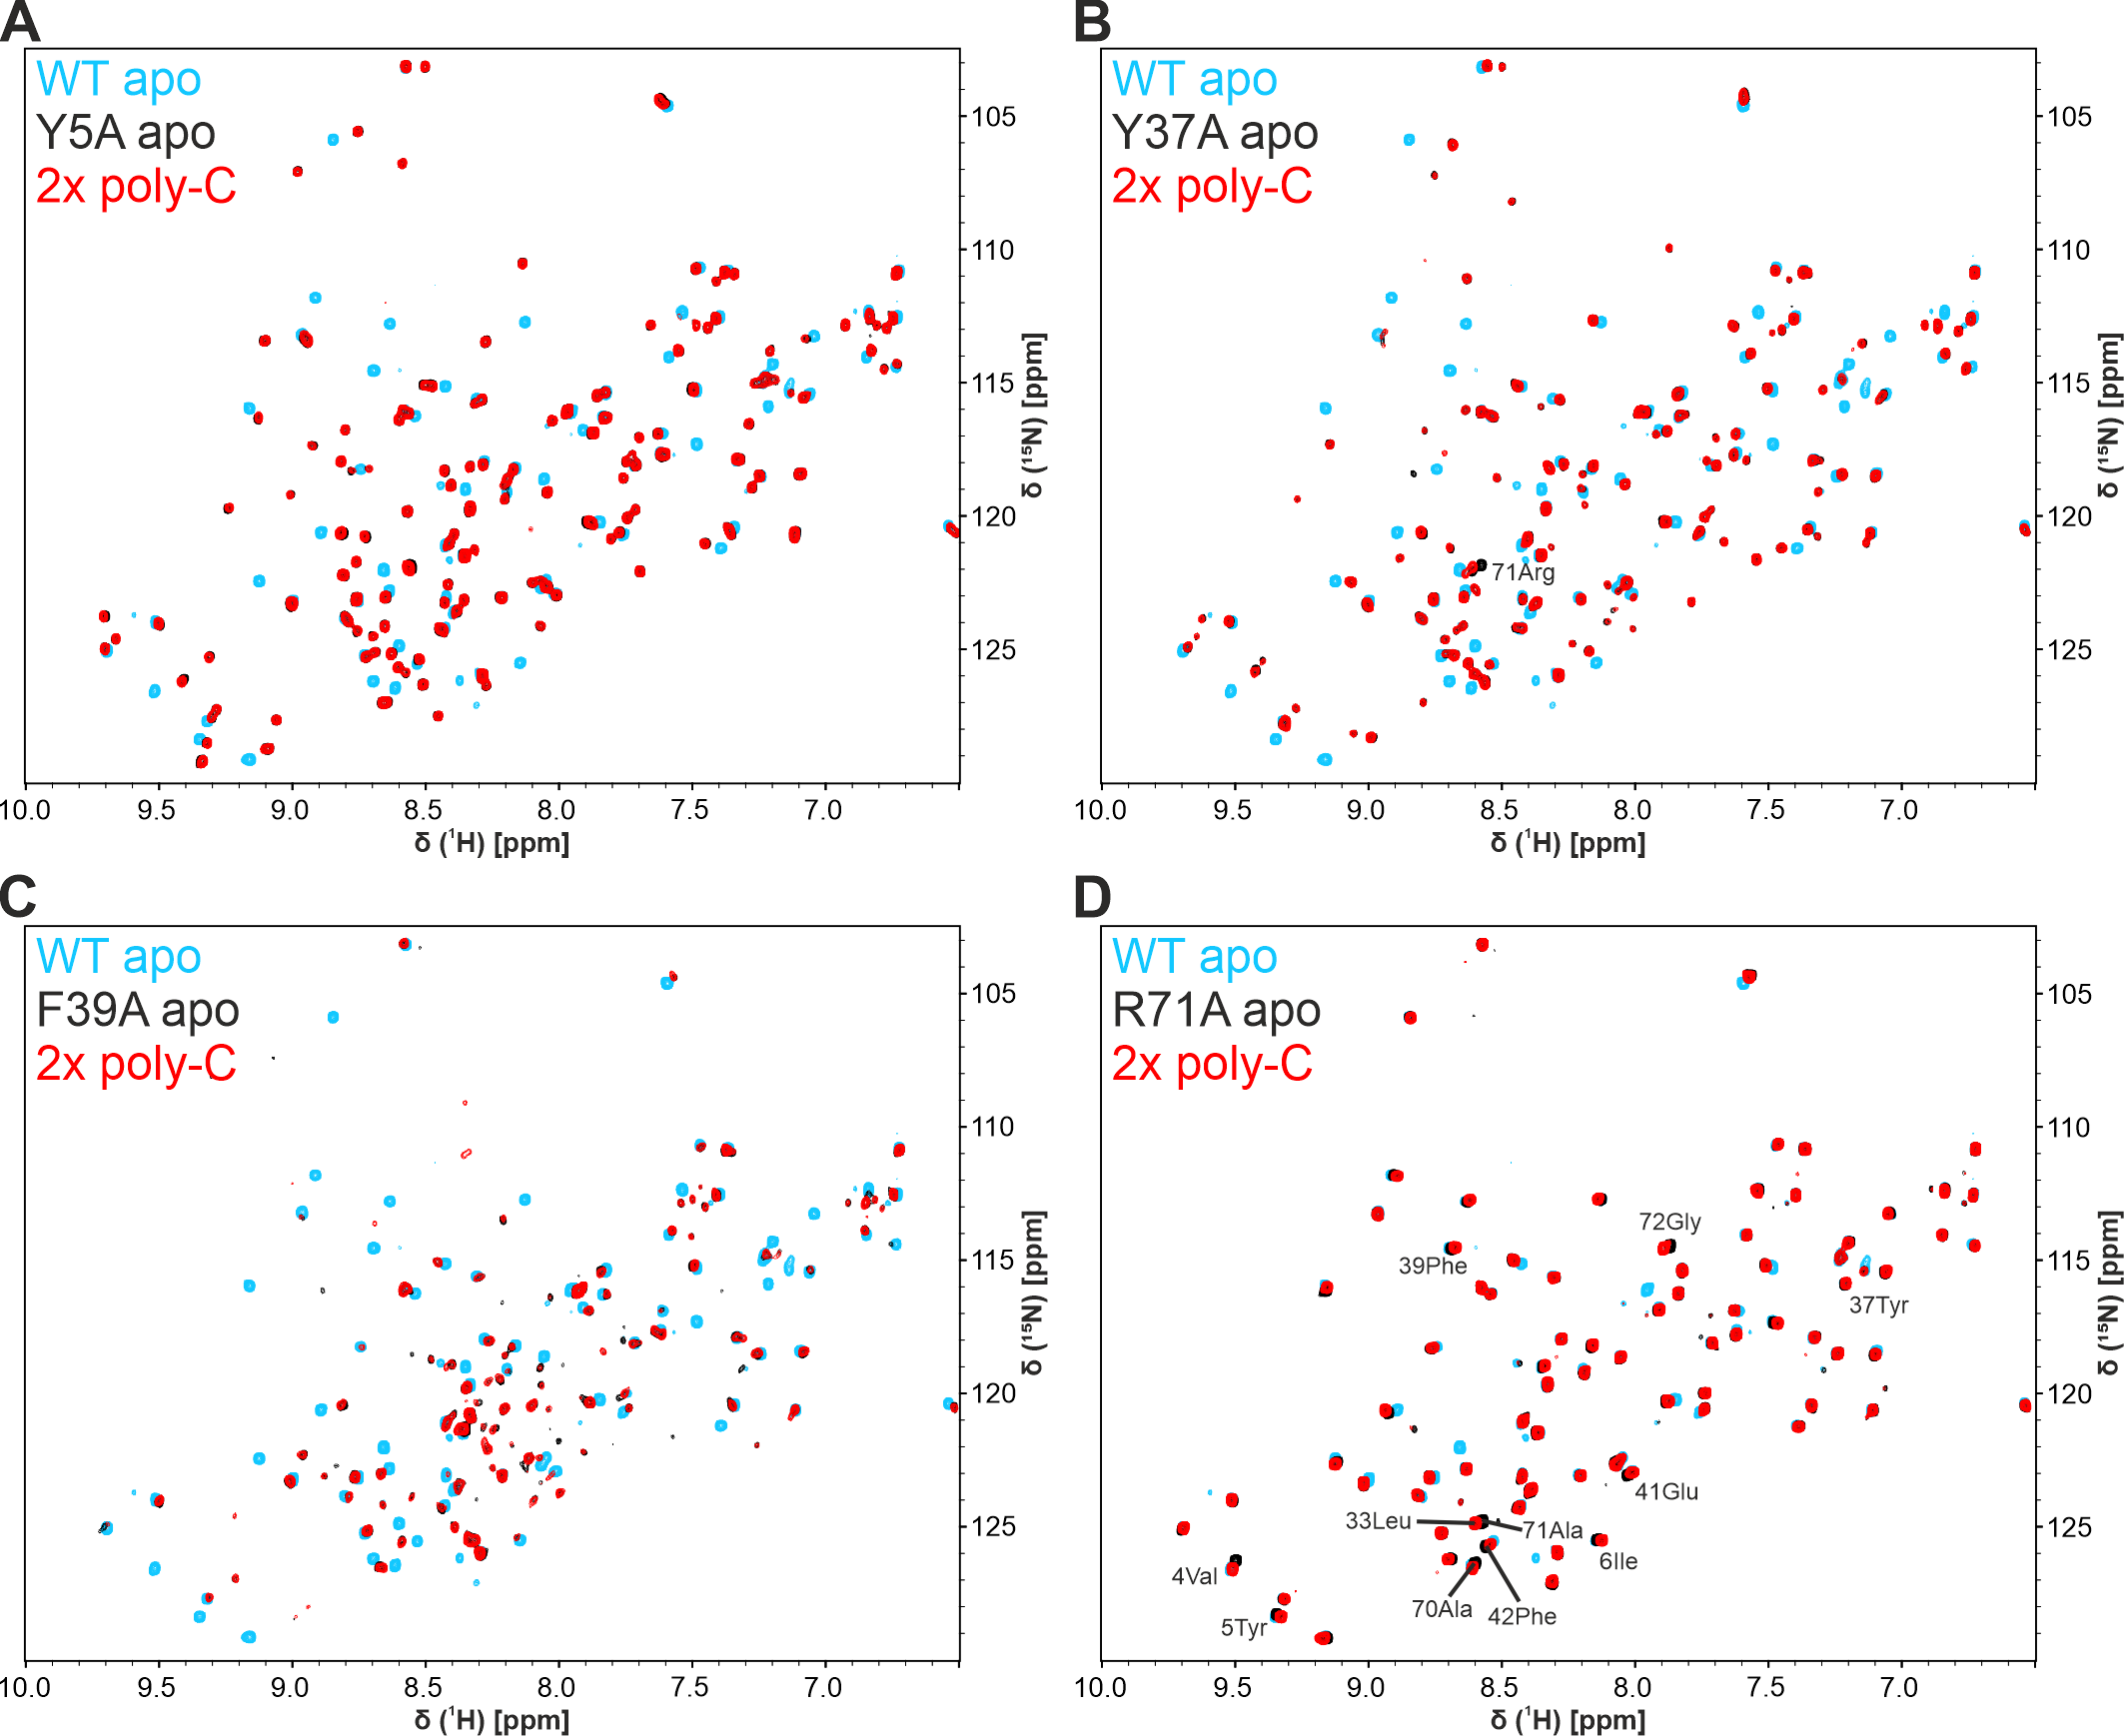


Supplementary Figure : Effects of SRSF6 RRM1 mutants on domain conformation and binding to poly-C RNA.

Overlays of 1H-15N-HSQC spectra showing RRM1 WT apo (blue) compared to RRM1 mutants apo (black) and with 2-fold molar excess of poly-C RNA (red) as indicated in upper left corner of each spectrum. Spectra were recorded with 70 µM of protein at 298K and 700 MHz in buffer containing 25 mM NaPi, 150 mM NaCl, 50 mM l-R/E, 2 mM DTT, 0.02 % NaN3 and 5 % (v/v) D2O at pH 6.5.


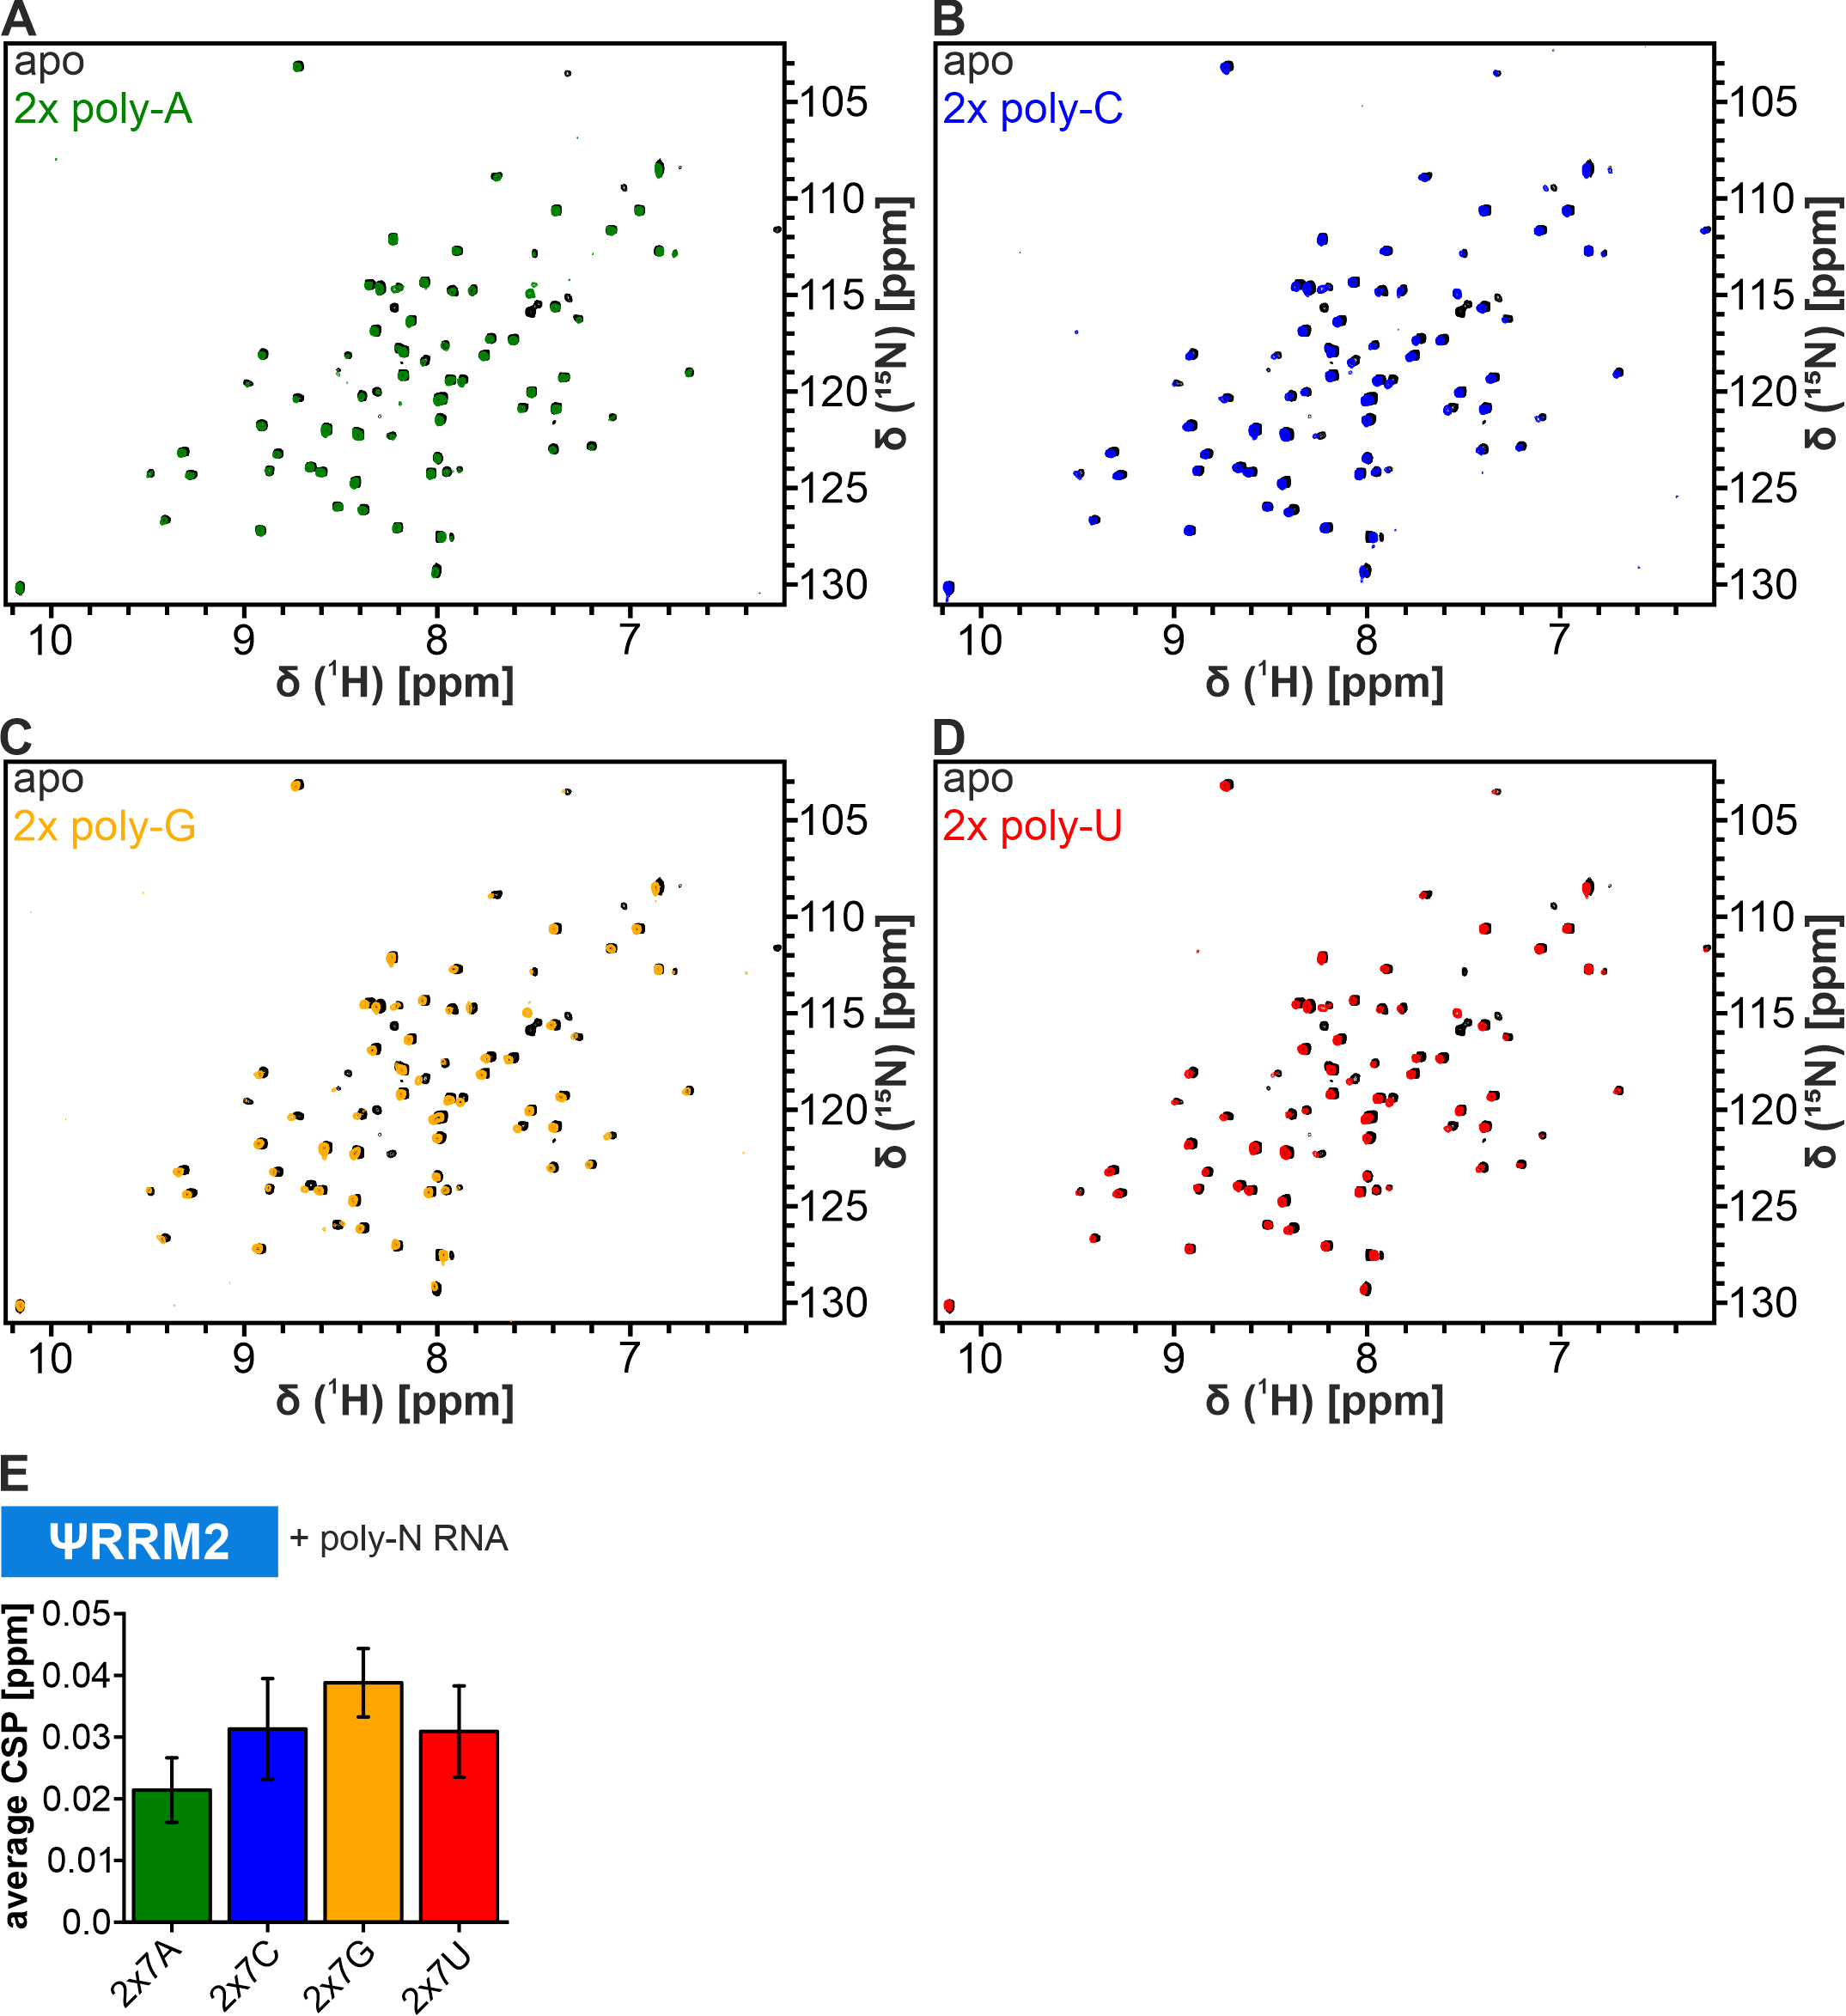


Supplementary Figure : ΨRRM2 interaction with RNA.

A-D: Overlays of 1H-15N-HSQC spectra of ΨRRM2 upon addition of 2-fold molar excess of poly-N RNAs. All measurements were performed with 40 µM of protein at 298K and 600 MHz in buffer containing 25 mM NaPi, 150 mM NaCl, 2 mM DTT, 0.02 % NaN3 and 5 % (v/v) D2O at pH 6.5. E: Average CSPs from spectra in A-D.


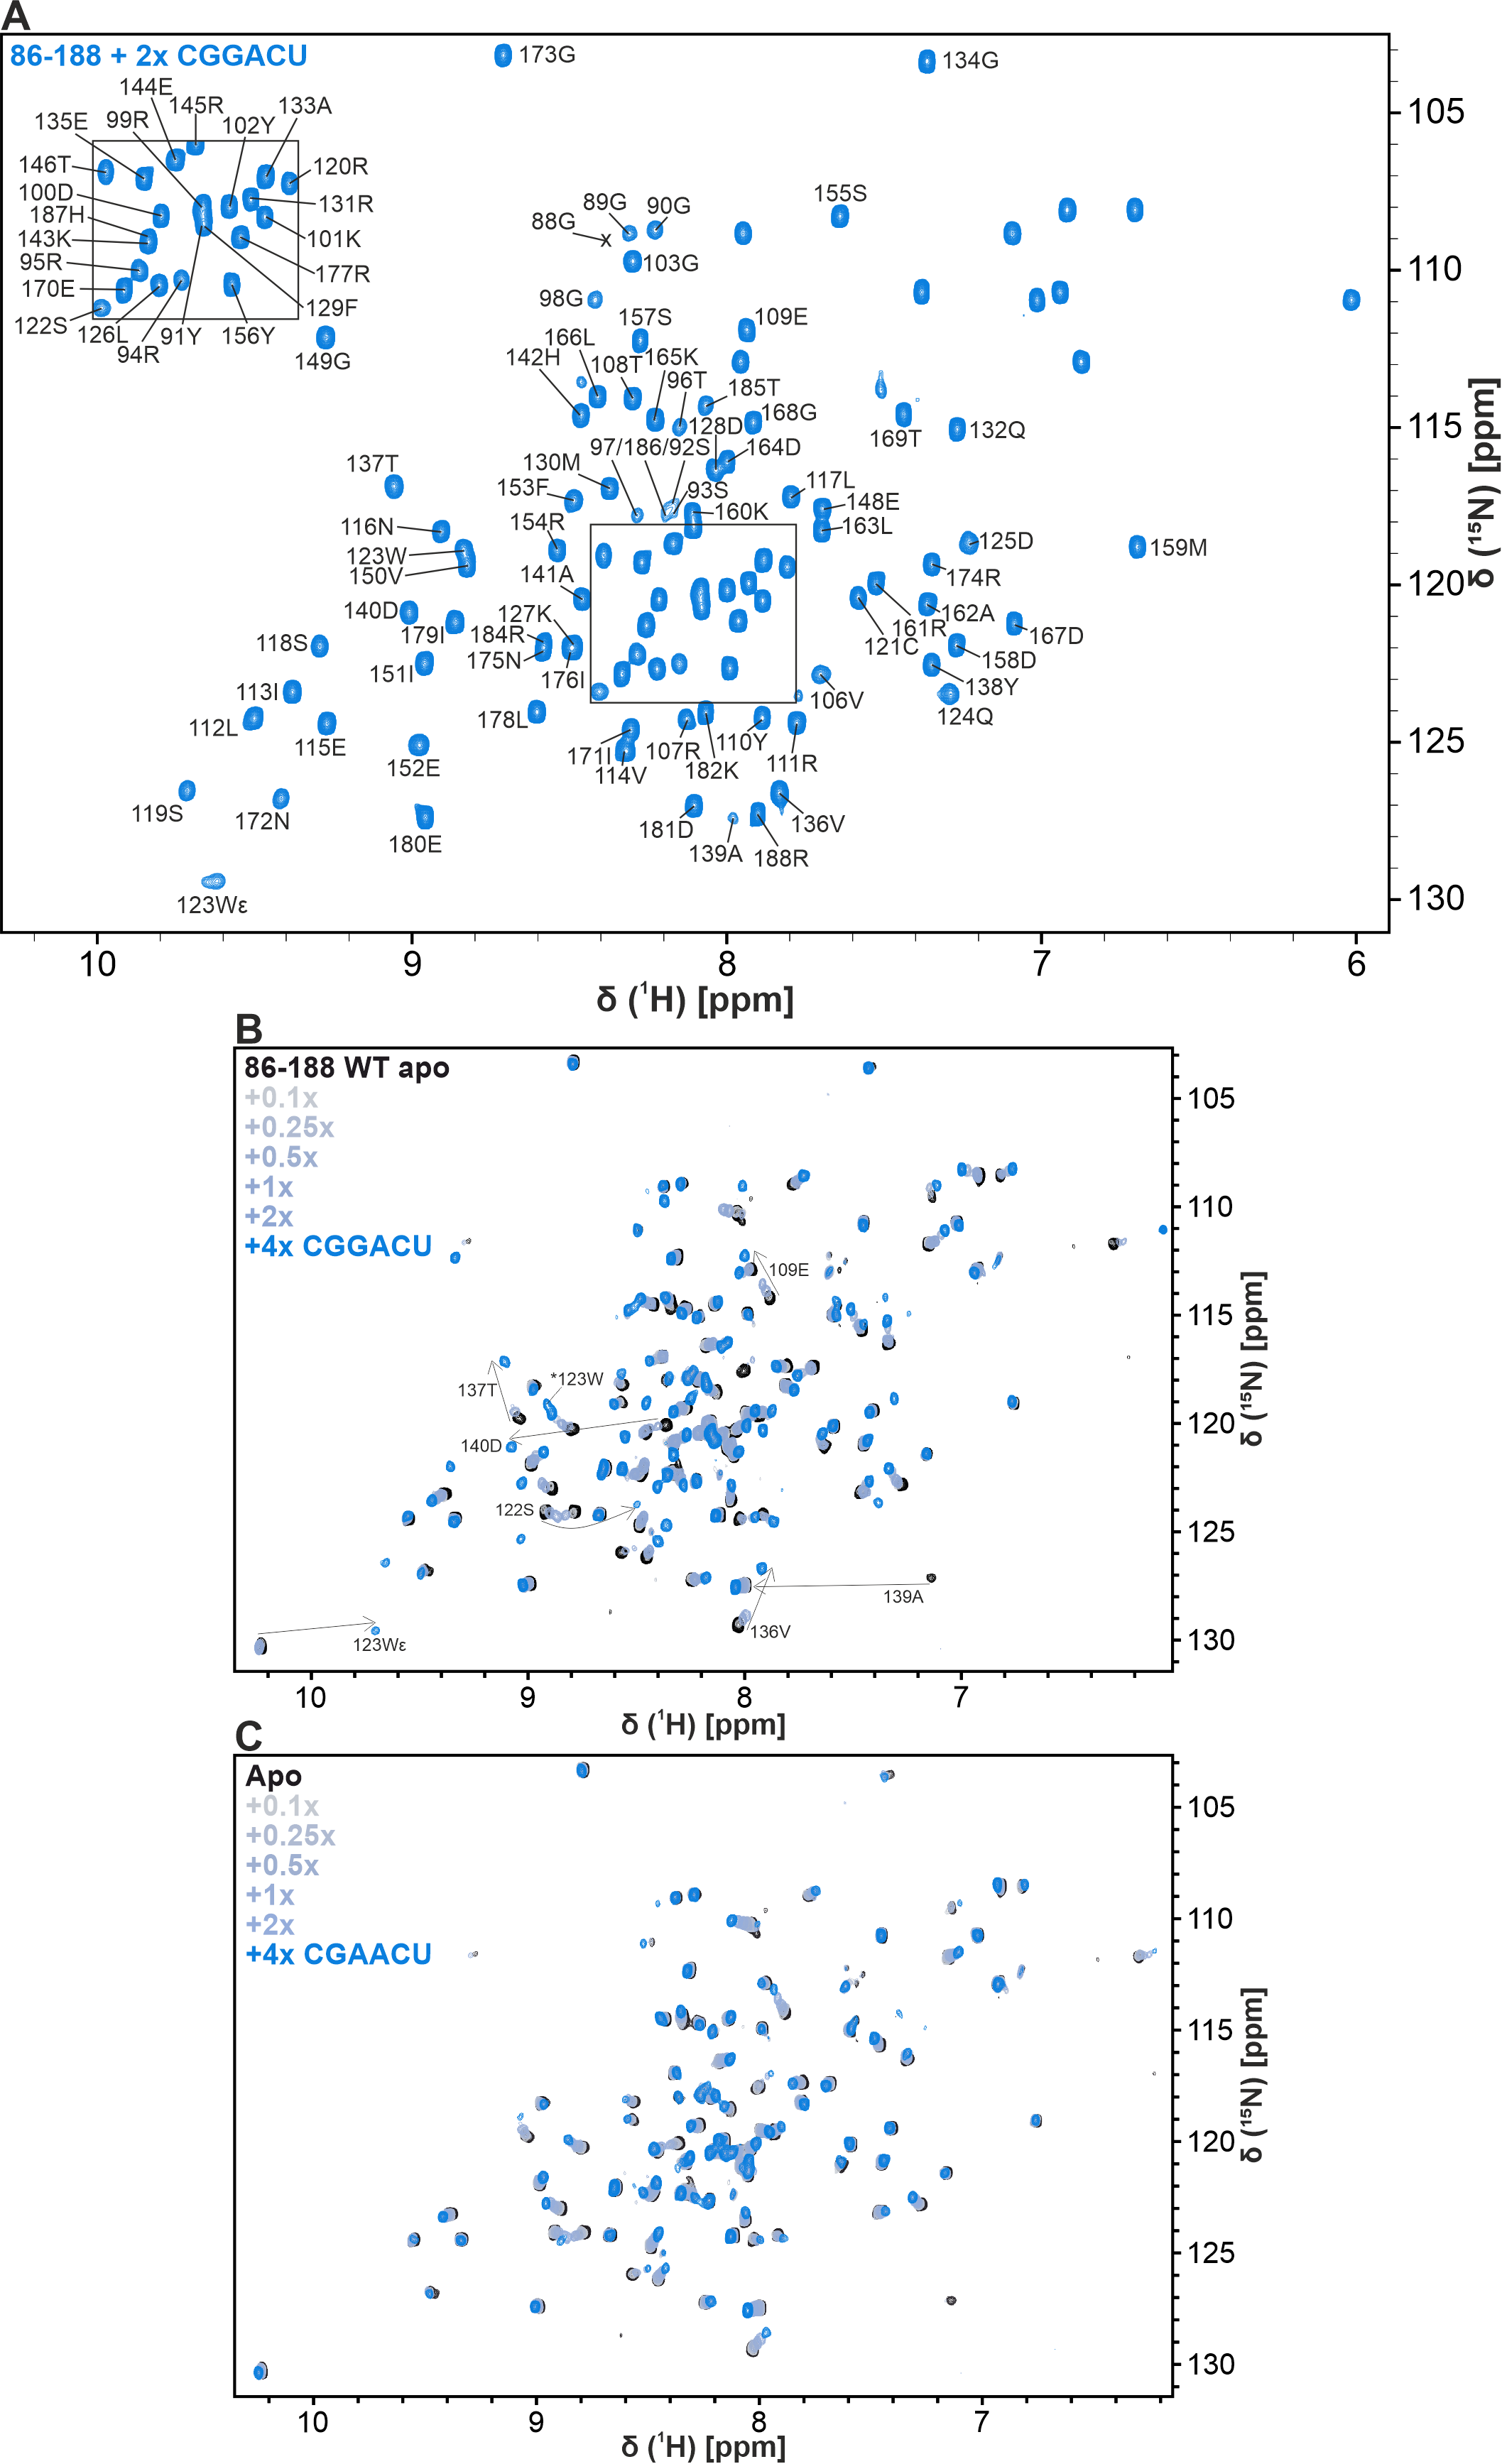


Supplementary Figure : NMR-observed titrations of ΨRRM2 (86-188) with 6-mer RNAs.

A: 1H-15N-HSQC of ΨRRM2 with 2-fold molar excess of CGGACU RNA. Assignments based on triple resonance experiments are shown for respective peaks. B/C: 1H-15N-HSQC spectra of ΨRRM2 titrated with CGGACU RNA (B) and CGAACU RNA (C). Spectra in B and C were recorded with 100 µM of protein at 600 MHz and 298 K in buffer containing 20 mM NaPi, 170 mM NaCl, 60 mM l-R/E, 2 mM DTT, 0.02 % NaN3 and 5 % (v/v) D2O at pH 7.0.


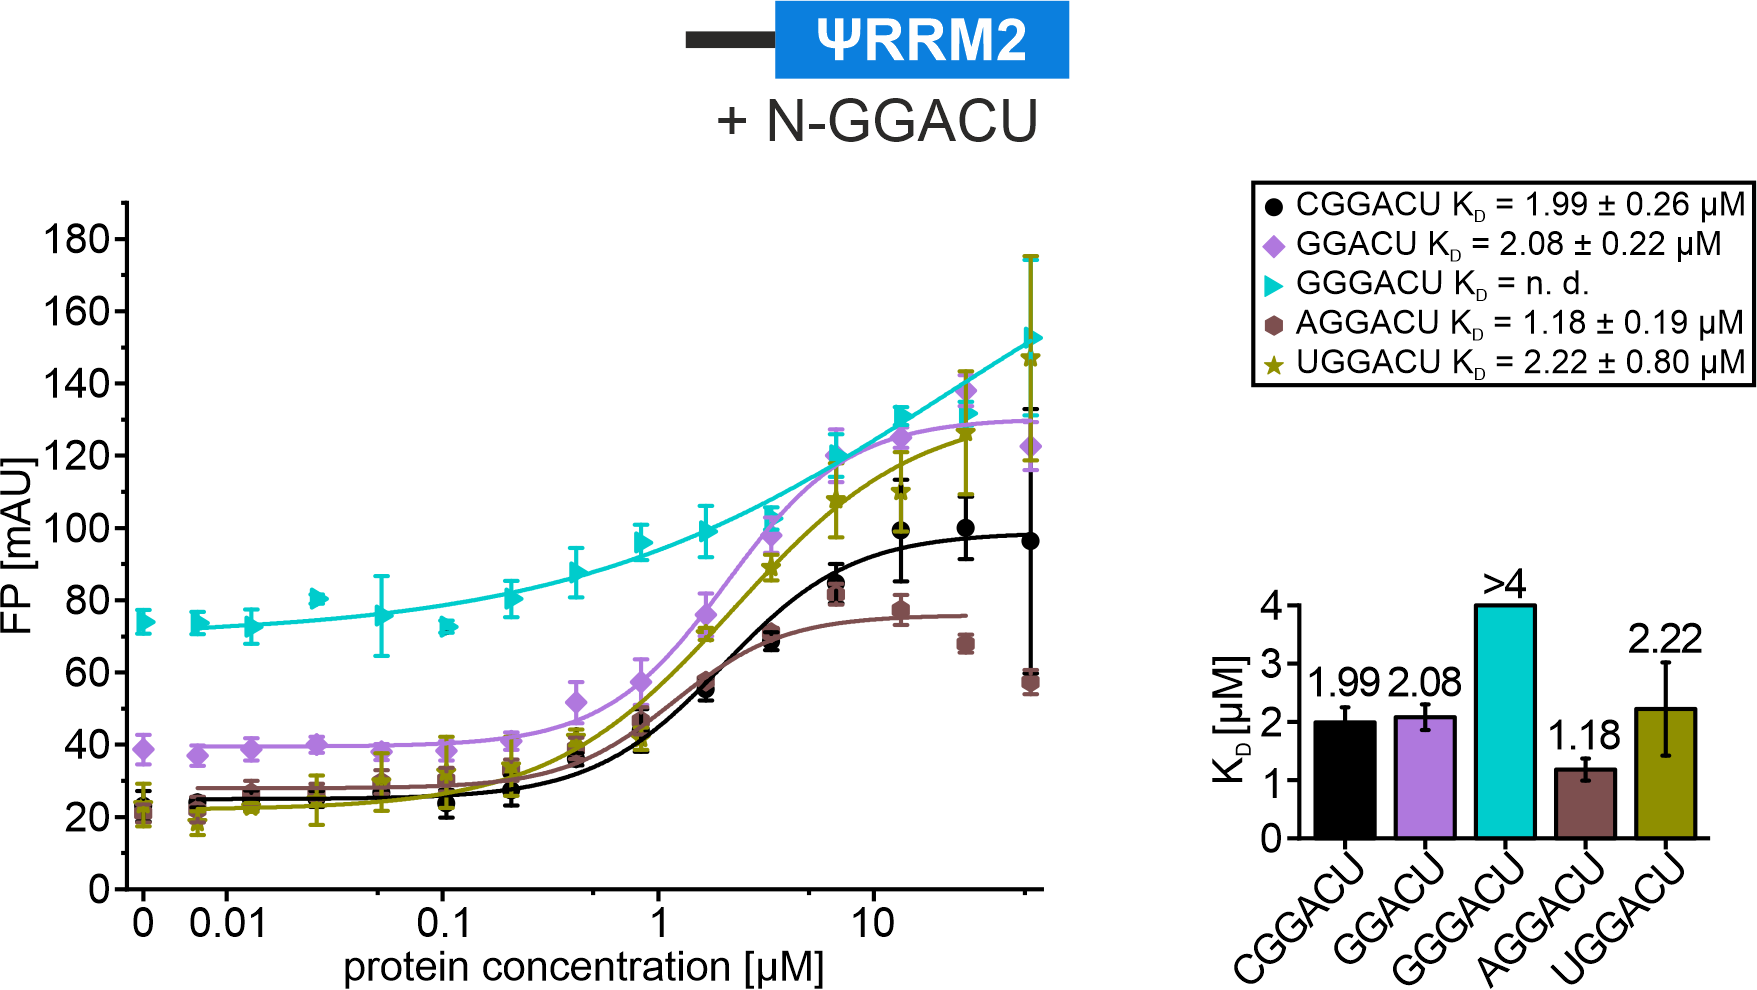


Supplementary Figure : FP assay of ΨRRM2 (86-188) with N-GGACU RNA.

Measurements were performed in triplicates; averages with standard deviation plotted and fitted to derive affinities (KD).


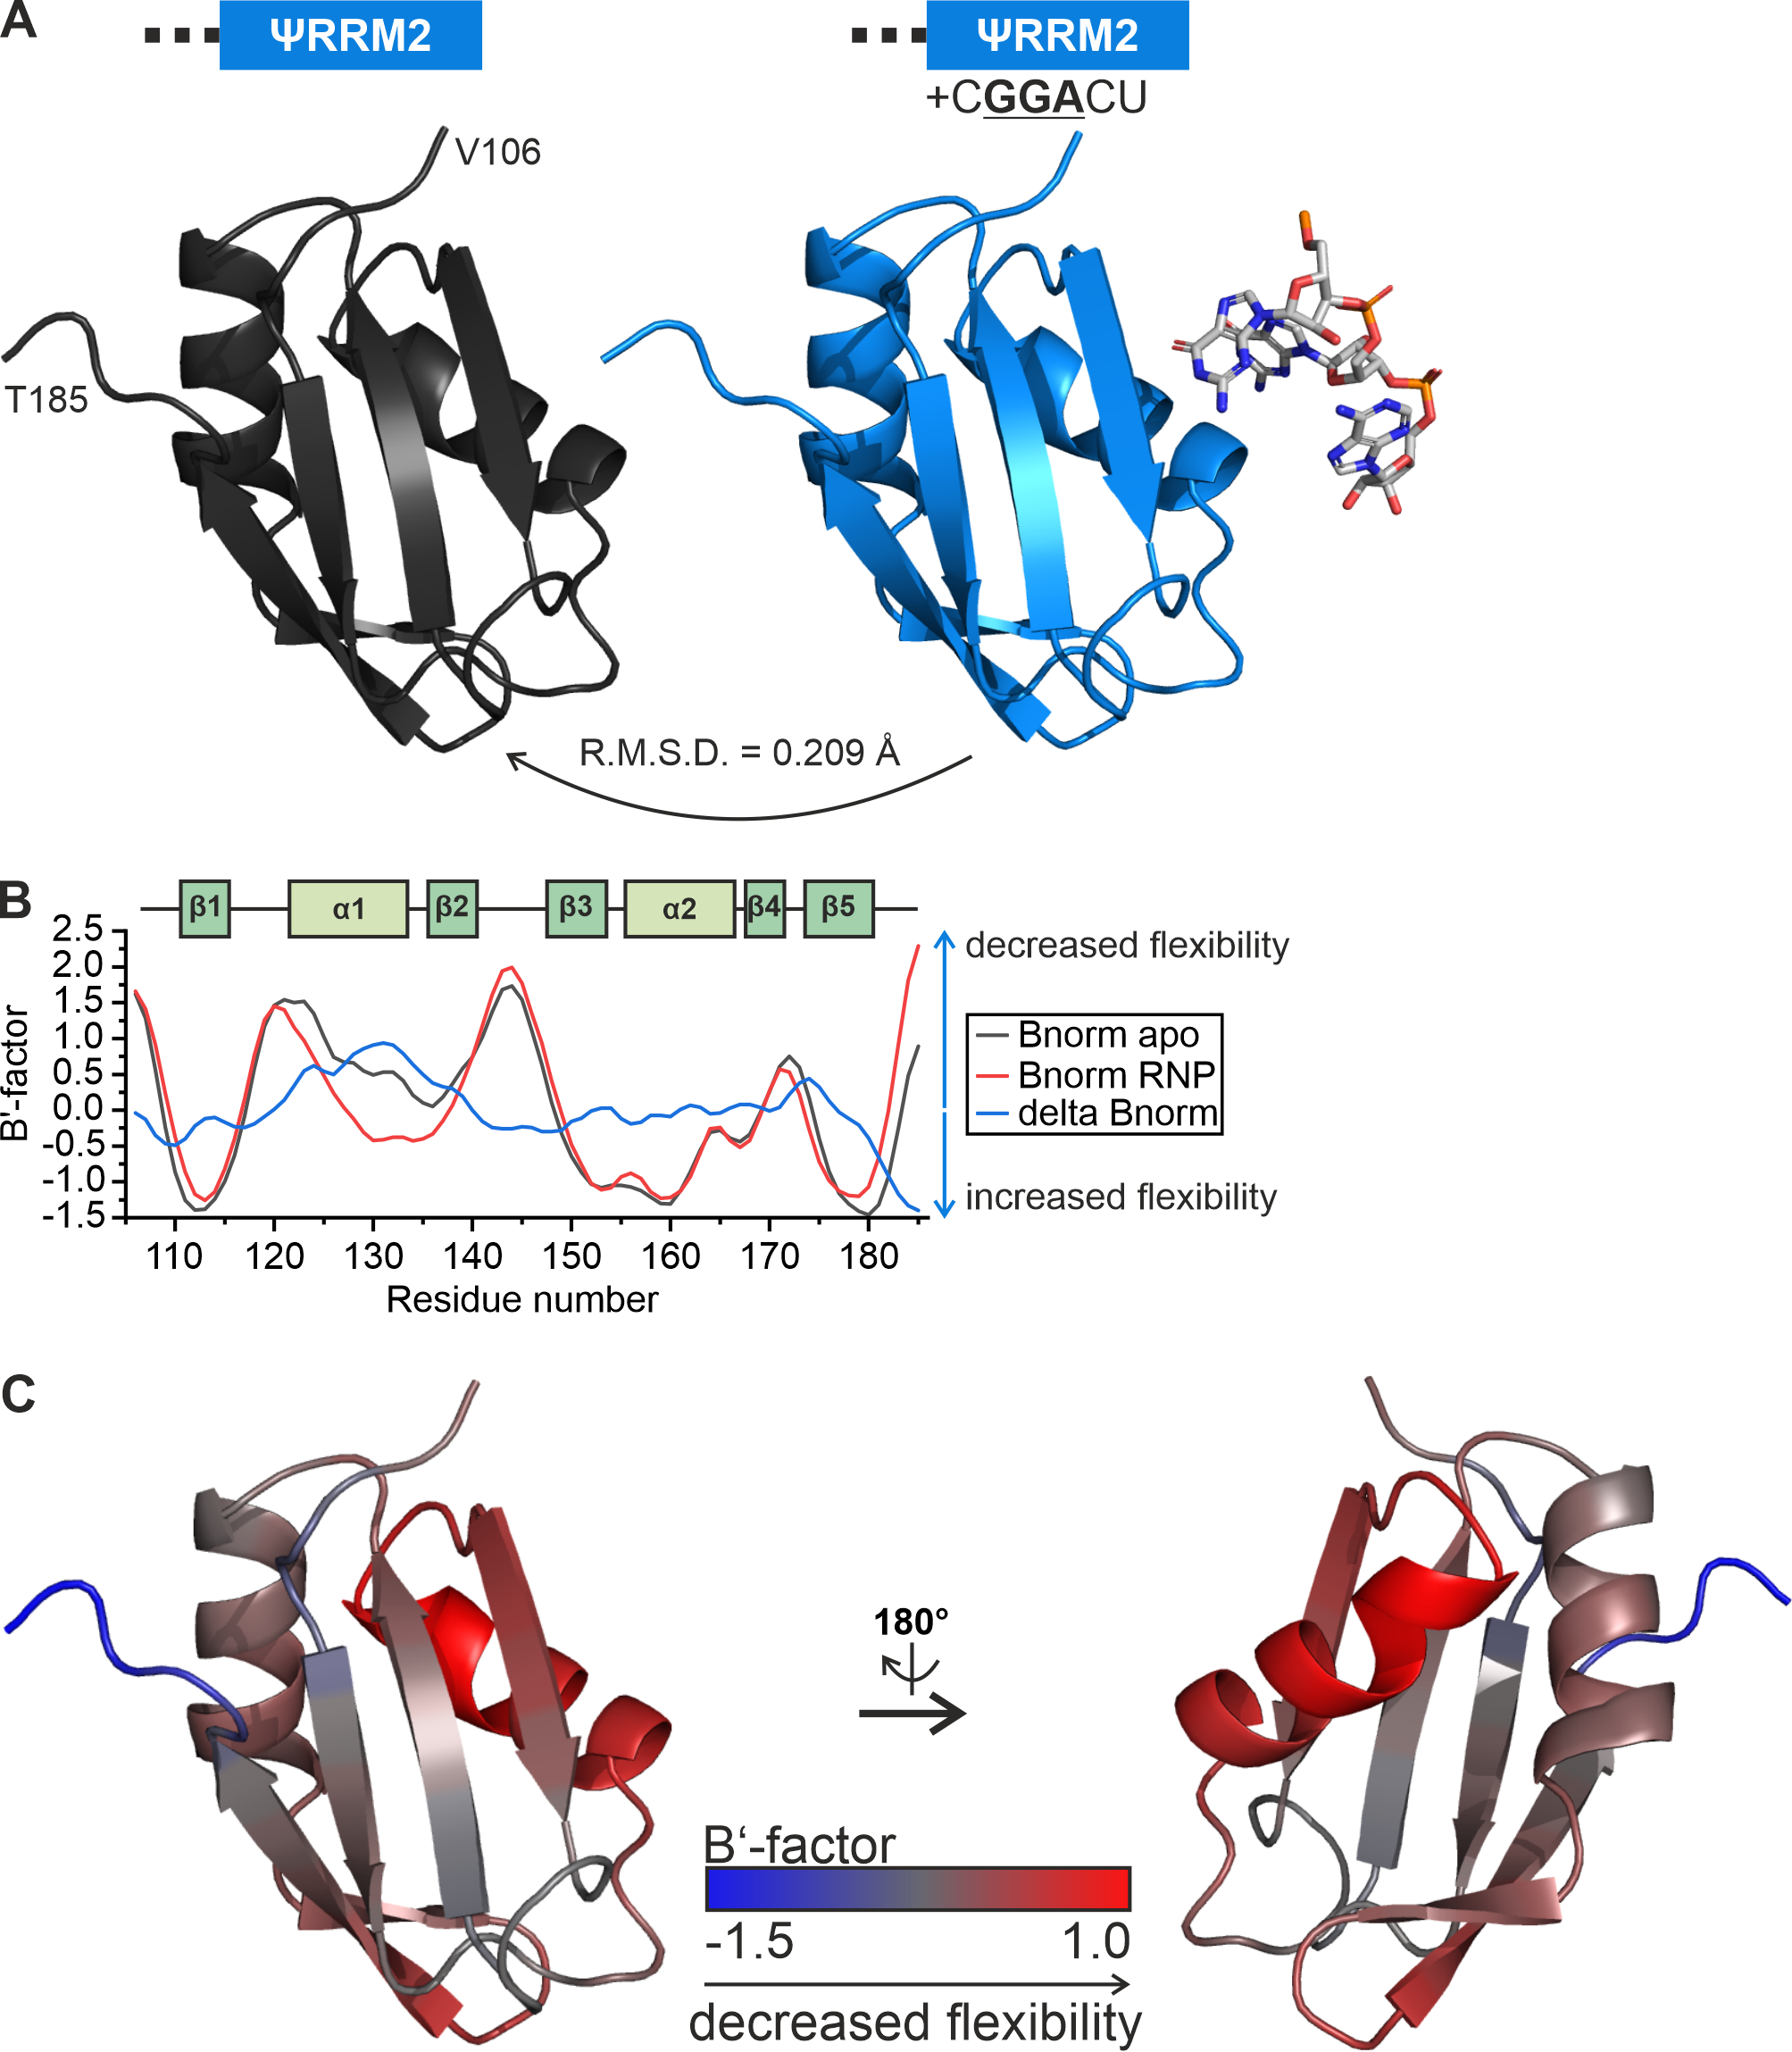


Supplementary Figure : Comparison of SRSF6 ΨRRM2 apo and RNP structure.

A: Alignment and comparison of the SRSF6 ΨRRM2 apo structure with the structure in complex with CGGACU RNA. B: Comparison of B-factors from the crystal structures in A. The comparison has been performed using BANΔIT 2. Secondary structure elements from the crystal structure are shown at the top for comparison. C: Change in B-factor (delta Bnorm from B) between the apo and complex structure plotted on the apo protein. Red indicates decreased flexibility and blue an increase in flexibility.


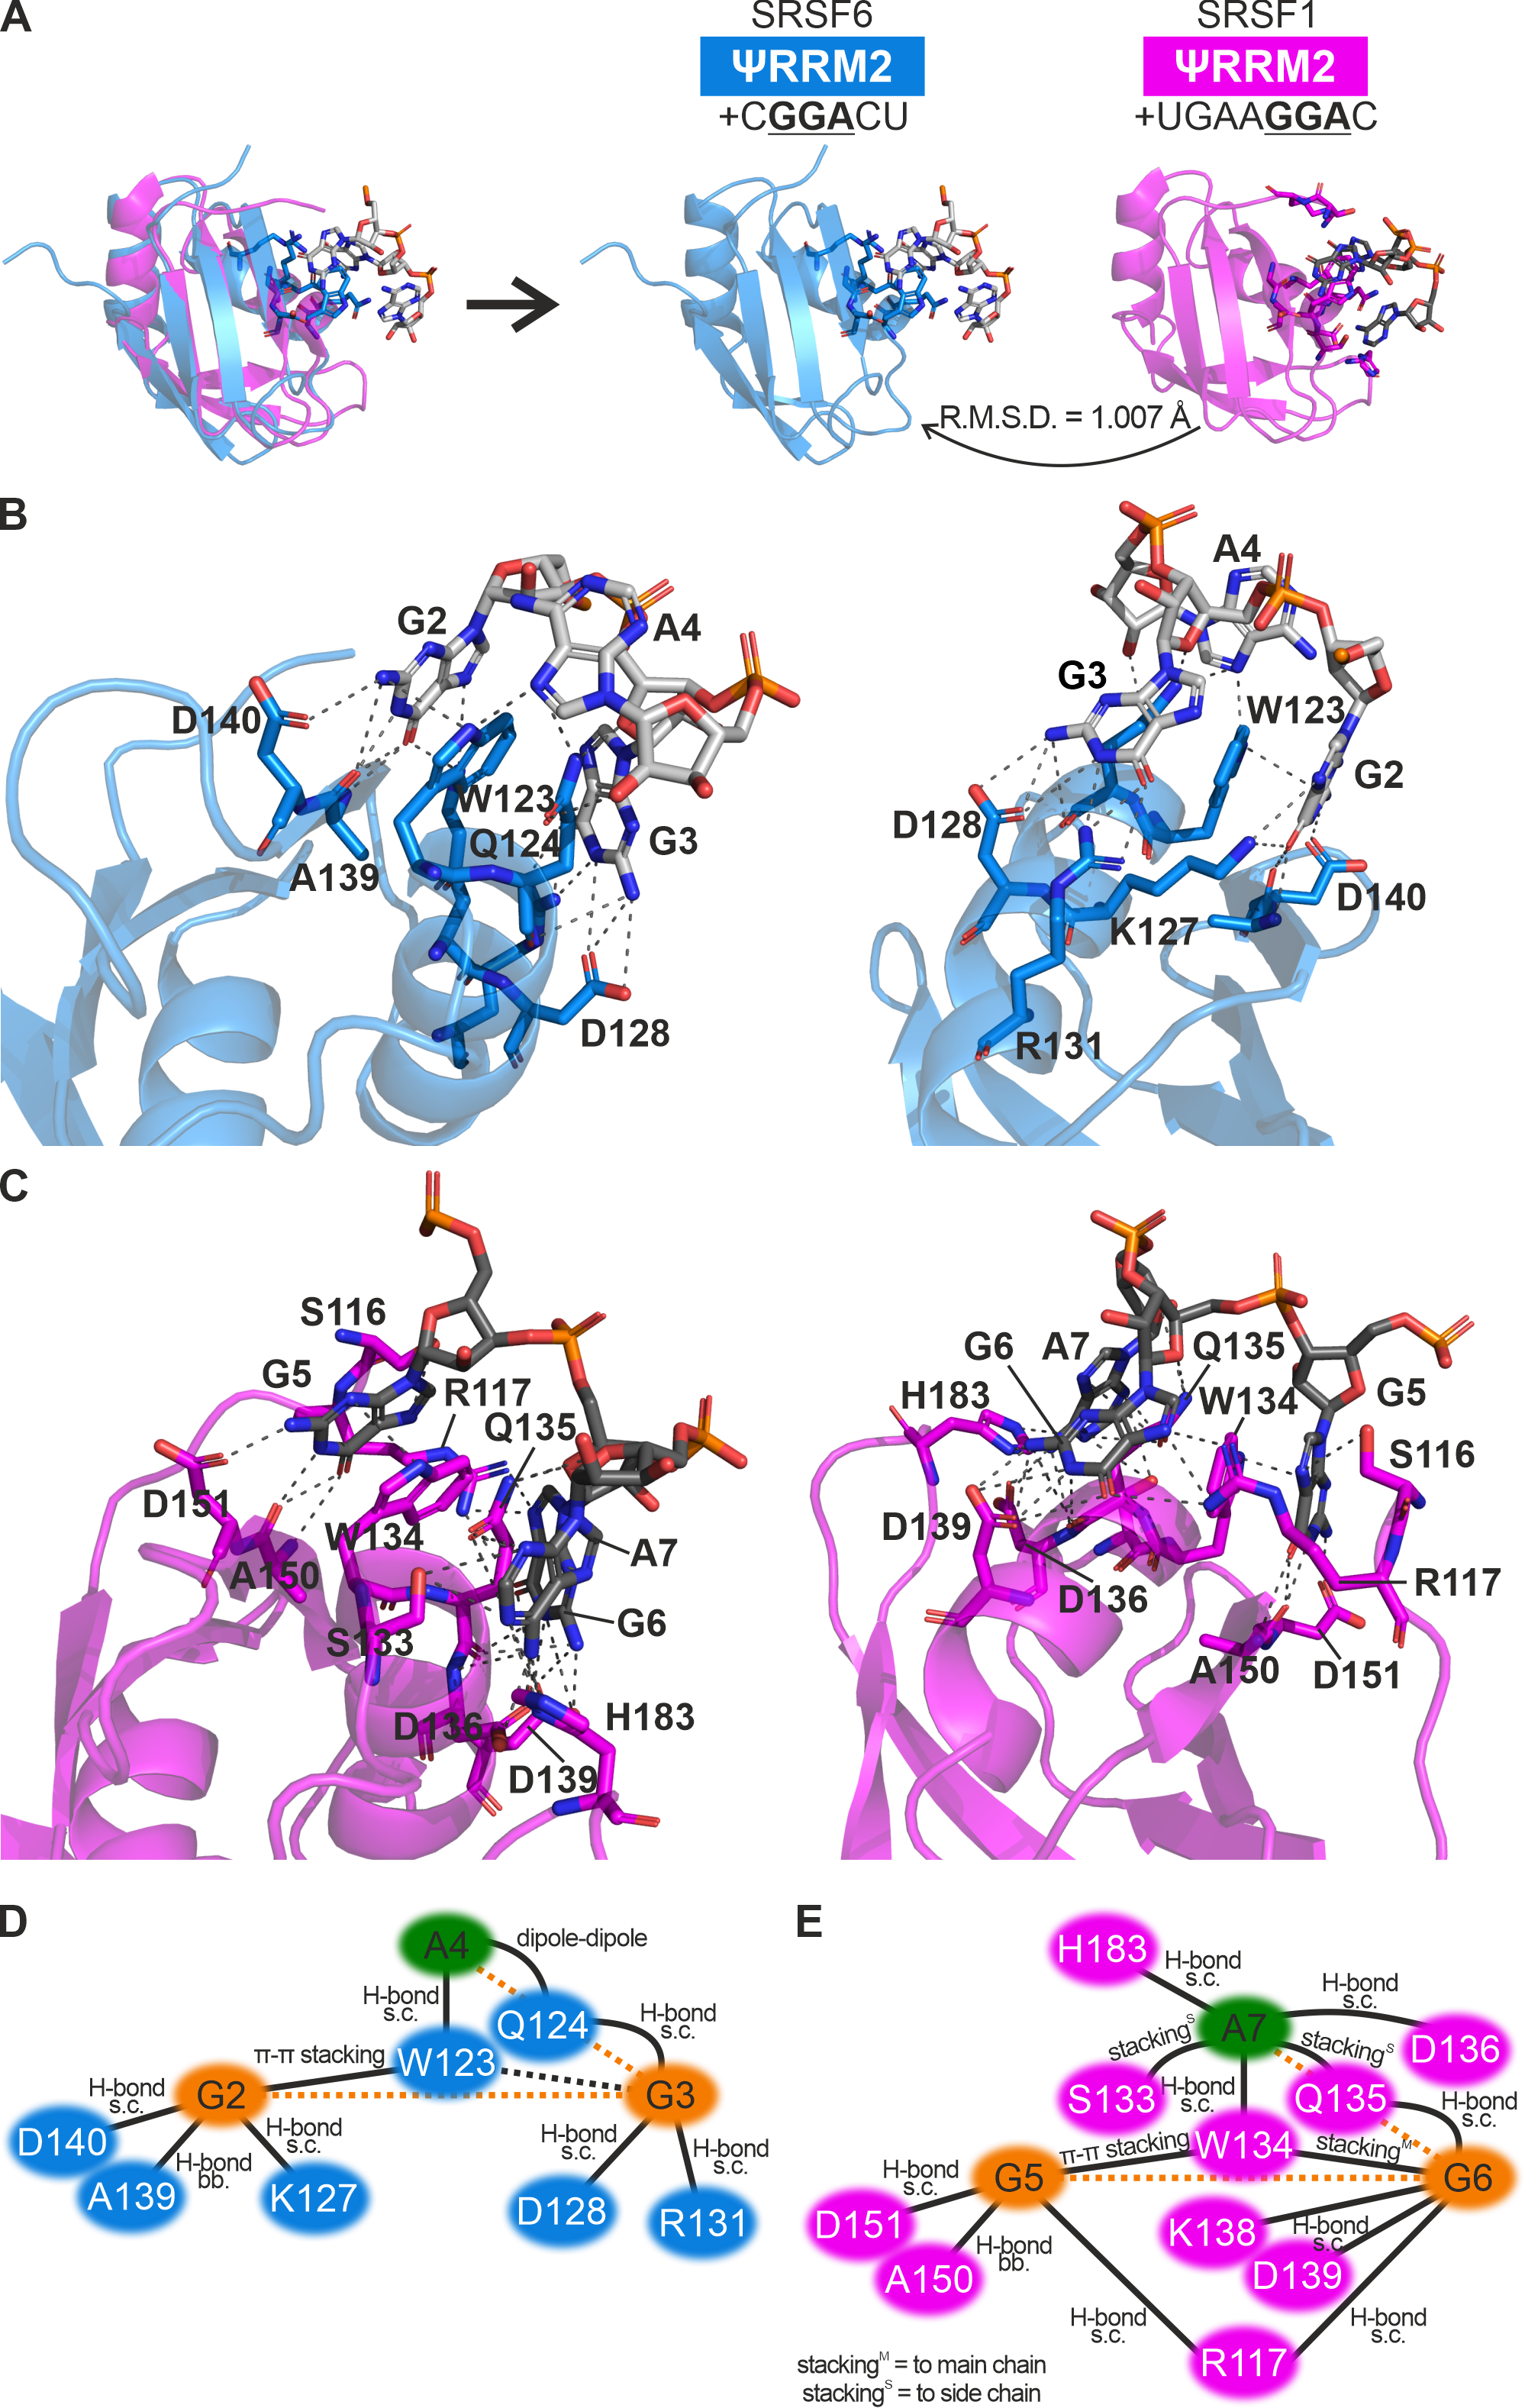


Supplementary Figure : Comparison of SRSF1 and SRSF6 ΨRRM2 in complex with RNA.

A: Direct alignment of SRSF1 and SRSF6 ΨRRM2 in complex with UGAAGGAC and CGGACU RNA, respectively. B: Zoom-ins on the SRSF6 ΨRRM2 structure in complex with CGGACU RNA as shown in Fig. 3B/C. C: Zoom-ins on the SRSF1 ΨRRM2 in complex with UGAAGGAC RNA. D: Contact map of SRSF6 ΨRRM2 in complex with CGGACU RNA. E: Contact map of SRSF1 ΨRRM2 in complex with UGAAGGAC RNA.


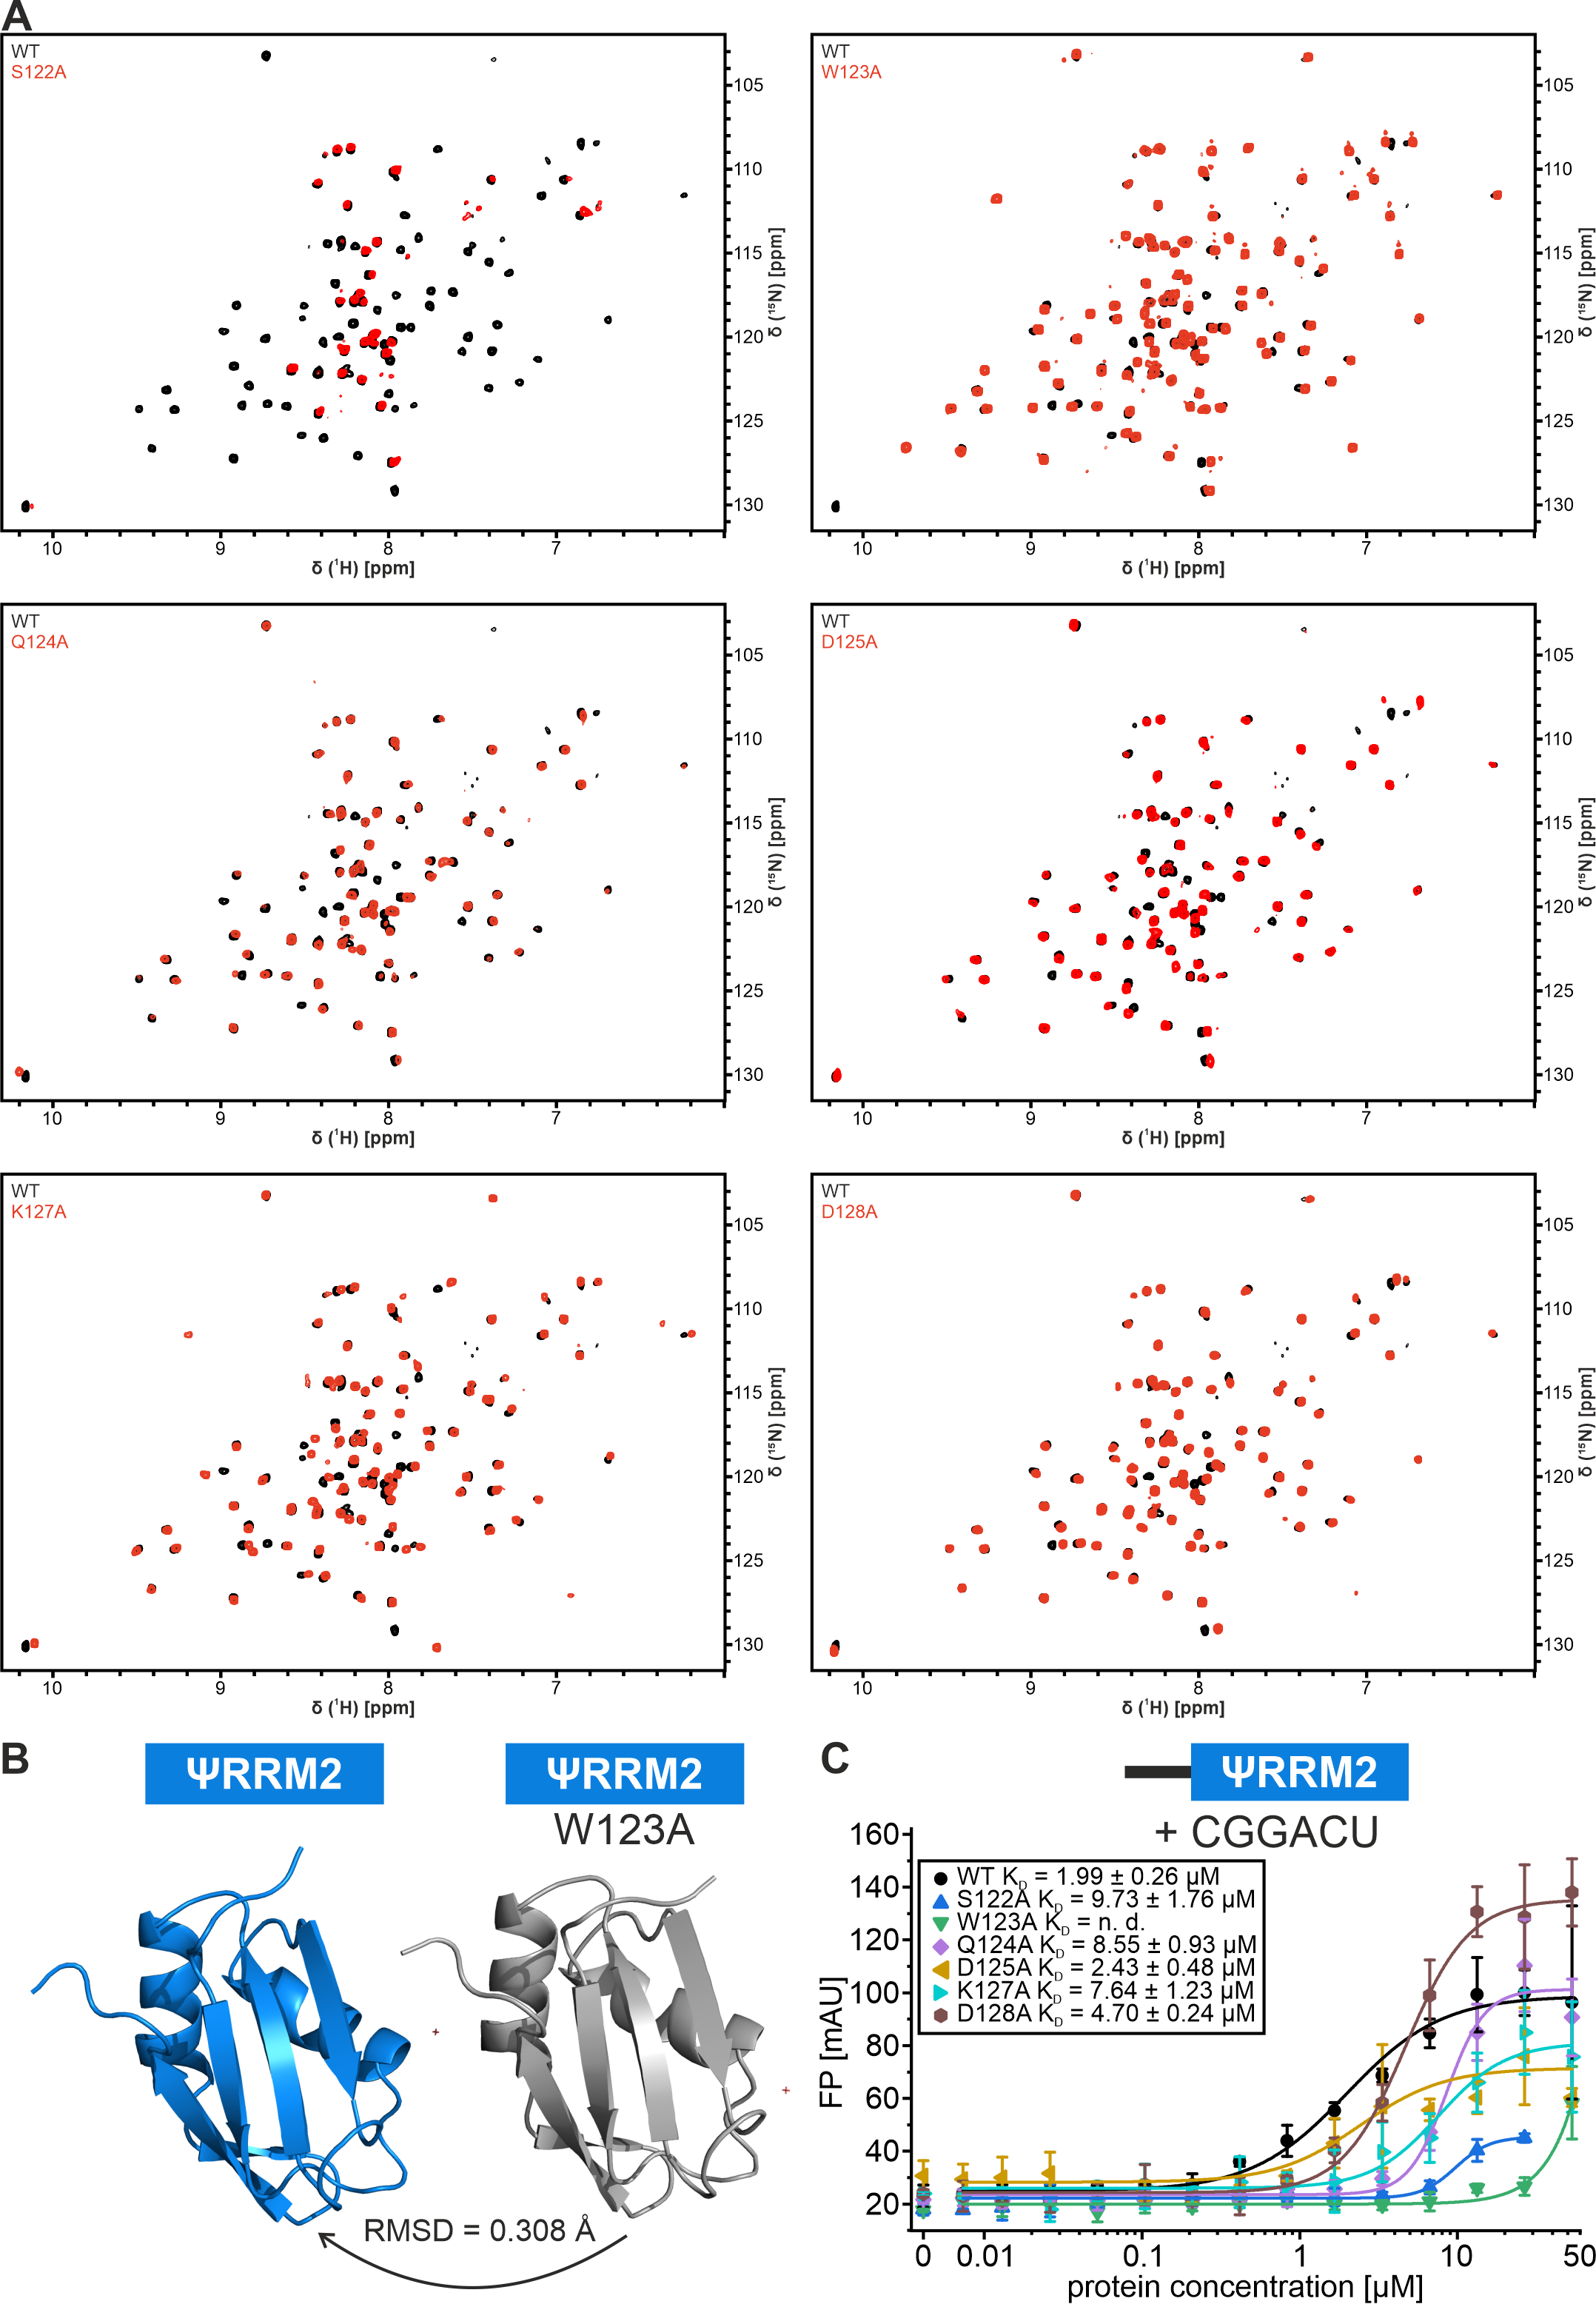


Supplementary Figure : Comparisons of ΨRRM2 WT and mutants.

A: 1H-15N-HSQC comparison of ΨRRM2 WT and mutants. B: Comparison of the ΨRRM2 WT and W123A crystal structure. The RMSD between backbone atoms is given at the bottom. C: FP measurements of ΨRRM2 mutants with CGGACU RNA.


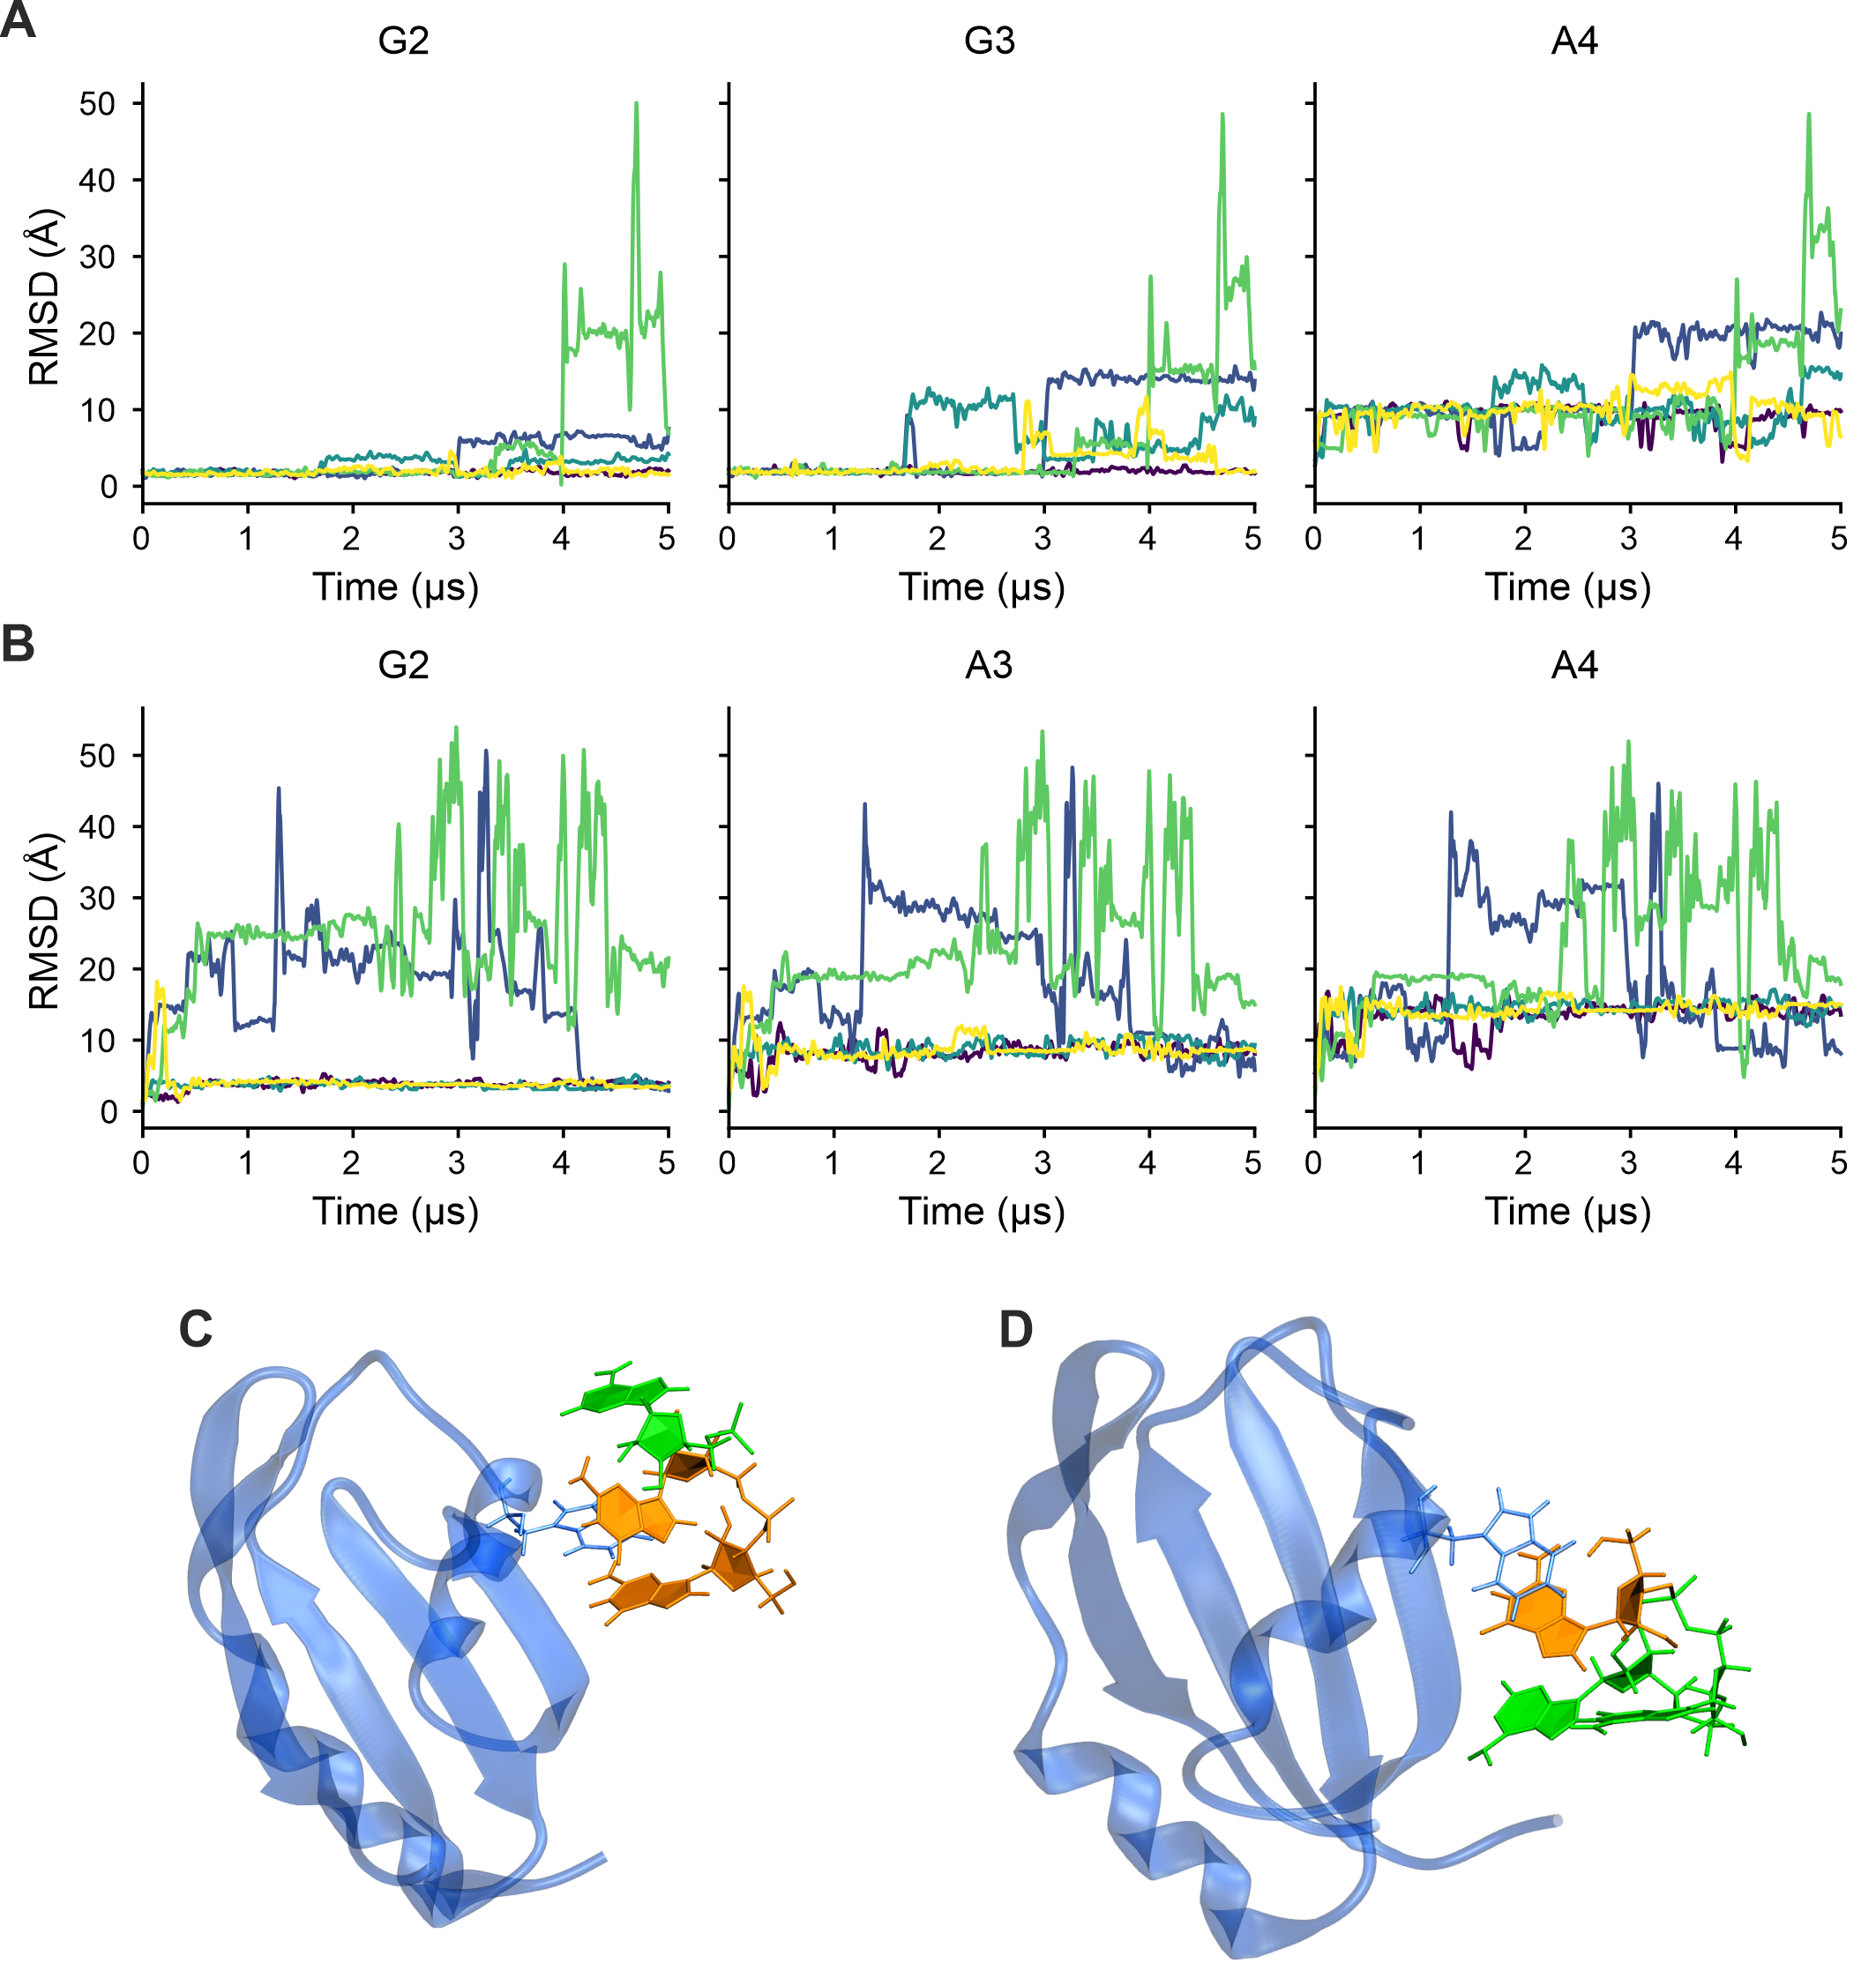


Supplementary Figure : RNA RMSDs from simulations of SRSF6 ΨRRM2 in complex with GGA (A/C) and GAA (B/D) RNA.

A/B: RMSDs were calculated after alignment of protein and RNA heavy atoms. Each plot shows the RMSD for a single RNA residue, with colors indicating individual replicas. For the GGA RNA in two of the five replicas, the RNA reoriented: G3 flipped, allowing its O6 atom to engage with the guanidinium group of R131. This rearrangement did not preserve the initial binding pose. C/D: Time-averaged structures of SRSF6 ΨRRM2 in complex with GGA (C) or GAA (D) RNA from MD simulations. Guanines and adenines are depicted orange and green, respectively. From the protein, the W123 sidechain is highlighted in stick representation.


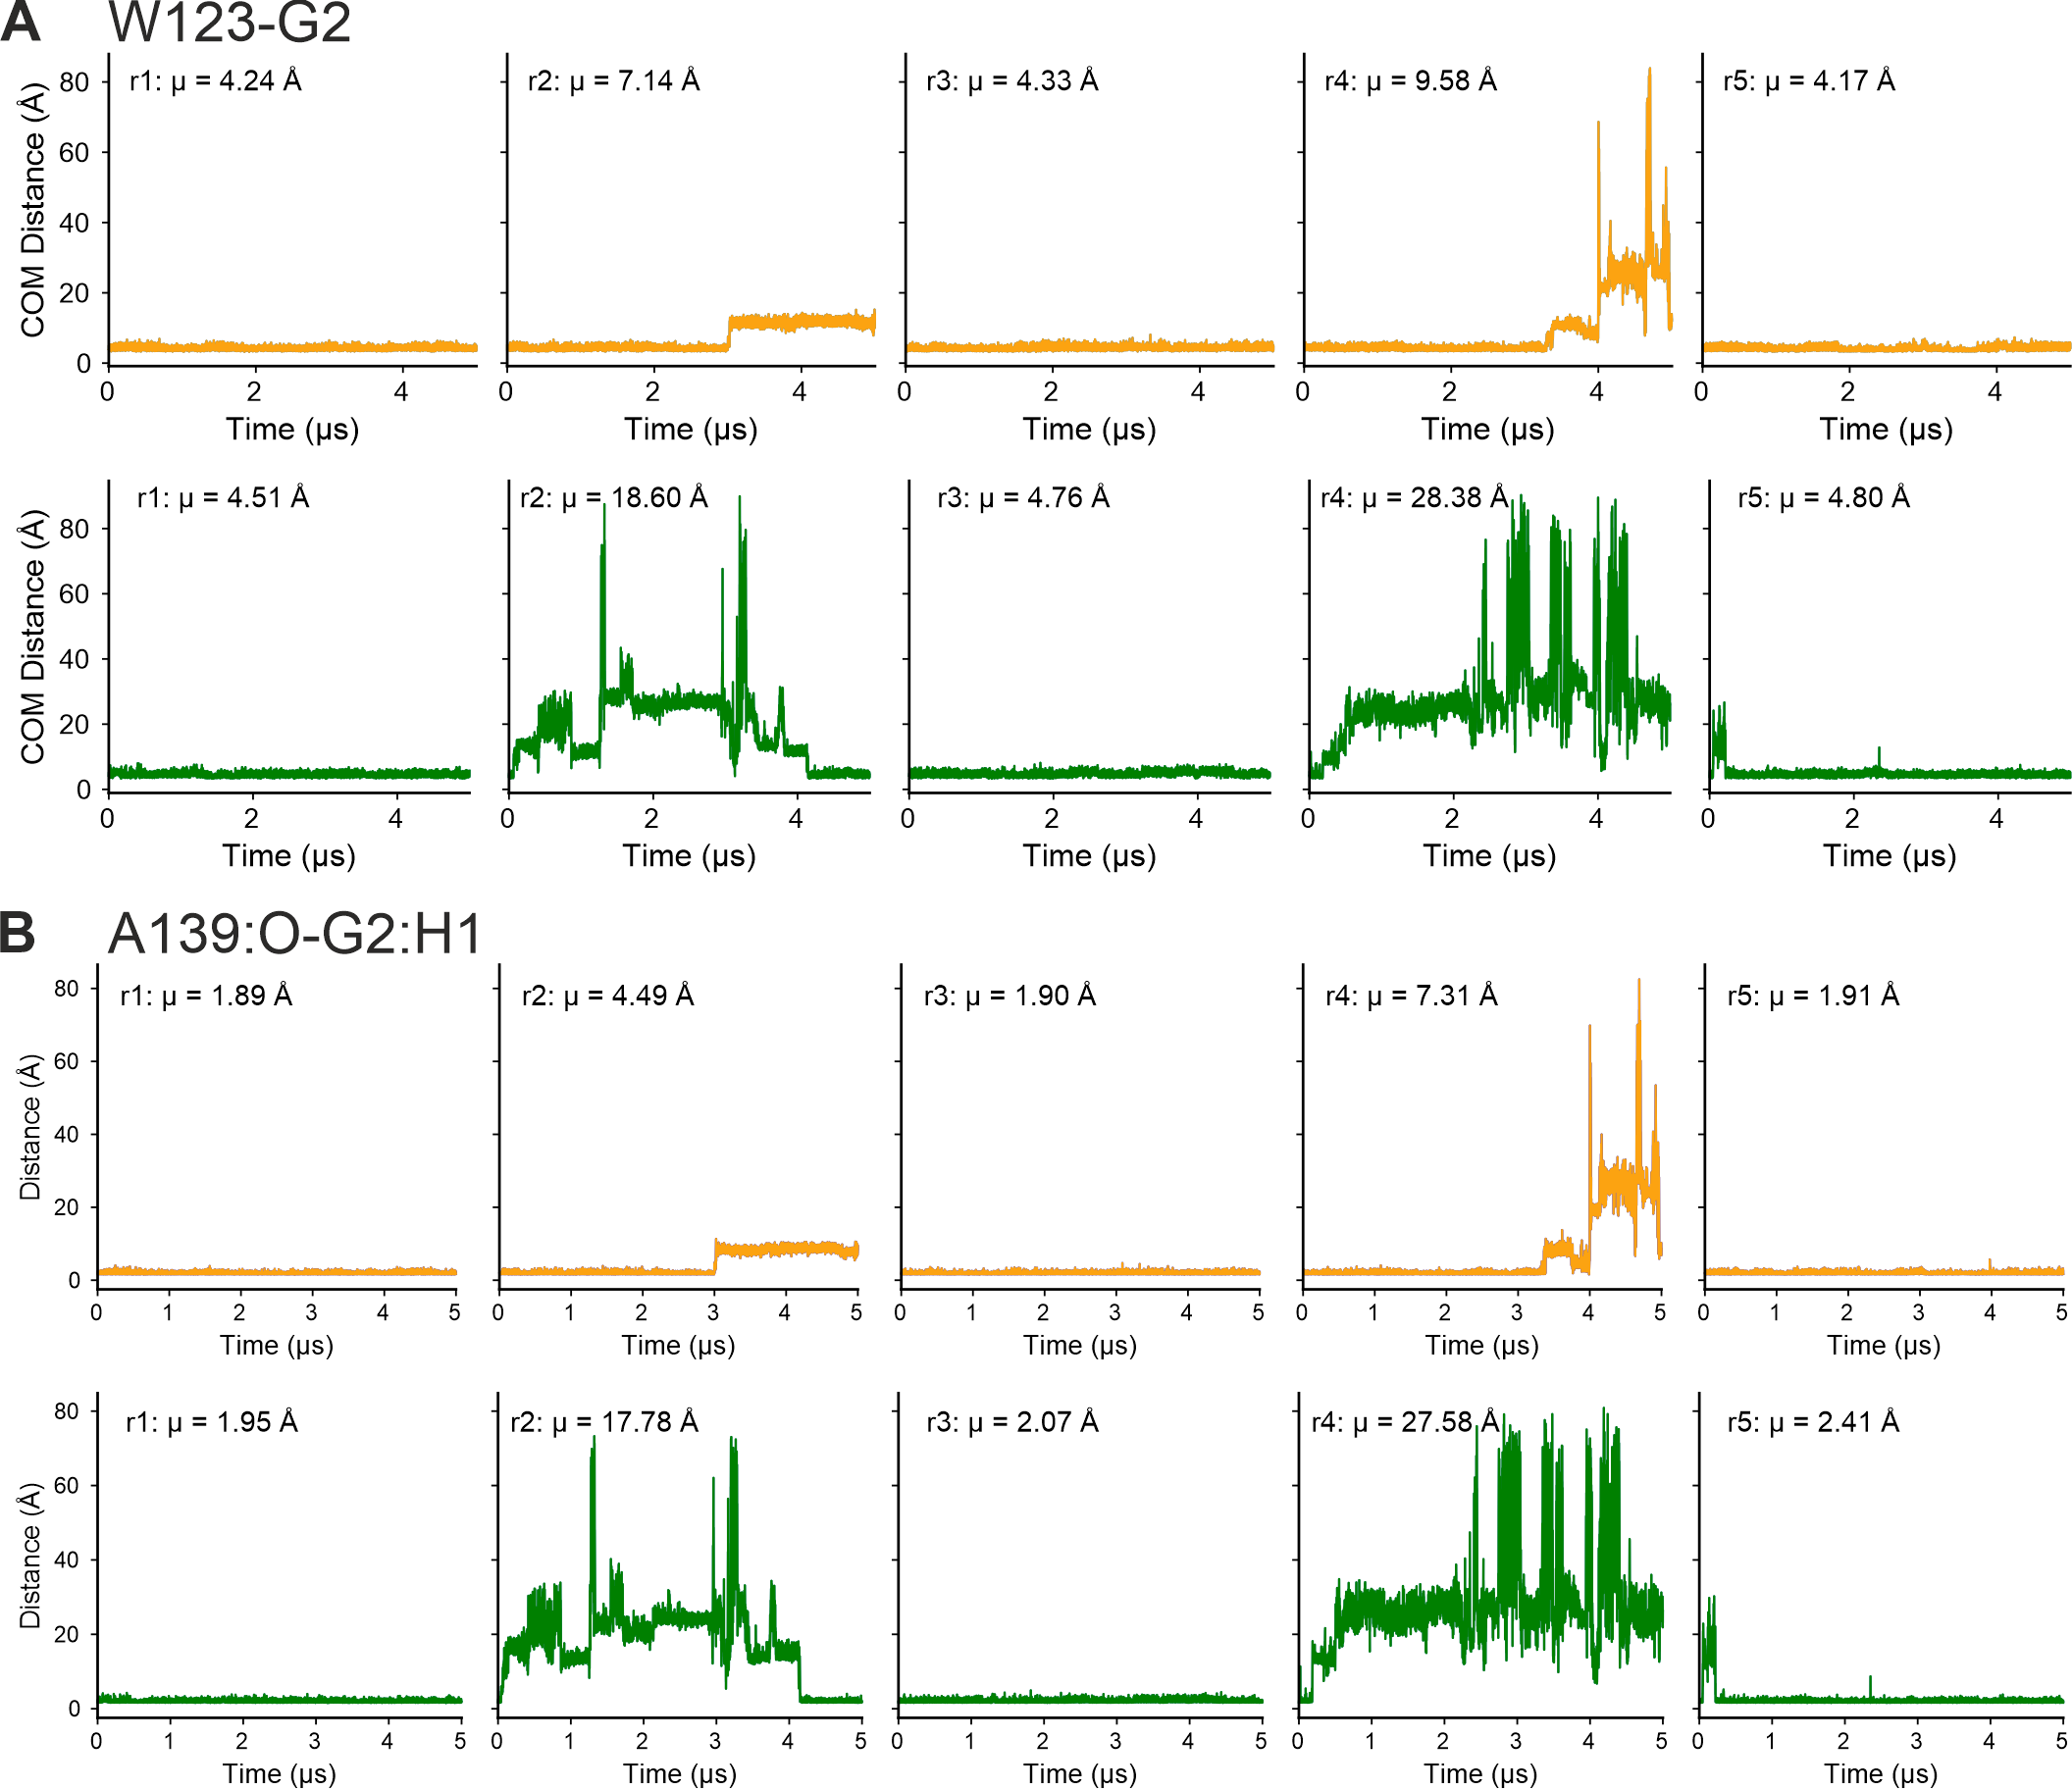


Supplementary Figure : Distance measurements of SRSF6 ΨRRM2 residues with GGA (orange and GAA (green) RNA.

A: Center of mass distances of Tryptophan 123 with Guanine 2 from simulations of SRSF6 ΨRRM2 with GGA (top) and GAA (bottom) RNA. Mean values are given for each replica. B: Distances measurements of Alanine 139:O with Guanine 2:H1 from simulations of SRSF6 ΨRRM2 with GGA (top) and GAA (bottom) RNA. Mean values are given for each replica.


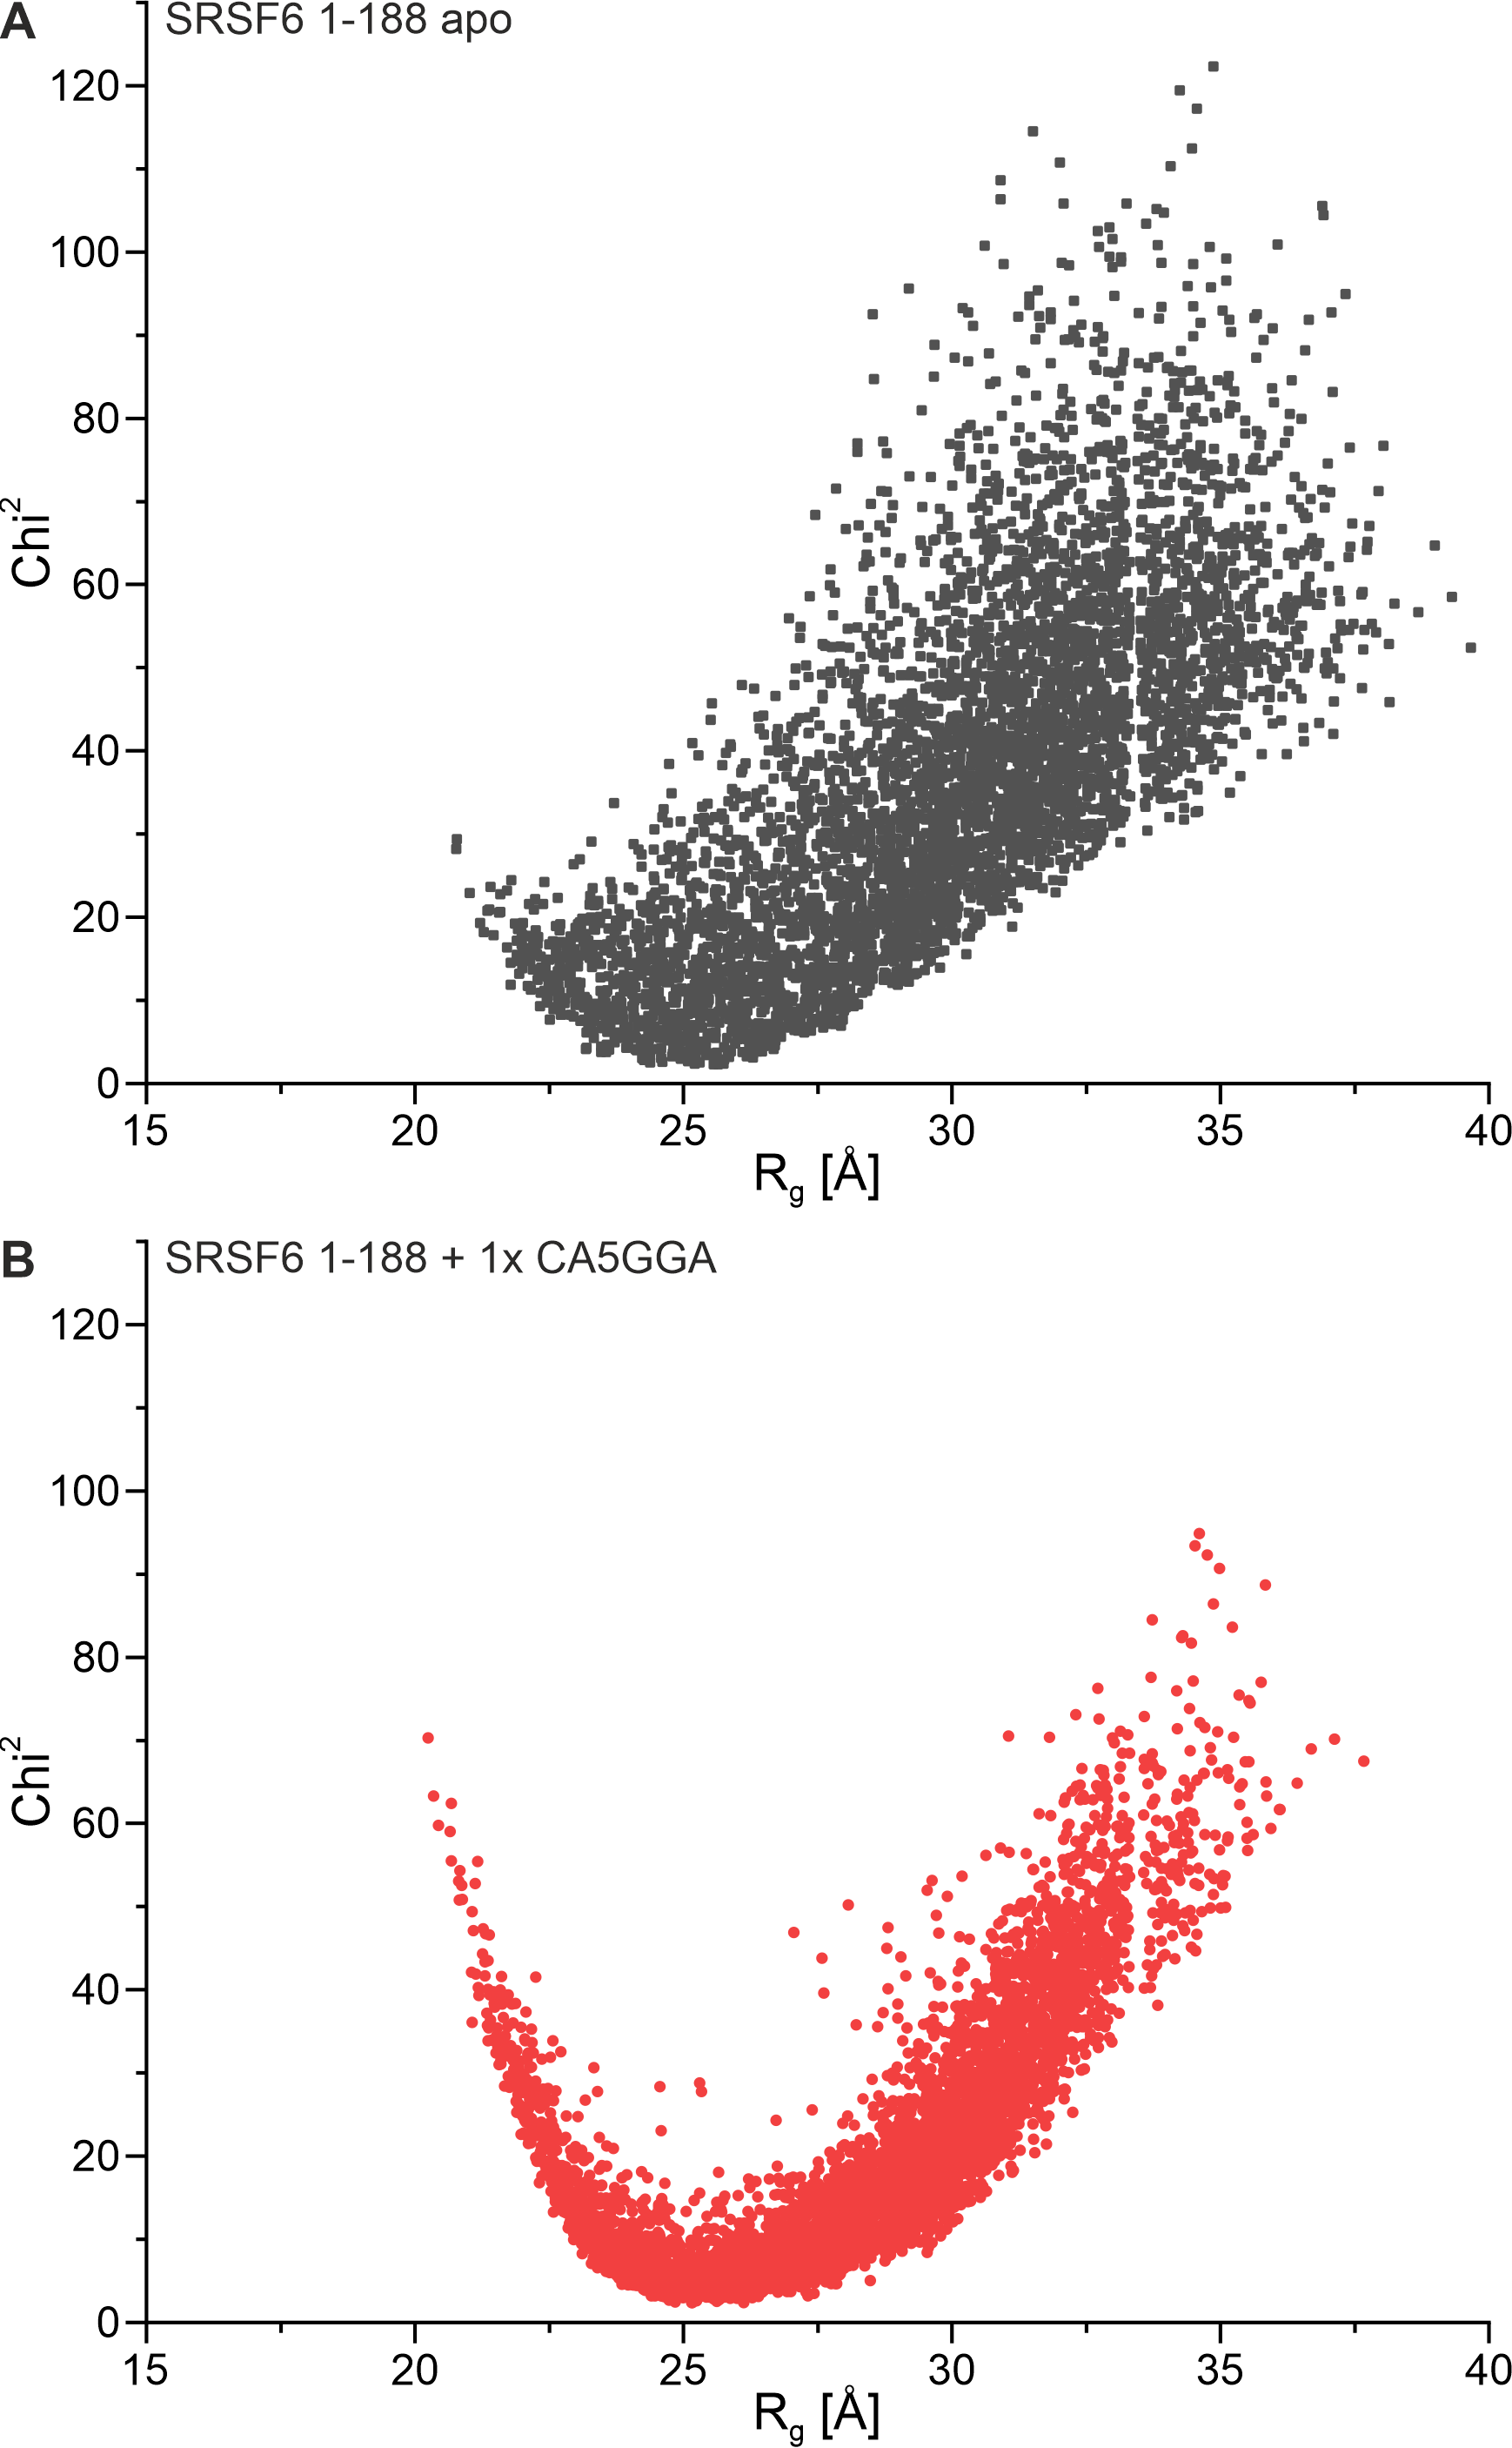


Supplementary Figure : Scatter plots of the 5000 models used for SAXS filtering.
Scatter plot for tandem RRM apo (1-188, A) and in complex with CA5GGA RNA (B), showing the distribution of Rg of each model and how well the single models fit to the SAXS data (Chi2).


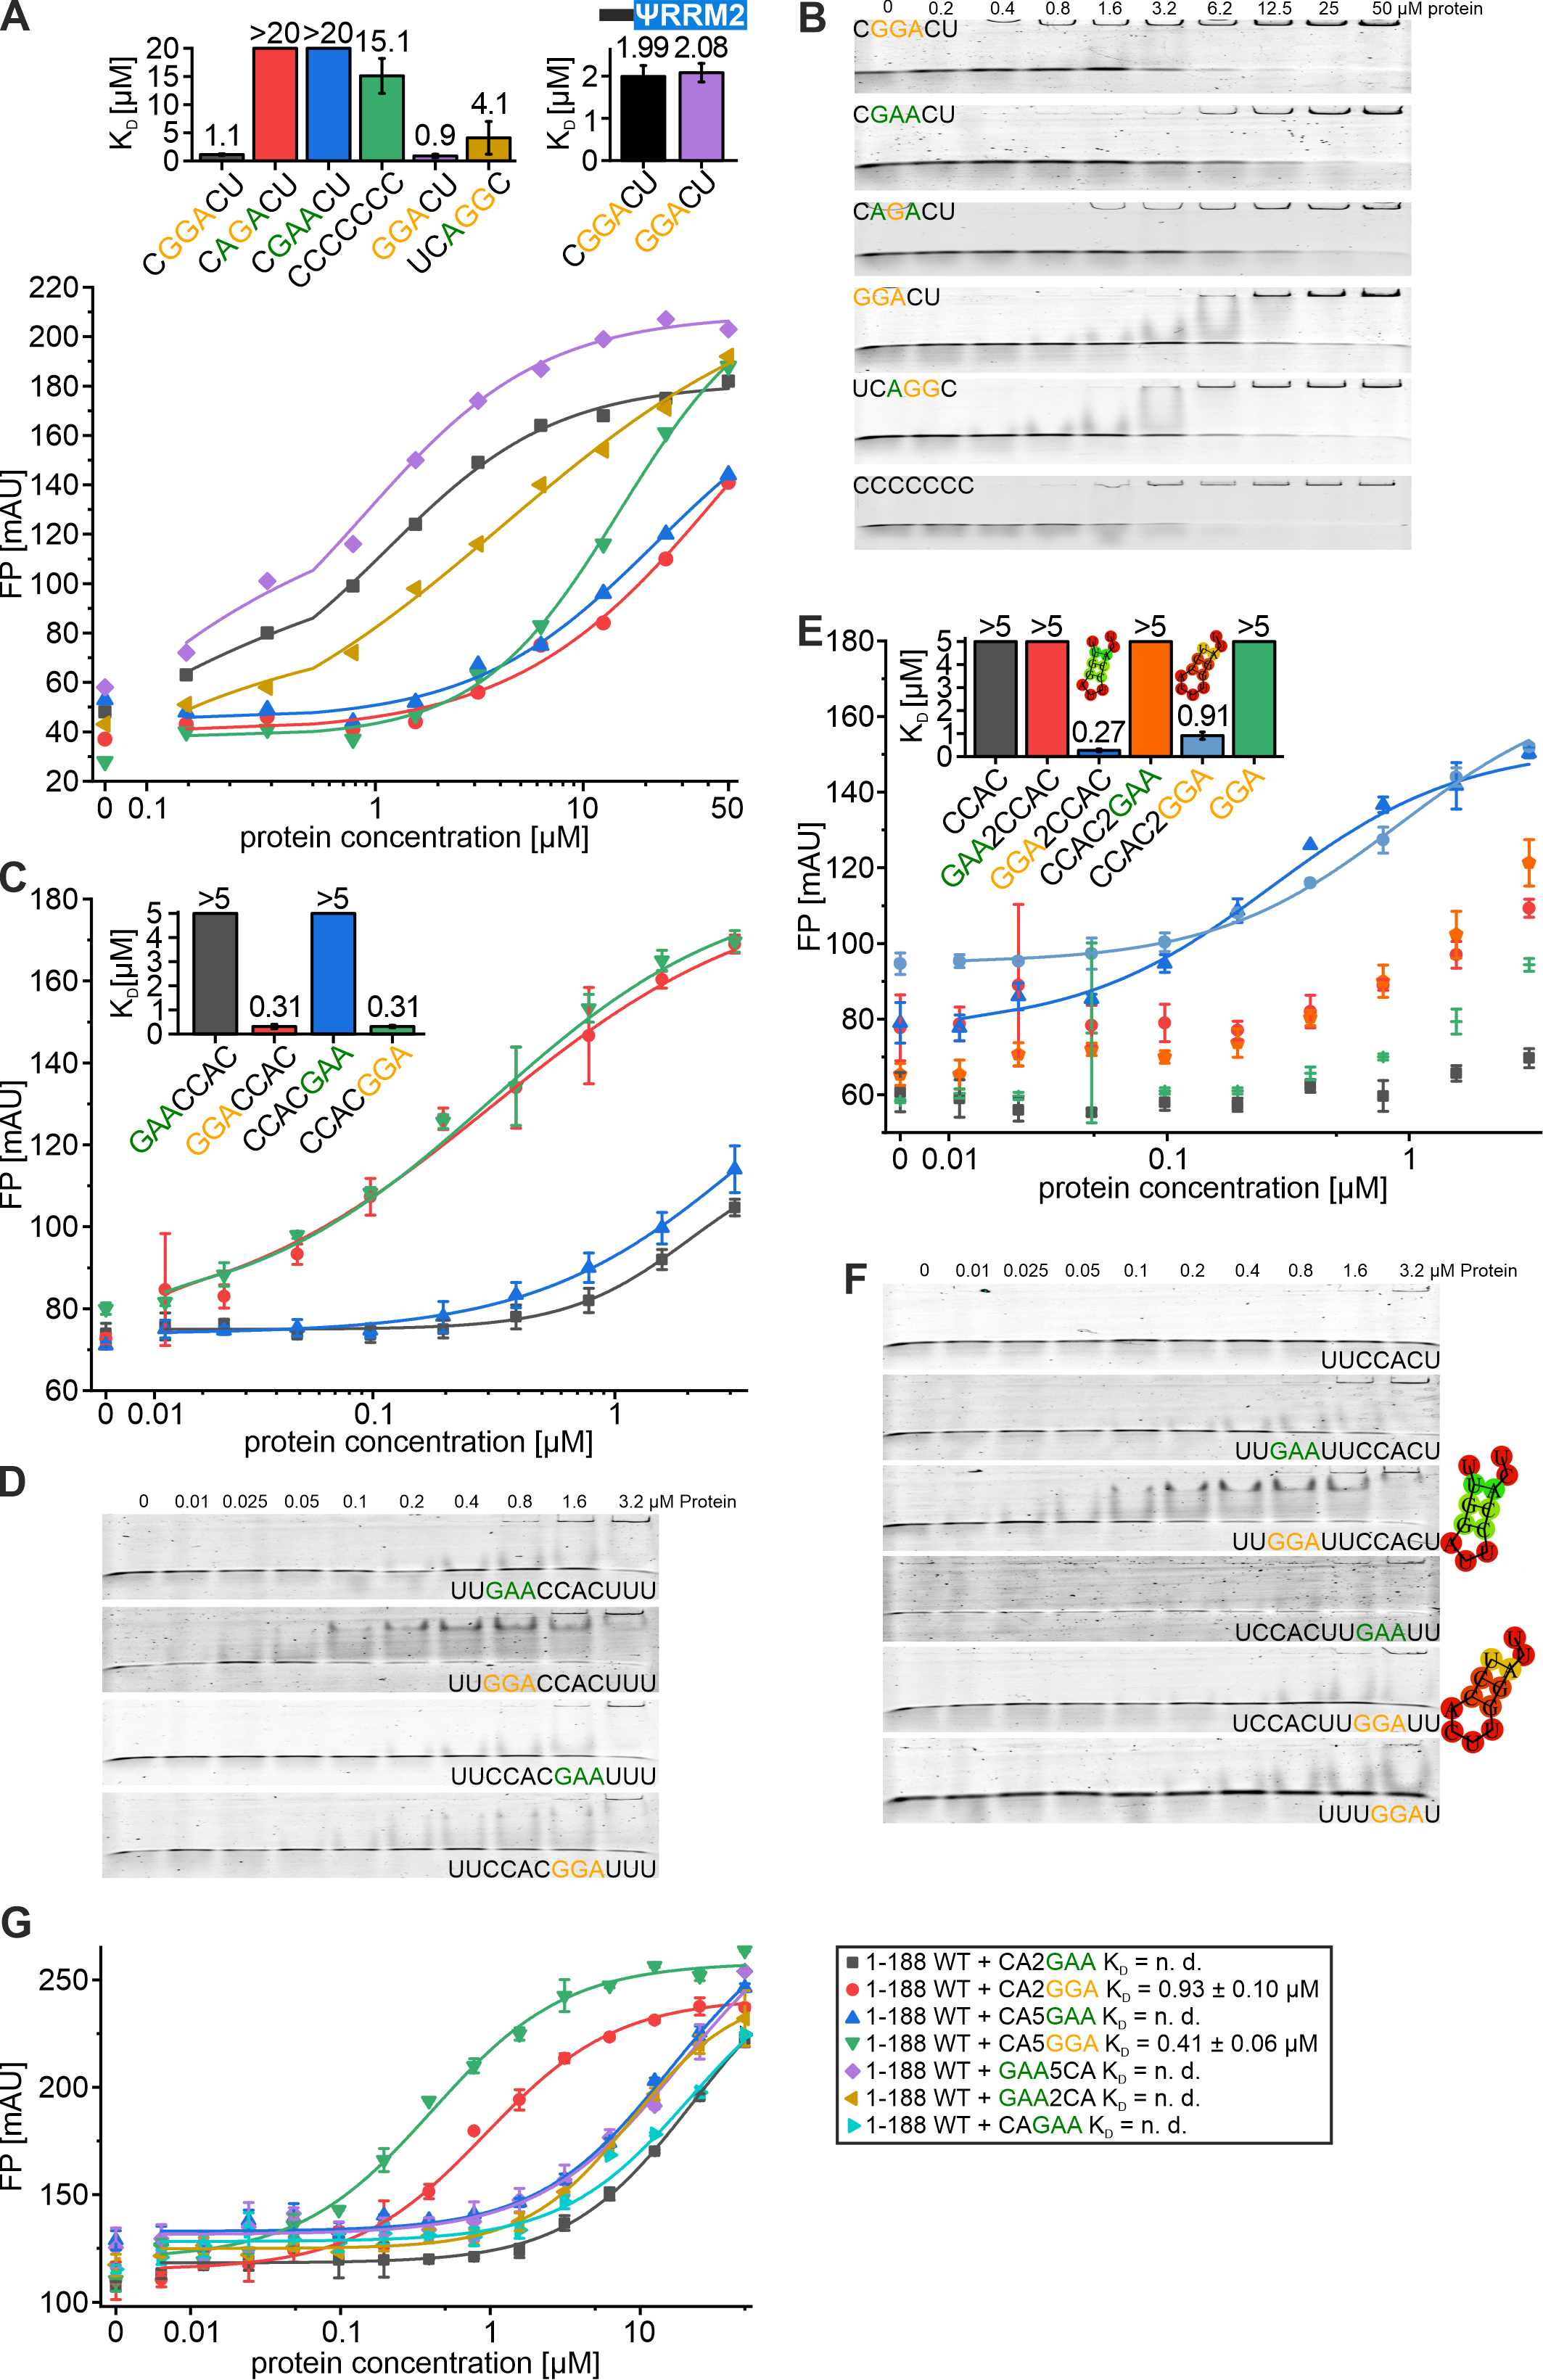


Supplementary Figure : Protein-RNA interactions of SRSF6 RRM1-2 as observed by FP and EMSA.

A: FP curves and fits of SRSF6 tandem RRM (1-188) binding to 5-7-mer RNAs. Obtained affinities are plotted as a bar chart. Affinity plot for ΨRRM2 for CGGACU and GGACU RNA is taken from Supplementary Figure 12 for reference. B: Representative EMSAs corresponding to A. C: FP curves and fits of SRSF6 tandem RRM (1-188) binding to 12-mer RNAs with inverted motifs for RRM1/ΨRRM2 RNA recognition. Obtained affinities are plotted as a bar chart. D: Representative EMSAs corresponding to C. E: FP curves and fits of SRSF6 tandem RRM (1-188) binding to 12-mer RNAs with inverted motifs for RRM1/ ΨRRM2 RNA recognition as well as single RRM preference motifs (CCAC and GGA RNA). Obtained affinities are plotted as a bar chart. Secondary structure icons are shown for RNAs that have been predicted to potentially form base pairing. F: Representative EMSAs corresponding to E. G: FP curves and fits of SRSF6 tandem RRM (1-188) binding to 12-mer RNAs with CA (RRM1) and GGA/GAA (ΨRRM2) motifs.


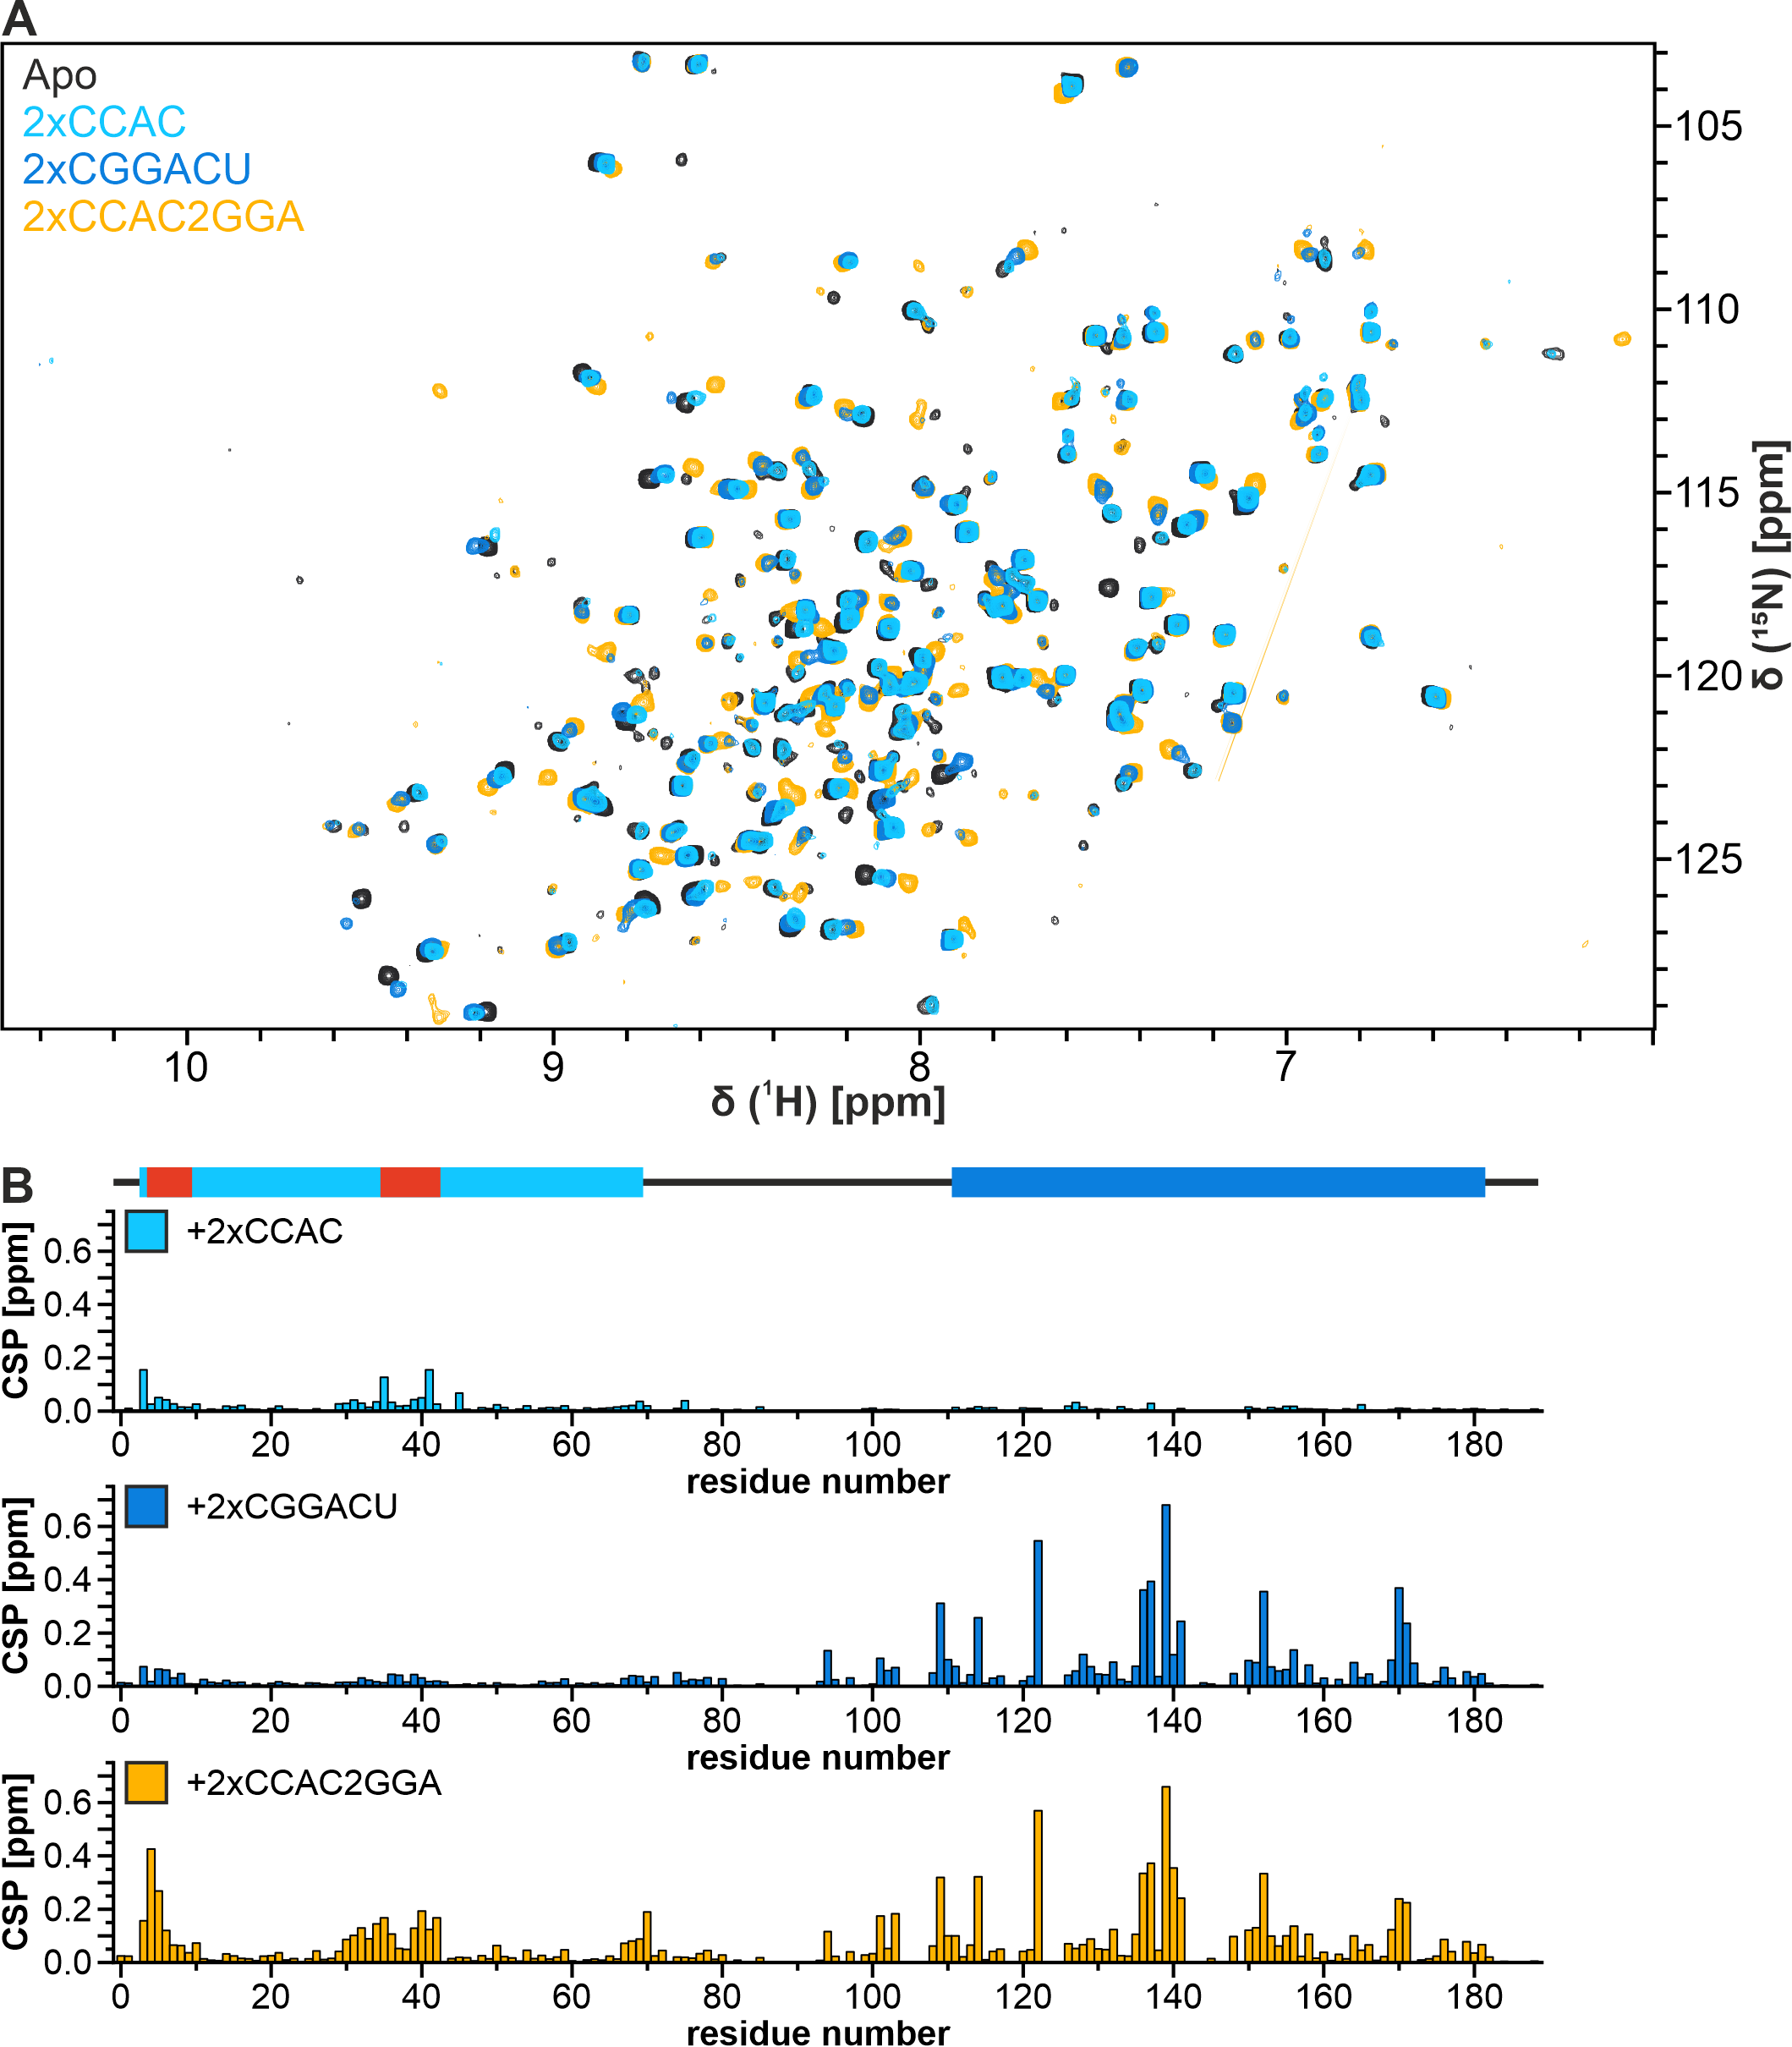


Supplementary Figure : SRSF6 Tandem RRM-RNA interaction with three different RNAs.

A: 1H-15N-HSQC spectra of the tandem RRM alone and in presence of 2-fold molar excess of three different RNAs as indicated in top left corner. Spectra were recorded at a 1H-Larmor frequency of 950 MHz at a protein concentration of 100 µM (apo/+2xCCAC2GGA-RNA), 40 µM (+2xCGGACU-RNA) or 25 µM (+2xCCAC-RNA) in buffer containing 20 mM NaPi, 150 mM NaCl, 380 mM l-R/E, 2 mM TCEP, 0.02 % NaN3, 100 µM DSS and 7 % D2O at pH 7.0 and 310K. B: 1H-15N-combined chemical shift perturbation plot of tandem RRM upon addition of 2-fold molar excess of CCAC, CGGACU and CCAC2GGA RNA as indicated in top left corner of each panel.


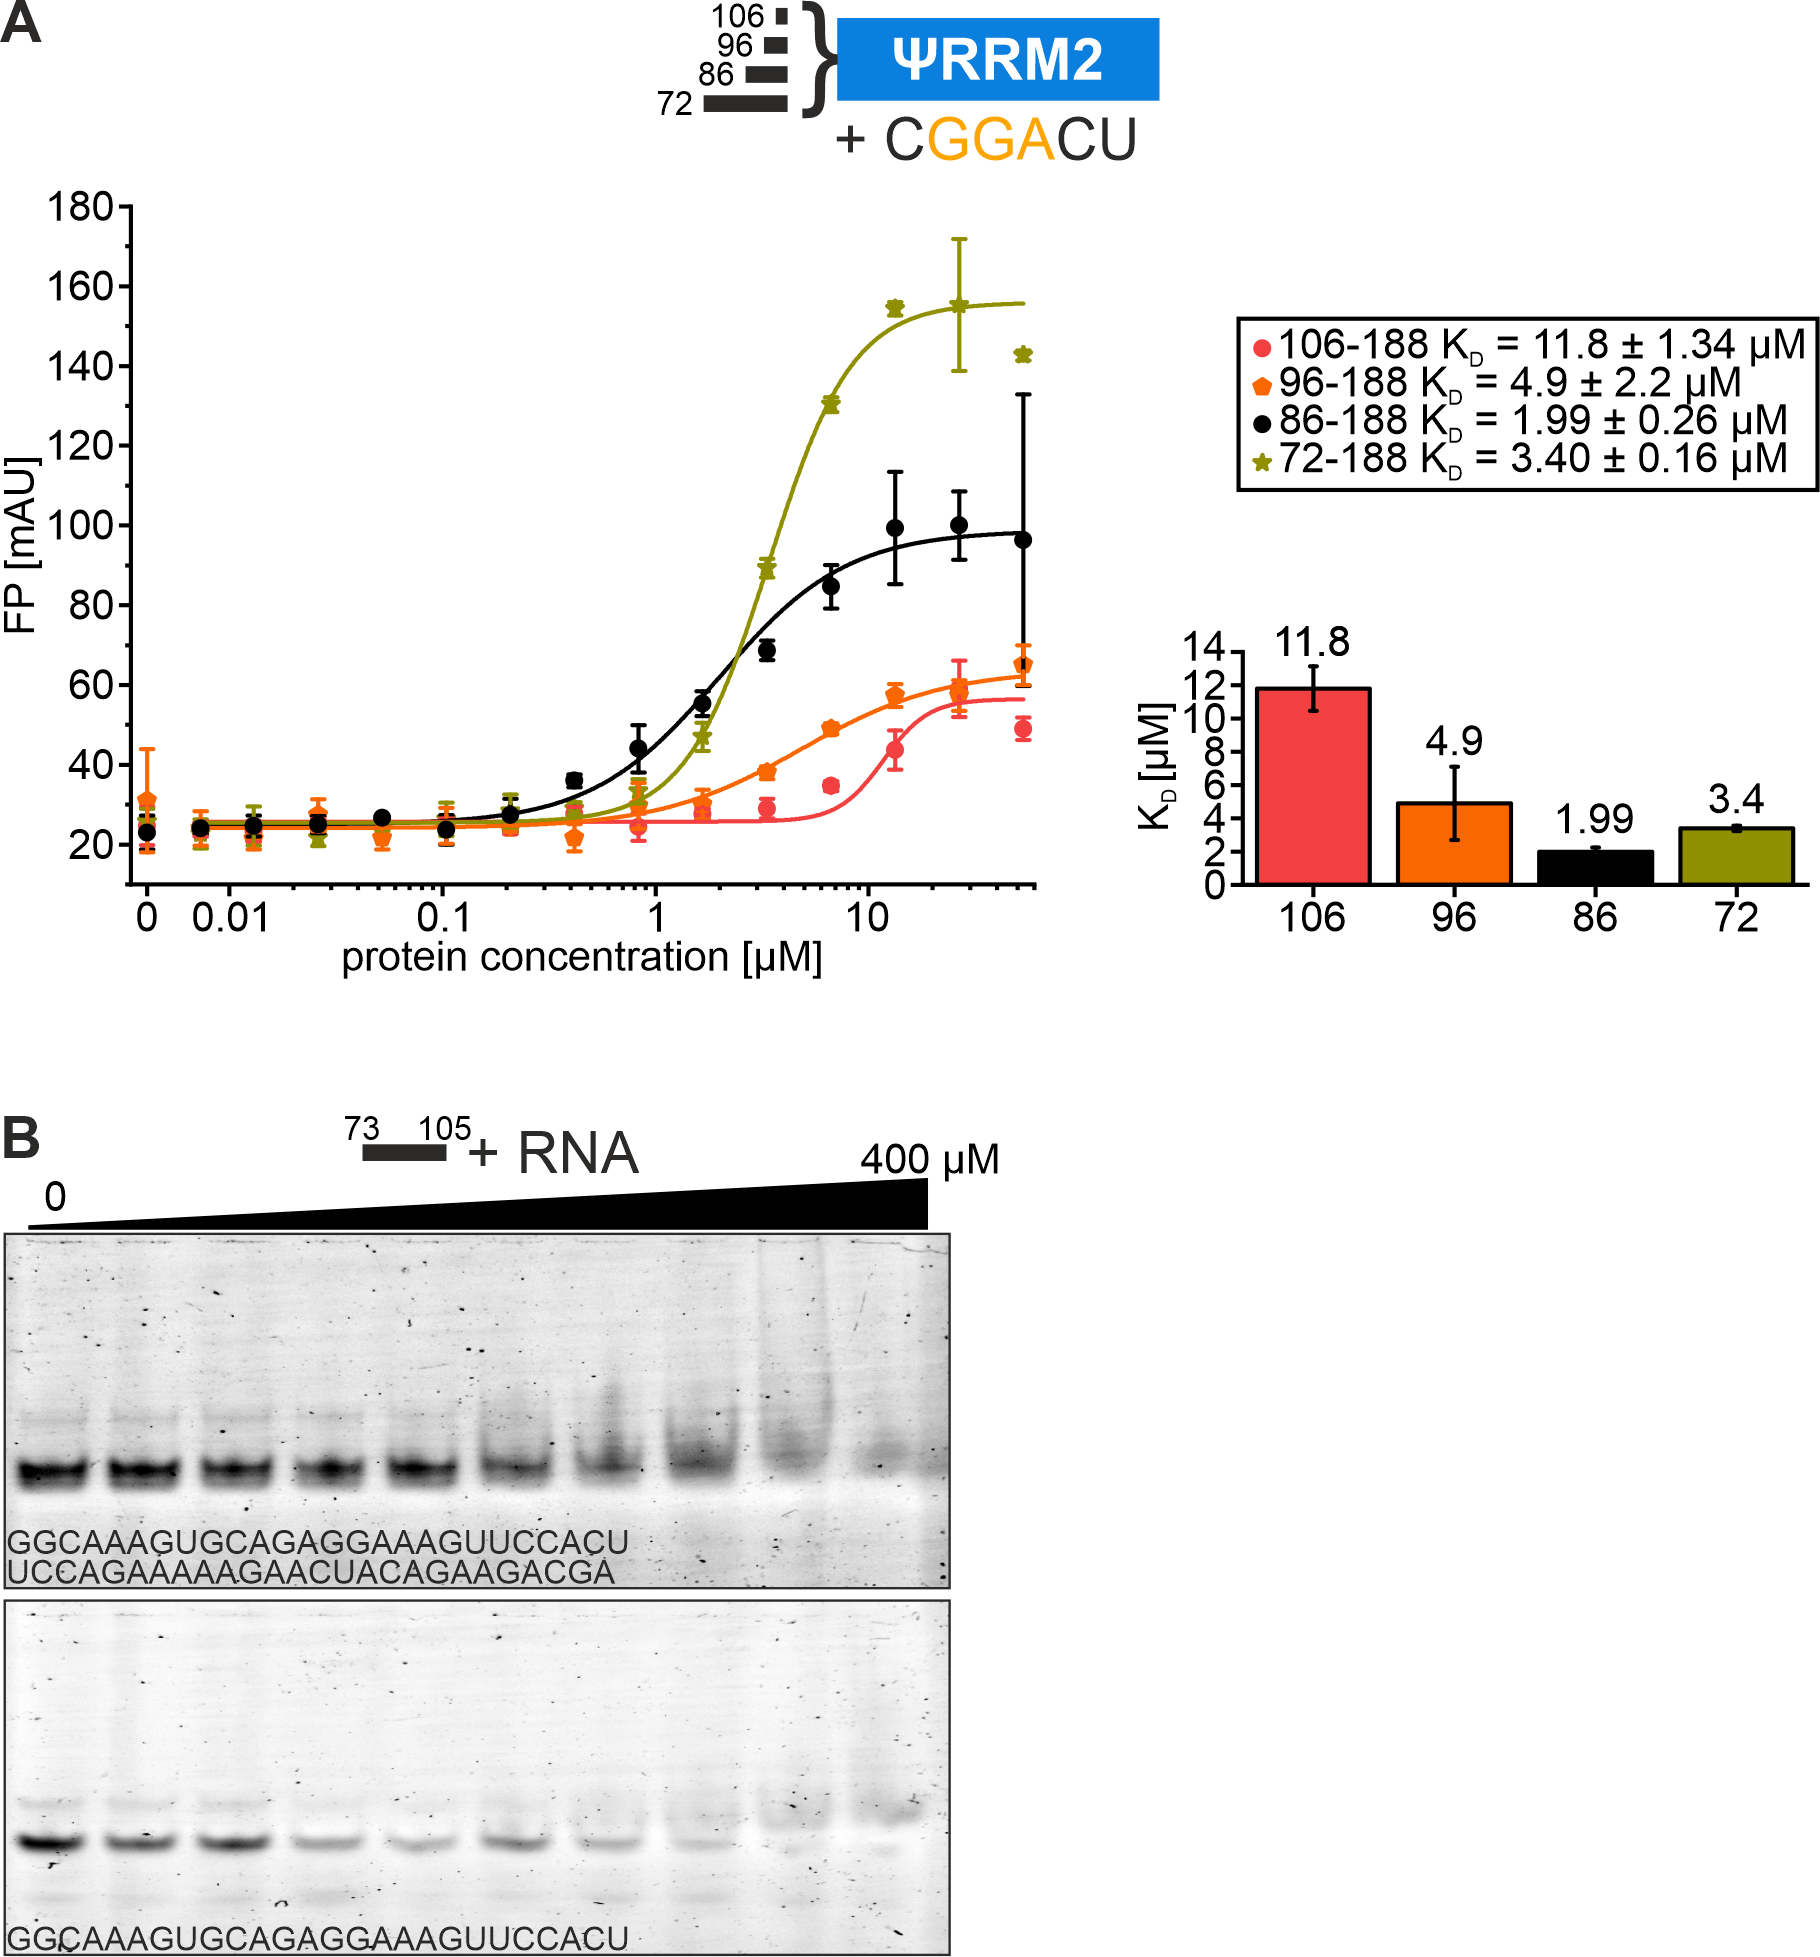


Supplementary Figure : The linker increases binding affinity of ΨRRM2.

A: FP assay of SRSF6 ΨRRM2 and different linker lengths, as indicated by icons on top, binding to Fl-CGGACU RNA. Each data point is the average from triplicate measurements shown with the standard deviation. Averaged data points are fitted with Hill1-fit in Origin 2021b from which the individual KD was derived. B: EMSAs of the linker peptide with two different RNAs. Highest peptide concentration was 400 µM with serial two-fold dilutions.


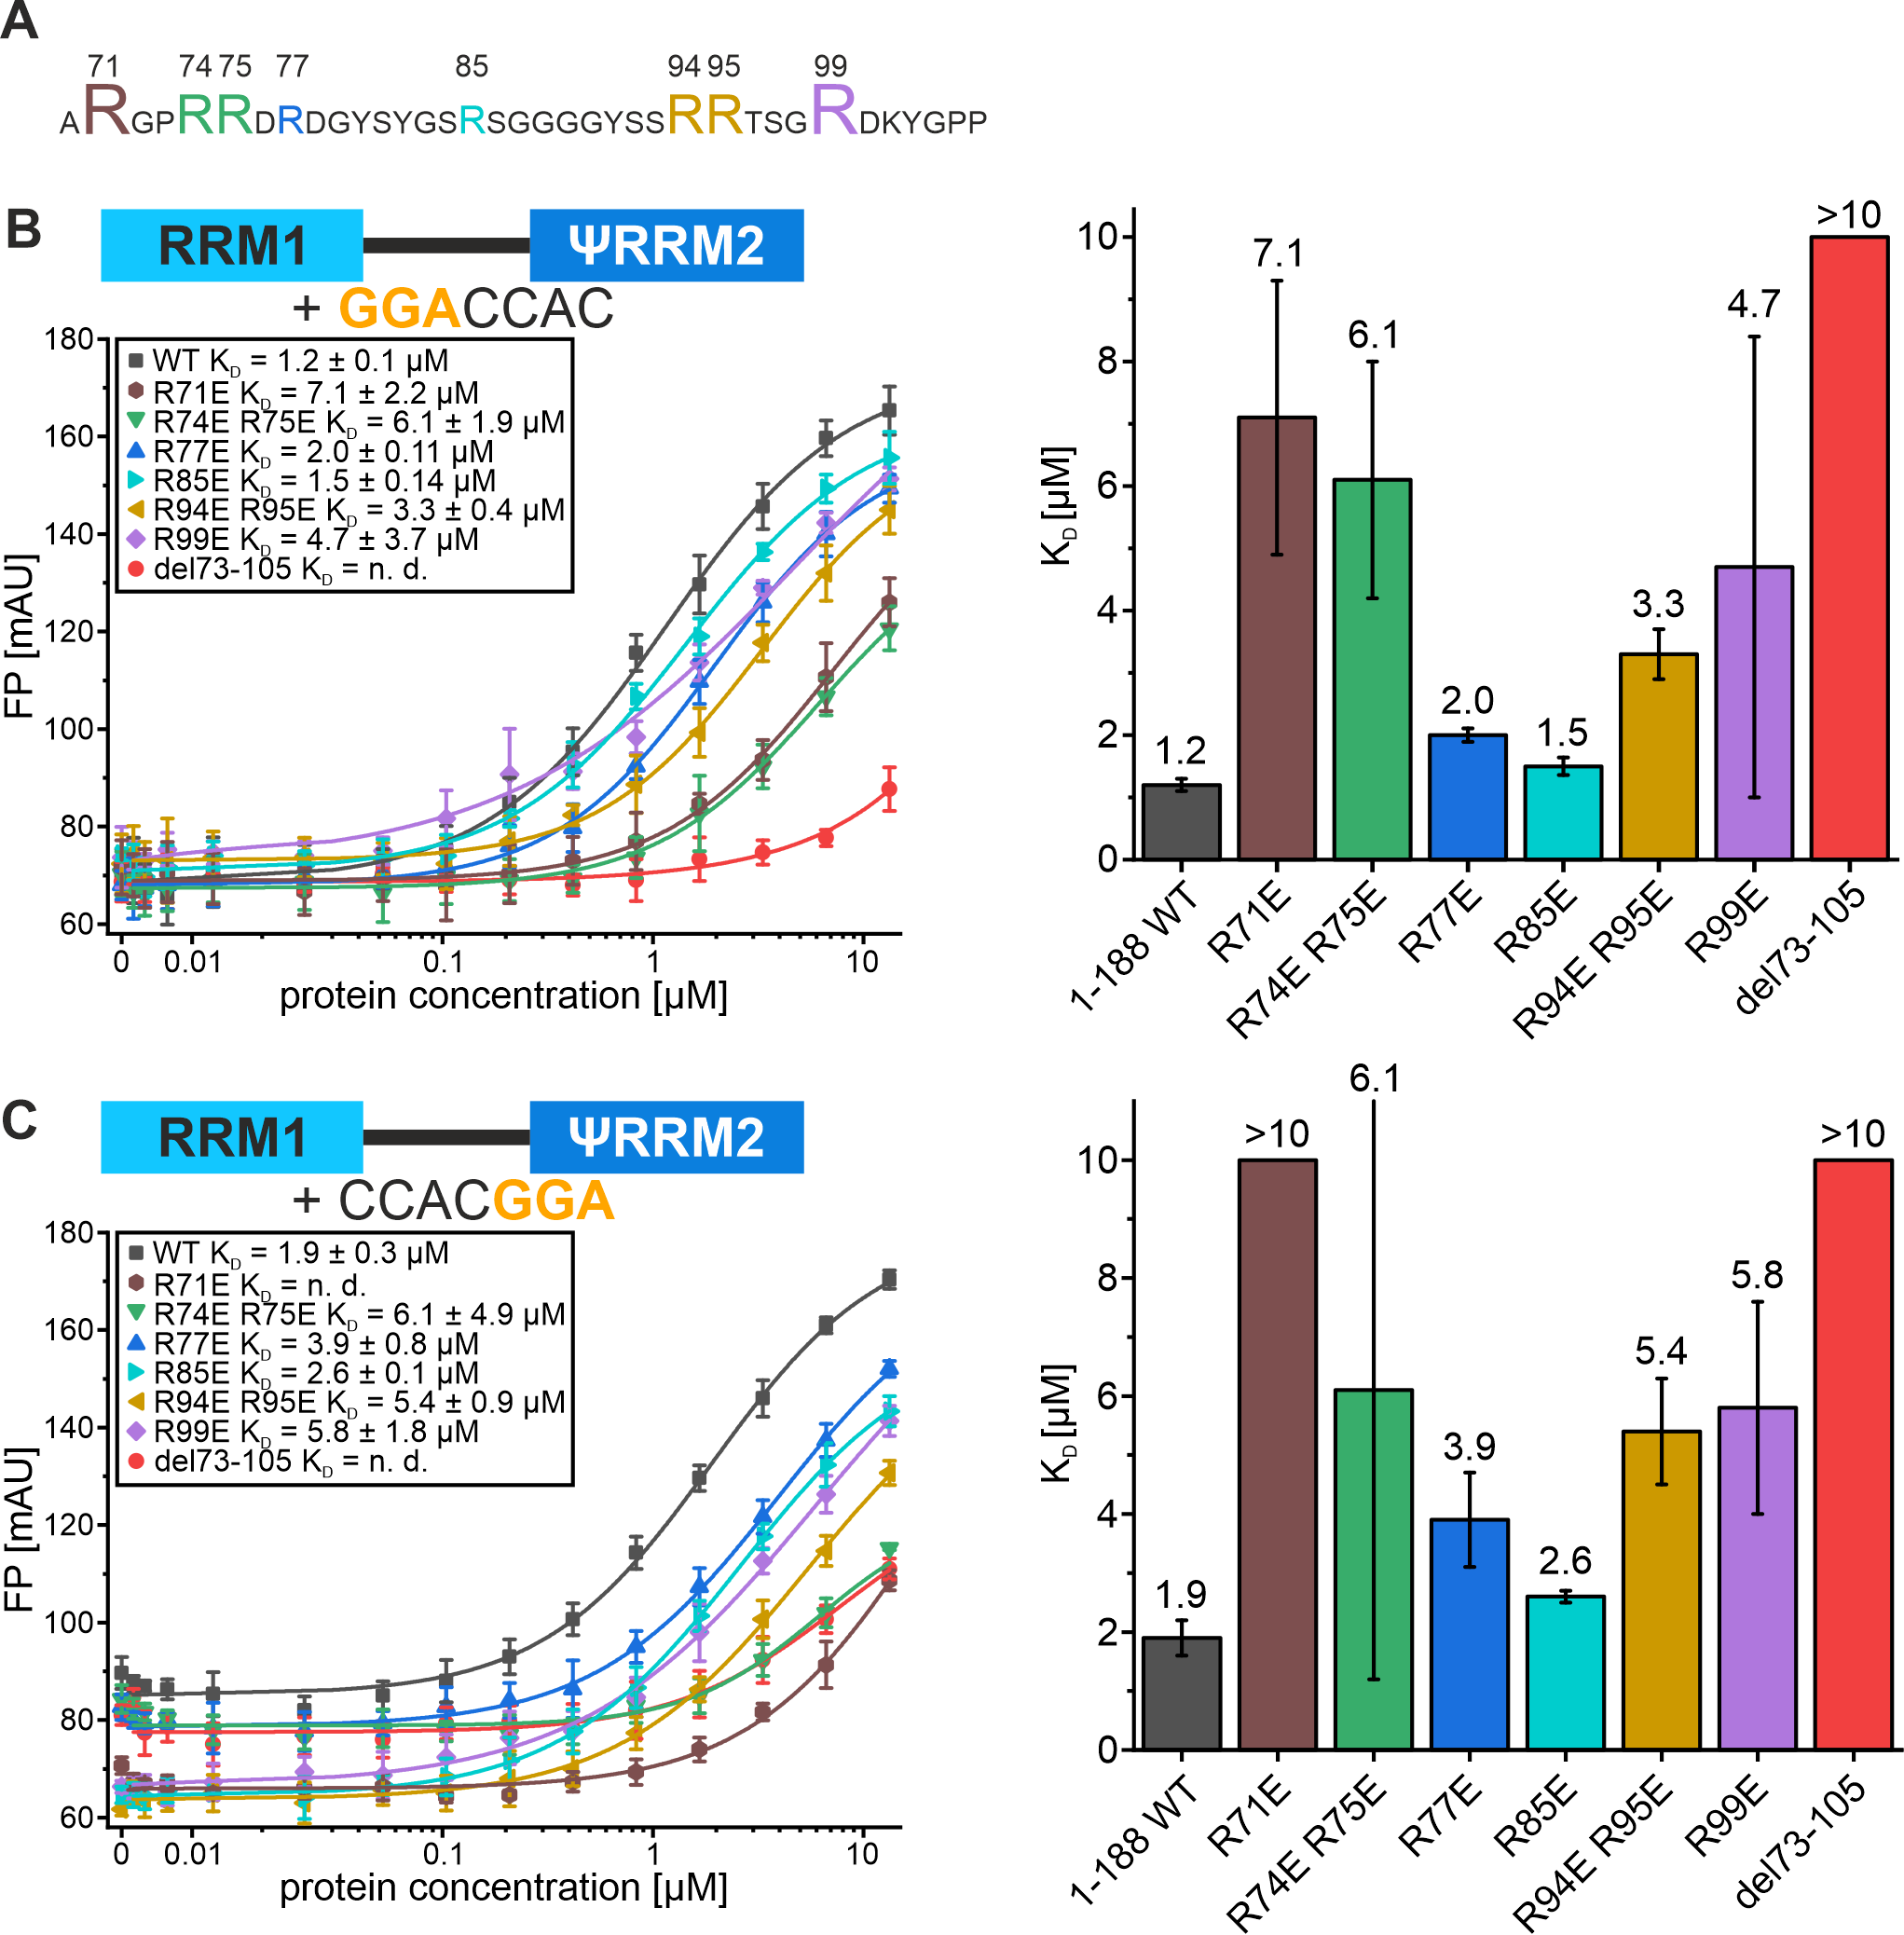


Supplementary Figure : R-to-E linker mutants in SRSF6 RRM1-2 confirm importance of single arginines for RNA-binding in inter-RRM linker.

A: Amino acid sequence of SRSF6 linker (residues 70-105). Arginines are highlighted and color-coded according to data in B-C. B-C: FP assays of tandem RRM (1-188) WT and R-to-E mutants with GGACCAC (B), CCACGGA (C) RNA. Each data point is the average from triplicate measurements shown with the standard deviation. Averaged data points are fitted with Hill1-fit in Origin 2021b from which the individual KD was derived.


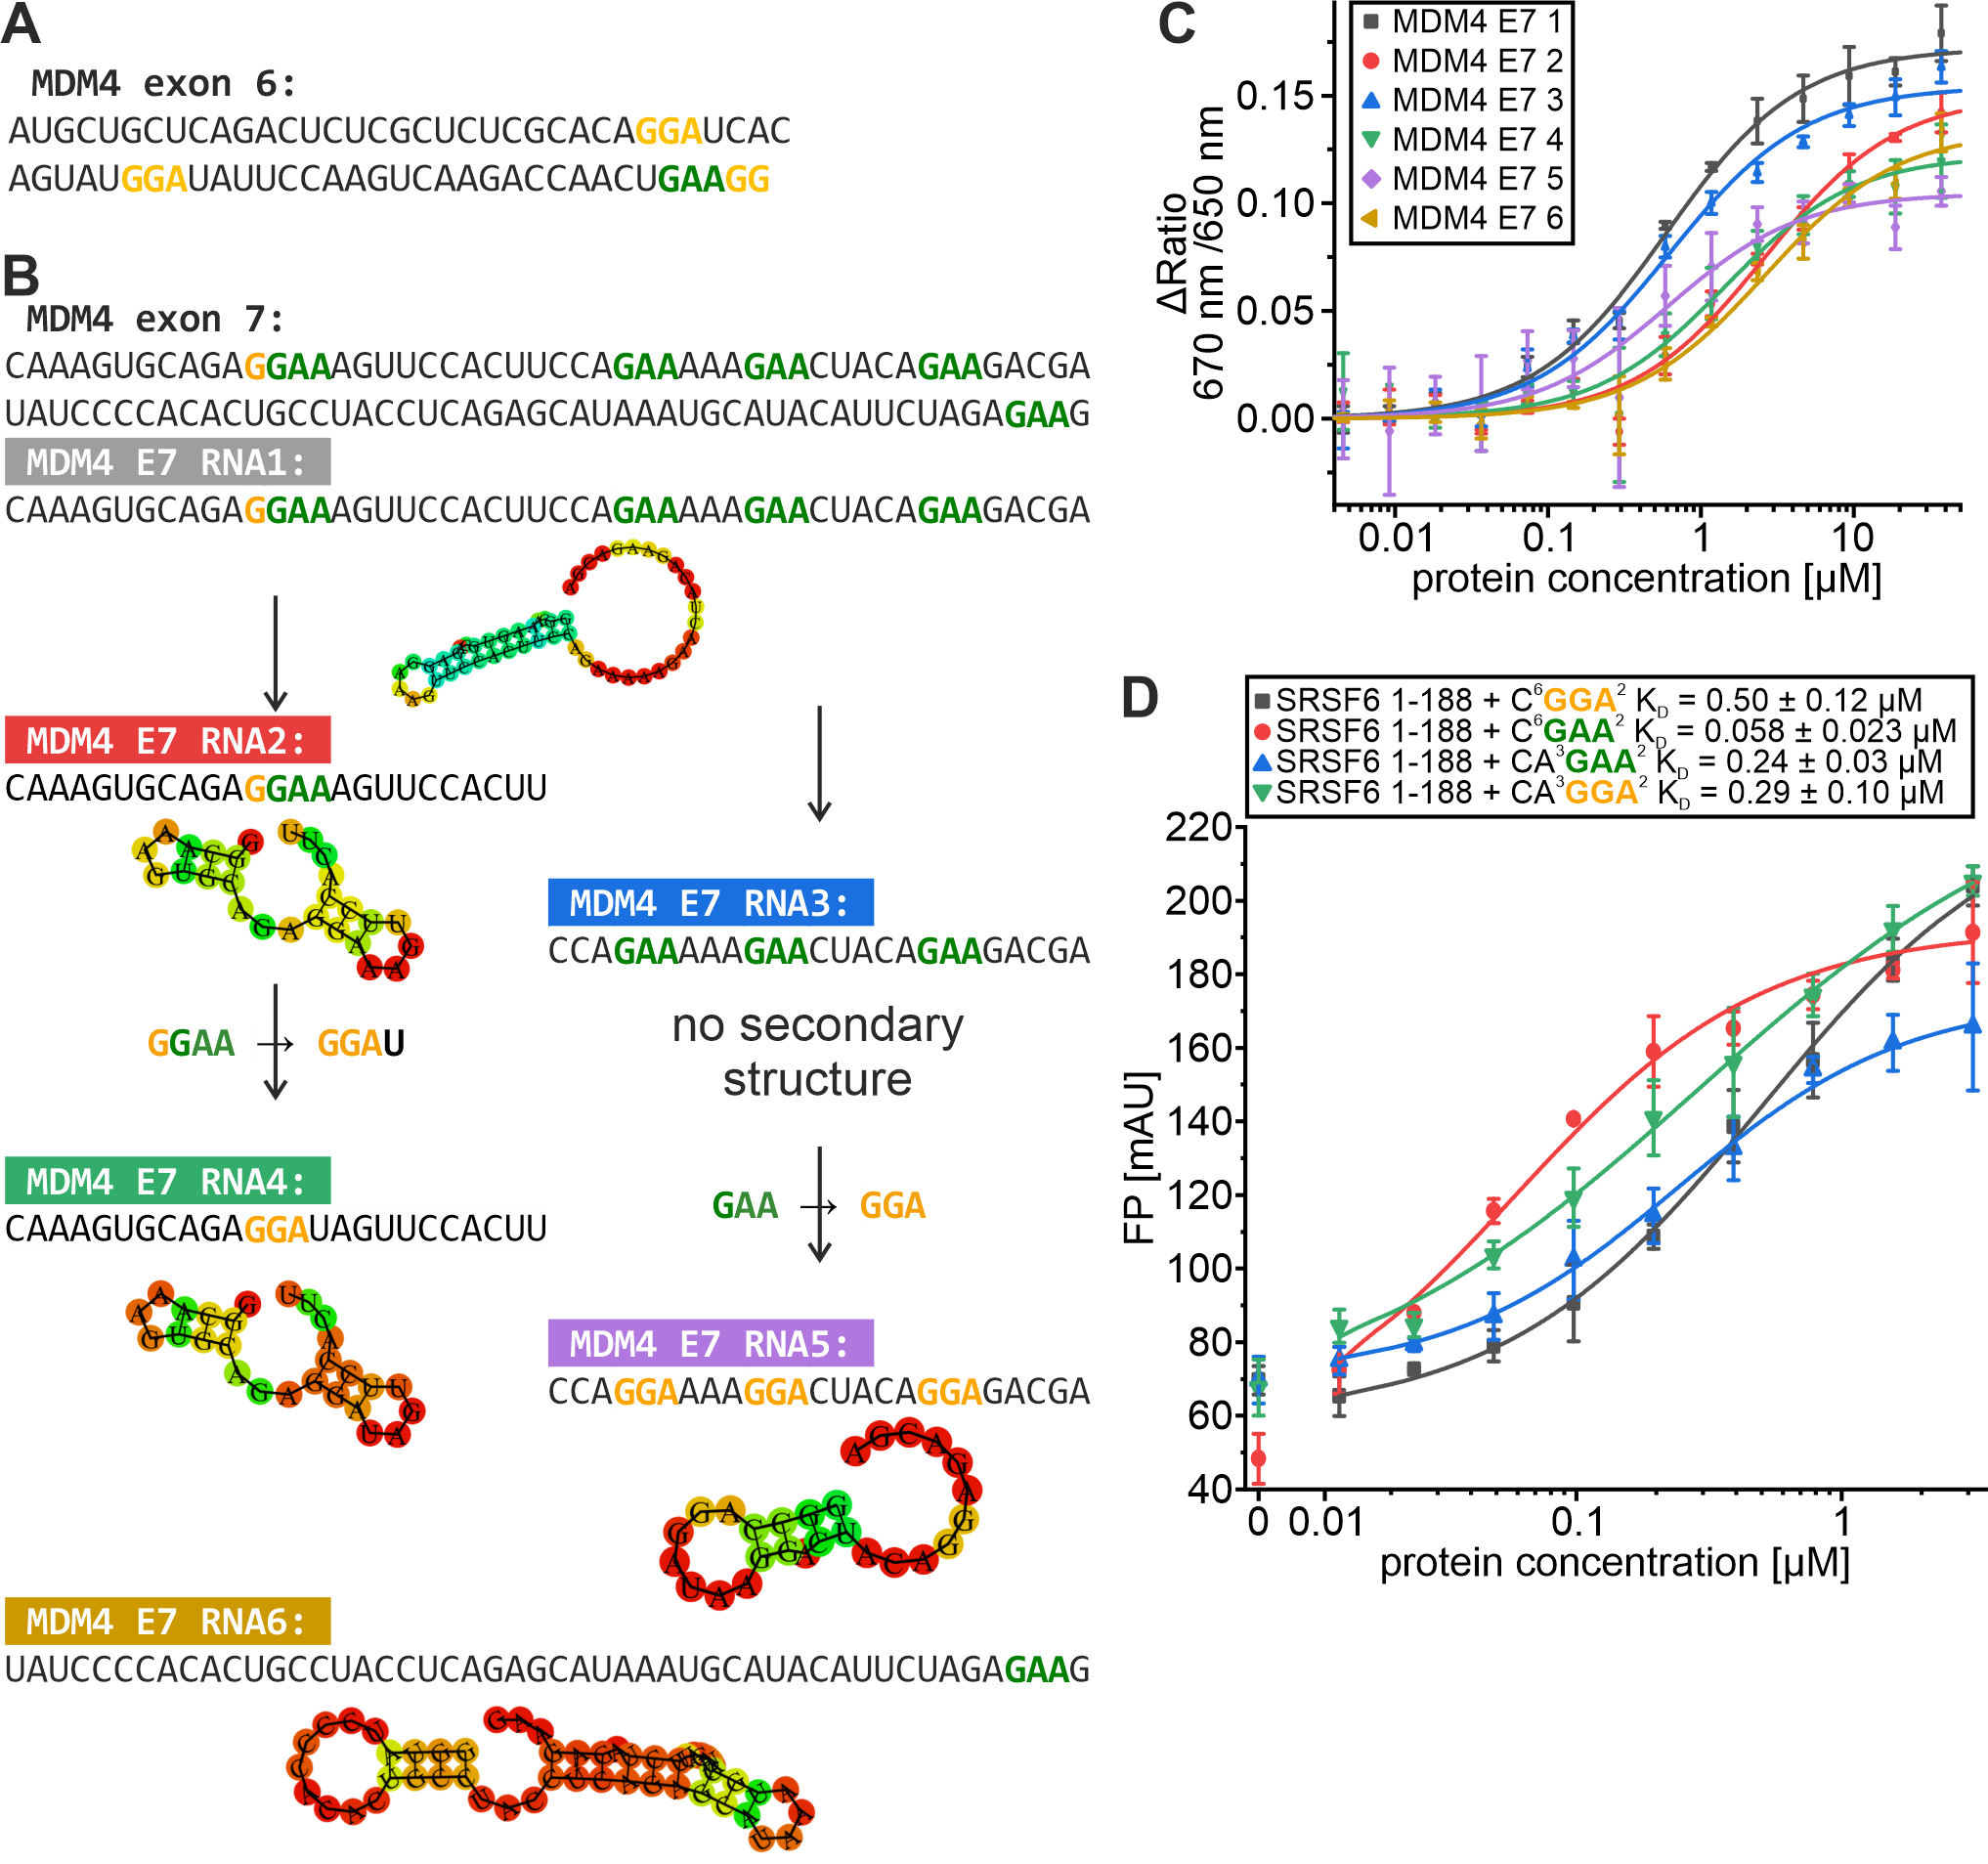


Supplementary Figure : Overview of MDM4-E6 and E7 RNA constructs with their respective secondary structure predictions.

A: Sequence of MDM4 exon 6. B: Sequence of MDM4 exon 7 and individual RNA constructs derived thereof. Mutations between constructs are highlighted with arrows. Secondary structure formation has been predicted using the RNAfold Webserver (<http://rna.tbi.univie.ac.at/> 3). C: Dual-emission spectral shift assay of tandem RRM (1-188) with six different MDM4 exon 7 RNAs. Each data point is the average from triplicate measurements shown with the standard deviation. Averaged data points are fitted with Hill1-fit in Origin 2021b from which the individual KD was derived. D: FP assay of tandem RRM (1-188) with 12-mer RNAs containing C-/CA repeats (RRM1) and GGA-/GAA-repeats. Each data point is the average from triplicate measurements shown with the standard deviation. Averaged data points are fitted with Hill1-fit in Origin 2021b from which the individual KD was derived.


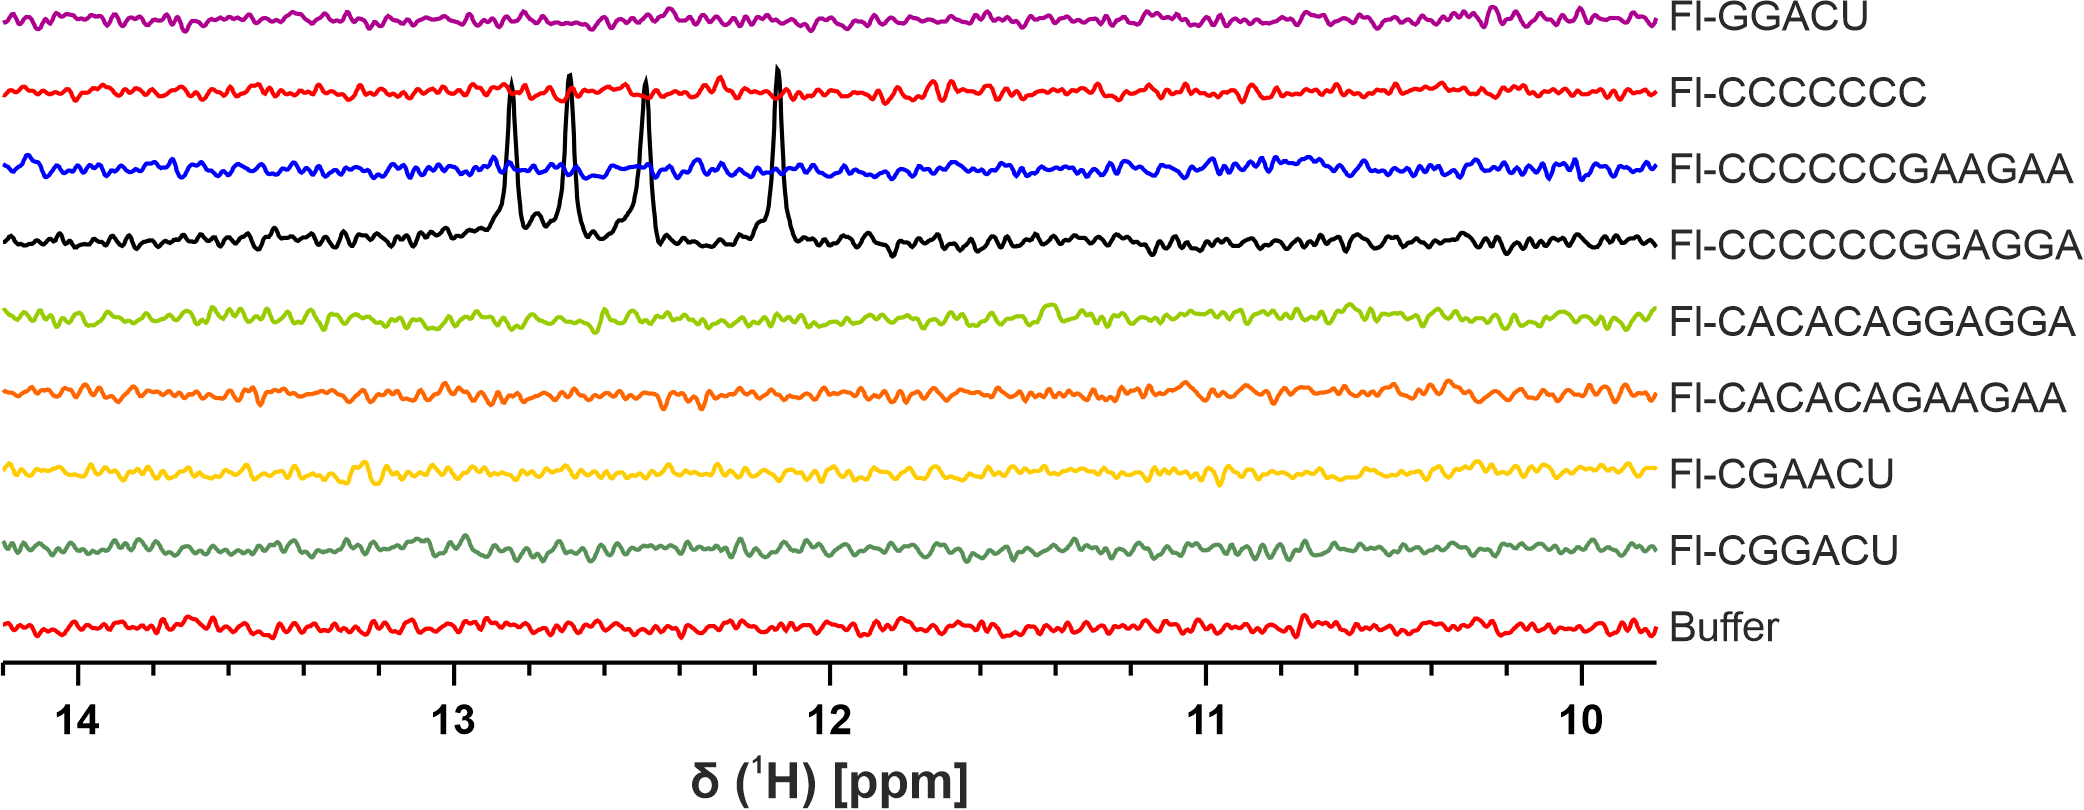


Supplementary Figure : 1H-NMR spectra of (fluorescently labeled) RNAs used for binding assays.

For each RNA the imino proton region is shown. Spectra were recorded at a 1H-Larmor frequency of 600 MHz in buffer containing 20 mM NaPi, 150 mM NaCl, 7% D2O, 100 µM DSS at pH 6.5 and 295K.


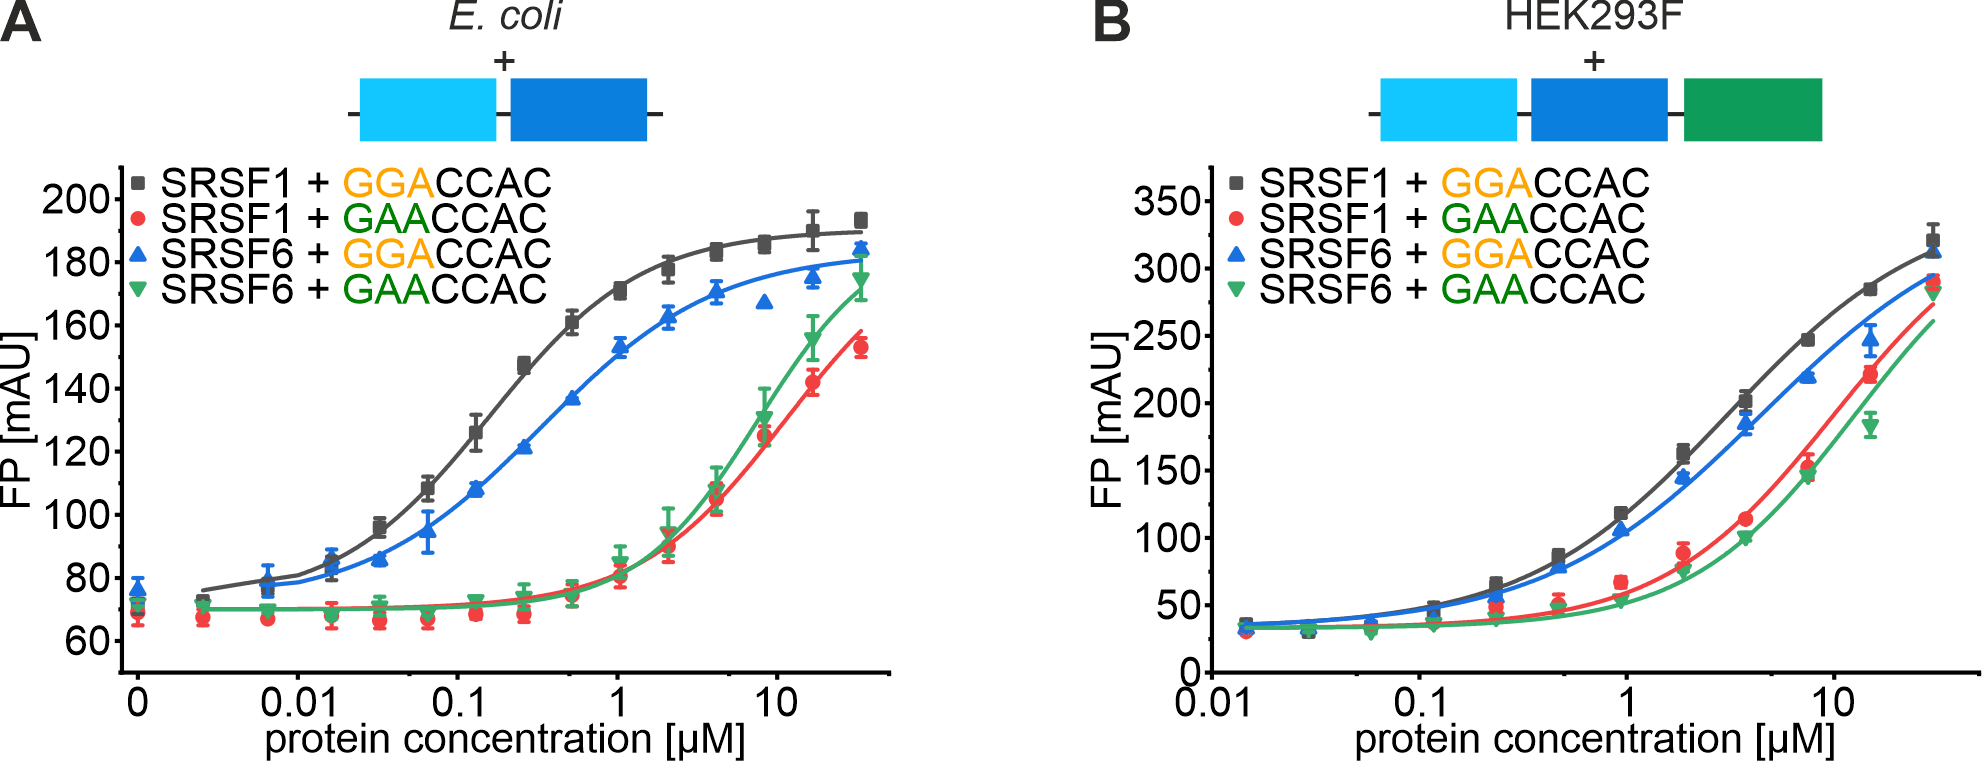


Supplementary Figure : The phosphorylated RS domain inhibits RNA binding for SRSF1/6.

FP assay of tandem RRM SRSF1 (1-199) and SRSF6 (1-188) from *E. coli* (A) or full-length SRSF1 and SRSF6 from HEK293F cells (B) each binding to GGACCAC or GAACCAC RNA. Each data point is the average from triplicate measurements shown with the standard deviation. Averaged data points are fitted with Hill1-fit in Origin 2021b from which the individual KD was derived.


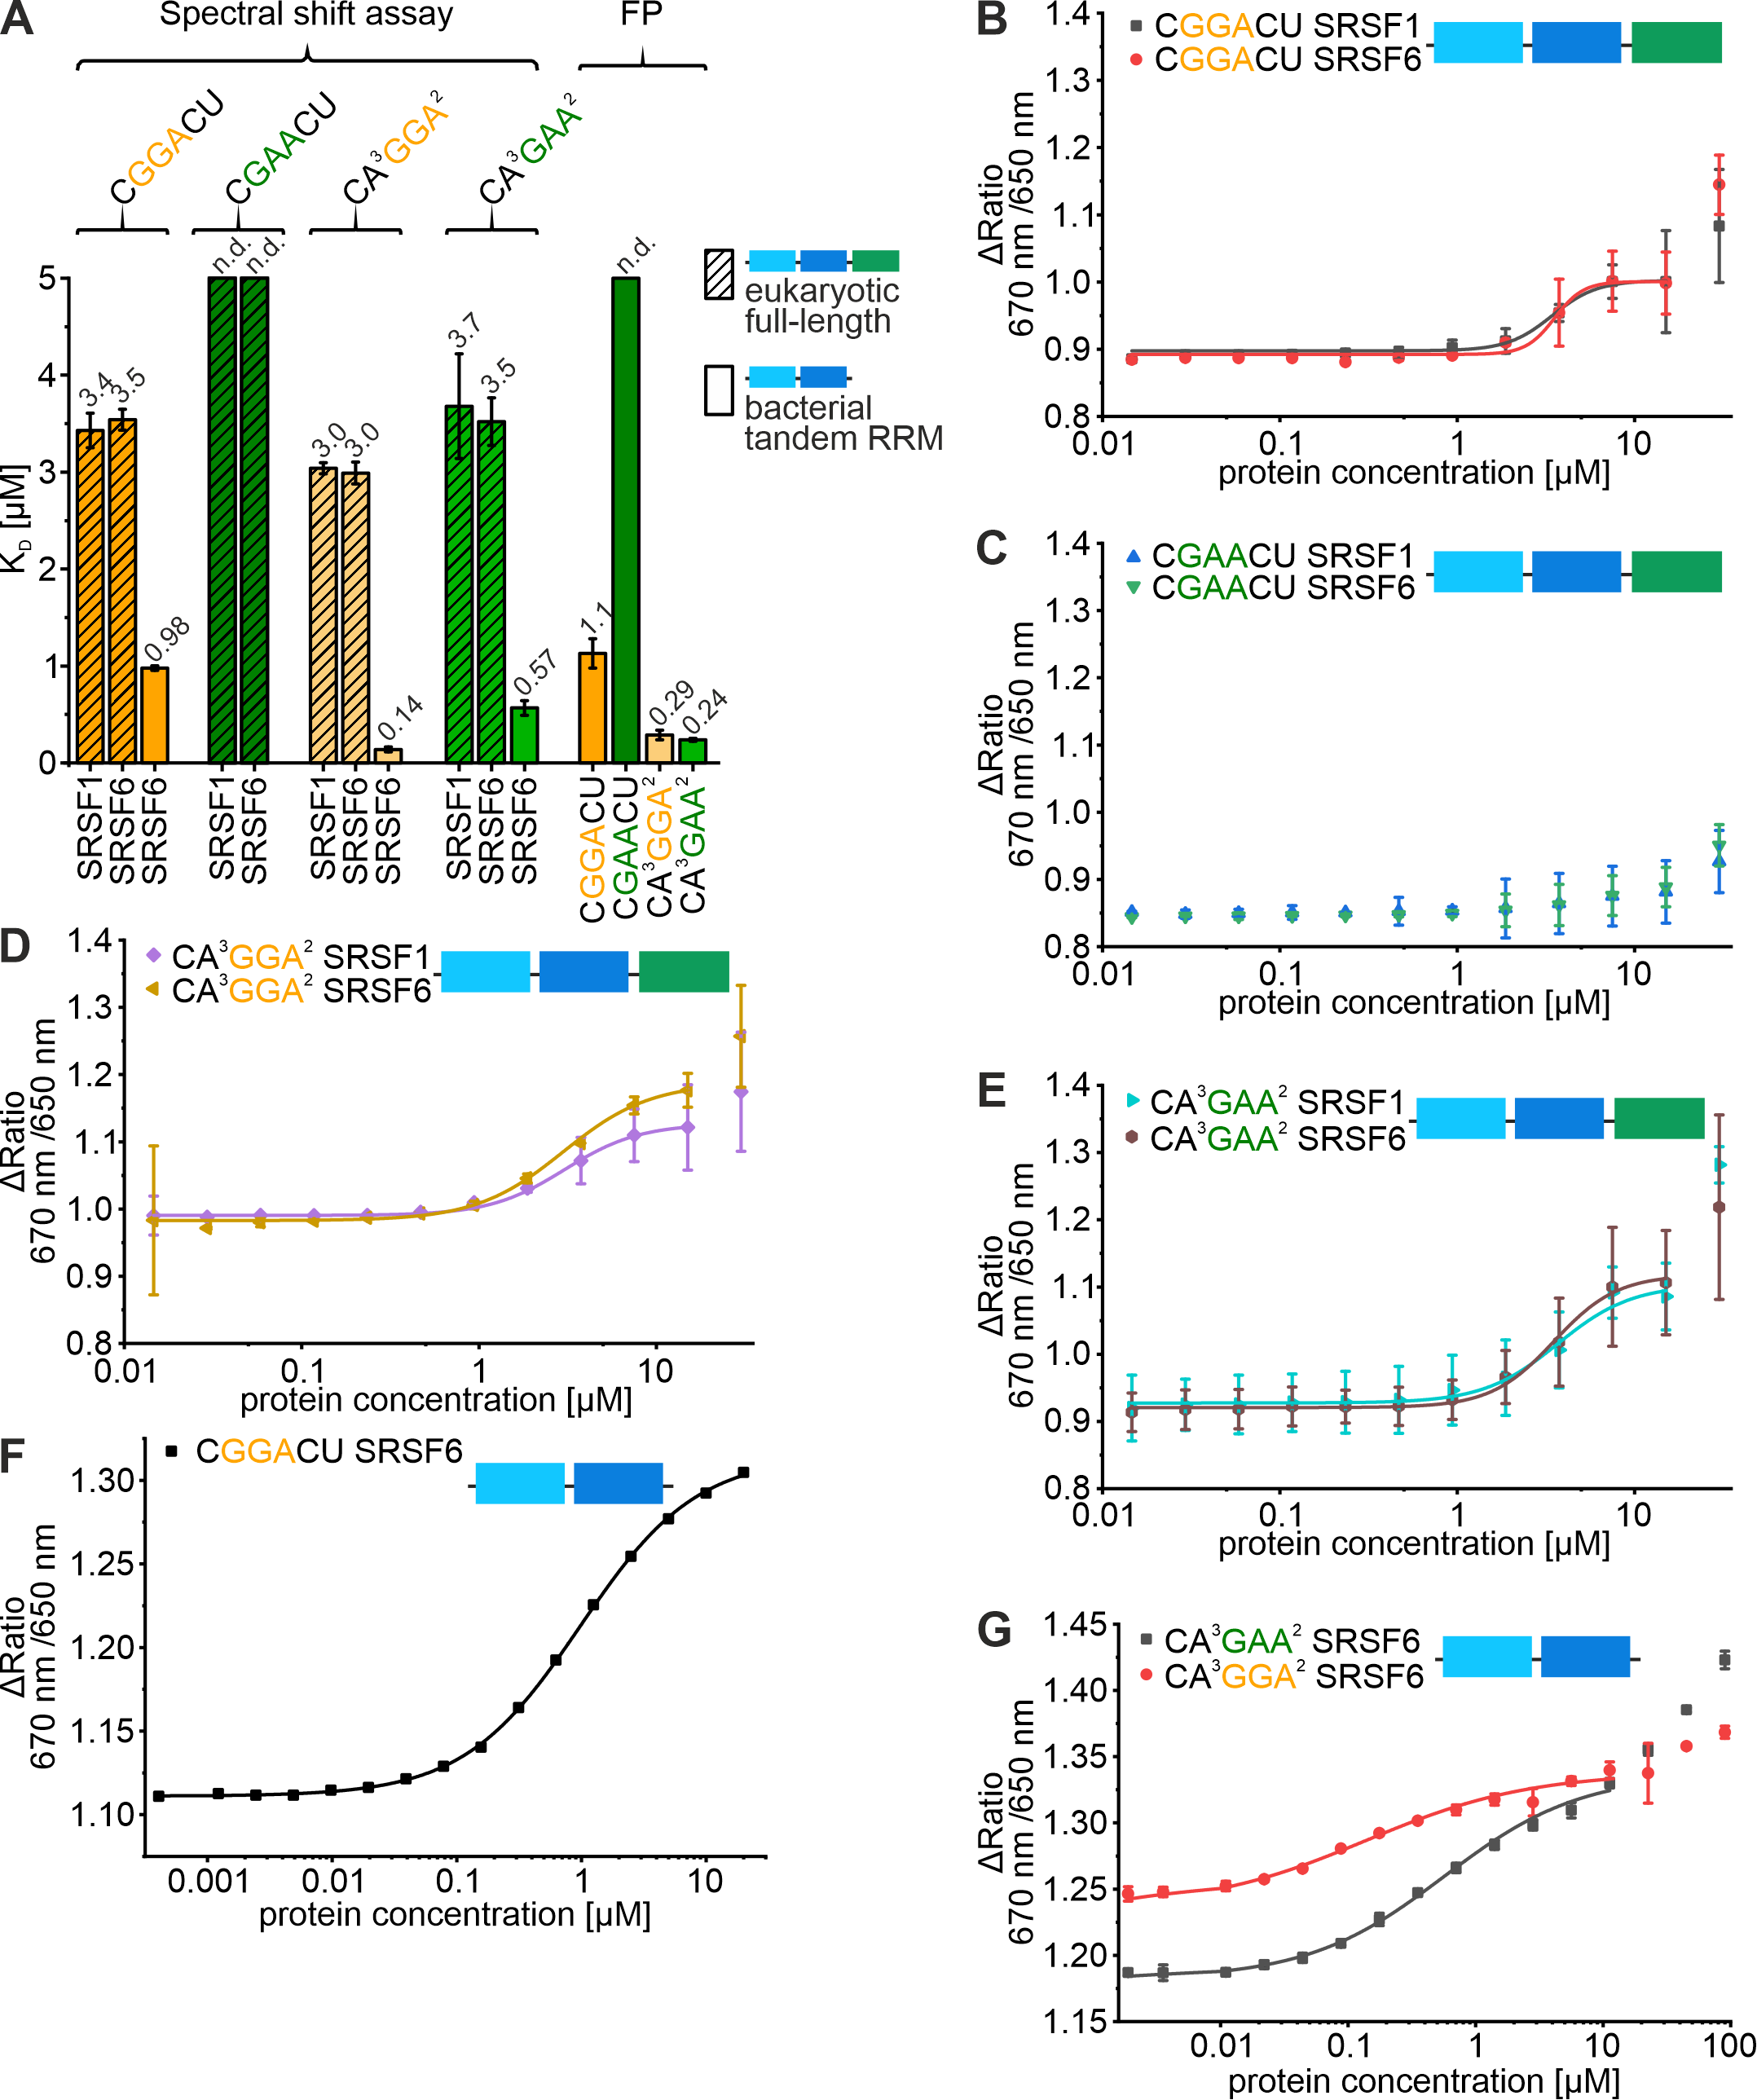


Supplementary Figure : The phosphorylated RS domain inhibits RNA binding for SRSF1/6.

A: Binding affinities of SRSF1 and SRSF6 (full-length (HEK293F) vs tandem RRM (*E. coli*), see icons on the right) with four different RNAs as indicated at the top. KD values for each combination are given above the respective bar. Affinities have been obtained from spectral shift measurements or FP measurements as indicated at the top. B-E: Spectral shift measurements for full-length (HEK293F) SRSF1 and SRSF6 to different RNAs as indicated at the top left corner of each panel. Data points have been fit where possible to obtain binding affinities plotted in A. F-G: Spectral shift measurements for tandem RRM (*E. coli*) of SRSF1 (1-199) and SRSF6 (1-188) to different RNAs as indicated at the top left corner of each panel. Data points have been fit where possible to obtain binding affinities plotted in A.


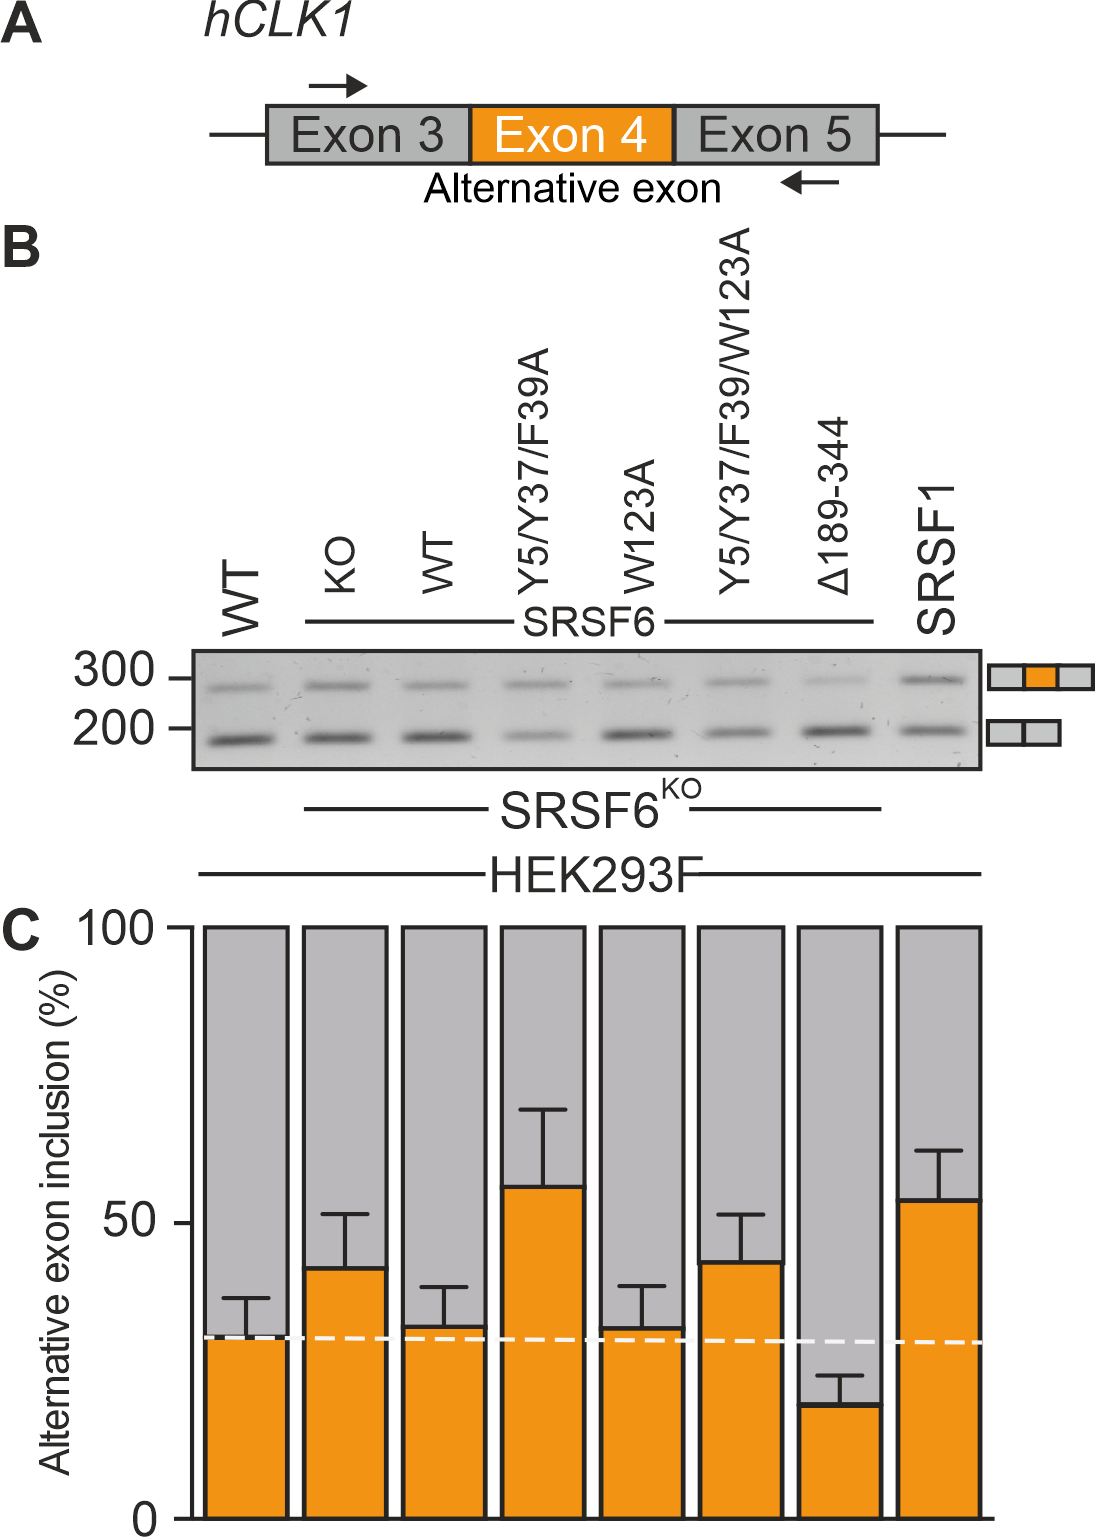


Supplementary Figure : *In vivo* splice analysis of *hCLK1*.

A: The human CLK1 (*hCLK1*) gene model shows exons E3, alternative exon E4 (orange), and E5. B: Analysis of alternative exon 4 inclusion in *hCLK1* transcripts in the indicated cell lines. Total RNA was isolated to generate cDNA used as template for the *in vivo* splice analysis. CEs that were more included are marked in orange. Semi-quantitative RT-PCR of *hCLK1* transcripts shows the expression of spliced products either including (top band representing E3-E4-E5) or skipping (lower band representing E3-E5) alternative exon 4. The PCR product was analysed on a 2% Agarose gel in TBE buffer. C: Bar graph showing the percentage of alternative exon inclusion based on densitometric analysis of the RT-PCR products. The average values from three independent biological replicates are shown, and error bars represent standard deviation. Inclusion percentage is color-coded (orange) by alternative exon inclusion level. The dotted line indicates the inclusion level in parental HEK293F cells.

# Supplementary Tables

Supplementary Table : Overview of DNA oligonucleotides used to generate different SRSF6/SRSF1 domain constructs.

| **Name** | **Sequence 5' → 3'** | **Usage** |
| --- | --- | --- |
| VE11 | GAACAGATTGGTGGTATGCCGCGCGTCTACATTGGC | amplify backbone of pET-Trx1a-SRSF6-1-188 with deletion of Trx |
| VE24 | GTGATGGTGATGGTGATGTTTC |
| VE27 | CACCATCACCATCACGGGTCCGAGGTC | amplify SUMO insert for GA |
| VE36 | ACCACCAATCTGTTCACGATGGGCC |
| VE33 | AGGAATGCCGCGCGTCTACATT | add "GAG" to pET-SUMO-SRSF6-1-188 |
| VE34 | GCTCCACCACCAATCTGTTCACGATG |
| VE122 | CGGTGGCCCATATTTGTCACGACCGG | create construct 1-105 |
| VE70 | TAAGGGTCGGGATCCGGCTGCTAACAAAGCC |
| VE78 | GTGCGTACGGAGTATCGCCTGATCG | create construct 106-188 |
| VE36 | ACCACCAATCTGTTCACGATGGGCC |
| VE35 | AGCGGGGGCGGCGGTTAT | create construct 86-188 |
| VE36 | ACCACCAATCTGTTCACGATGGGCC |
| VE153 | GGCCCTCGTCGGGATCGCGATGGG | create construct 72-188 |
| VE36 | ACCACCAATCTGTTCACGATGGGCC |
| VE160 | GCTACGGGGCCCATCAACTTTAACCC | create construct SRSF1 1-199 |
| VE161 | TAAAAGCTTGCGGCCGCACTCG |

Supplementary Table : Overview of DNA oligonucleotides used to generate mutants within SRSF6 RRM1.

Non-capital letters indicate site of mutation.

| **Name** | **Sequence 5' → 3'** | **Usage** |
| --- | --- | --- |
| VE51 | GCCGCGCGTCgcgATTGGCCGACTGTCGTAC | Y5A |
| VE52 | ATGGCCATGGCGCCCTGA |
| VE53 | TAAGAACGGTgcgGGGTTTGTCGAGTTTG | Y37A |
| VE54 | AGGTCTACCTCTAGGAGC |
| VE55 | CGGTTACGGGgcgGTCGAGTTTG | F39A |
| VE56 | TTCTTAAGGTCTACCTCTAG |
| VE64 | GGAGCATGCCgcgGGGTAACTCGAGCACC | R71A |
| VE65 | ACGATCACGCGTTCGCCG |
| VE146 | cgCGGTTACGGGTTTGTCGAGTTTGAAGATTCTCG | N35R |
| VE147 | CTTAAGGTCTACCTCTAGGAGCCTGCCATAACC |

Supplementary Table : Overview of DNA oligonucleotides used to generate mutants within SRSF6 RRM2.

Non-capital letters indicate site of mutation.

| **Name** | **Sequence 5' → 3'** | **Usage** |
| --- | --- | --- |
| VE-AH01 | gCGTGGCAGGACTTAAAGGATTTCATGCGTCAGG | S122A |
| VE-AH02 | ACAACGACTTGACAGGTTTTCAACGATCAGGC |
| VE-AH03 | gcGCAGGACTTAAAGGATTTCATGCGTCAGGCG | W123A |
| VE-AH04 | CGAACAACGACTTGACAGGTTTTCAACGATCAGG |
| VE-AH05 | gcGGACTTAAAGGATTTCATGCGTCAGGCGGG | Q124A |
| VE-AH06 | CCACGAACAACGACTTGACAGGTTTTCAACG |
| VE-AH07 | gcgTTAAAGGATTTCATGCGTCAGGCGGGCG | D125A |
| VE-AH08 | CTGCCACGAACAACGACTTGACAGG |
| VE-AH09 | gcgAAGGATTTCATGCGTCAGGCGGG | L126A |
| VE-AH10 | GTCCTGCCACGAACAACGACTTGACAGG |
| VE-AH11 | gcGGATTTCATGCGTCAGGCGGGCG | K127A |
| VE-AH12 | TAAGTCCTGCCACGAACAACGACTTGACAGG |
| VE-AH13 | gcgTTCATGCGTCAGGCGGGCGAAGTTACC | D128A |
| VE-AH14 | CTTTAAGTCCTGCCACGAACAACGACTTGACAGG |

Supplementary Table : Overview of DNA oligonucleotides used to generate point mutants within SRSF6 RRM1-RRM2 linker.

| **Name** | **Sequence 5' → 3'** | **Usage** |
| --- | --- | --- |
| VE176 | GAAGGGCCTCGTCGGGATCGCG | R71E |
| VE135 | GGCATGCTCCACGATCACGCG |
| VE175 | GAAGAGAGGCCCACGGGCATGCTCC | R74E R75E |
| VE183 | AGGCCCACGGGCATGCTCC |
| VE174 | GAAGATGGGTACTCTTACGGCAGCCGAAGC | R77E |
| VE105 | ATCCCGACGAGGCCCACGG |
| VE172 | GAAAGCGGGGGCGGCGG | R85E |
| VE173 | GCTGCCGTAAGAGTACCCATCGCGATCCC |
| VE171 | GAGGAAACTTCCGGTCGTGACAAATATGGGCC | R94E R95E |
| VE109 | TGATGAATAACCGCCGCCCCCGC |
| VE170 | GAAGACAAATATGGGCCACCGGTGCG | R99E |
| VE111 | ACCGGAAGTACGCCGTGATGAATAACCG |

Supplementary Table : Overview of DNA oligonucleotides used to generate deletion mutant of SRSF6 RRM1-RRM2 linker.

| **Name** | **Sequence 5' → 3'** | **Usage** |
| --- | --- | --- |
| VE78 | GTGCGTACGGAGTATCGCCTGATCG | V106_fw |
| VE31 | CCCACGGGCATGCTCCAC | G72_rev |

Supplementary Table : Overview of DNA oligonucleotides used to generate Twin-Strep-Tag constructs of various SRSF6 variants for RBNS.

| **Name** | **Sequence 5' → 3'** | **Usage** |
| --- | --- | --- |
| VE79 | CTTTATTTTCAGGGCAGCGCATGGAGTCATCCTCAATTCG | Strep_GA_Trx_fw |
| VE80 | GTAGACGCGCGGCATTTTTTCGAACTGCGGGTGGCTCCACGC | Strep_GA_M1_rev |
| VE81 | GAACAGATTGGTGGTAGCGCATGGAGTCATCCTCAATTCGAGAAAGG | Strep_GA_SUMO_fw |
| VE82 | ATACTCCGTACGCACTTTTTCGAACTGCGGGTGGCTCCACGC | Strep_GA_V106_rev |
| VE83 | ACCGCCGCCCCCGCTTTTTTCGAACTGCGGGTGGCTCCACGC | Strep_GA_S86_rev |
| VE76 | ATGCCGCGCGTCTACATTGGCC | M1_for |
| VE77 | GCCCTGAAAATAAAGATTCTCAGAACCACTGCC | Trx_c-term_rev |
| VE36 | ACCACCAATCTGTTCACGATGGGCC | SUMO_c-term_rev |
| VE78 | GTGCGTACGGAGTATCGCCTGATCG | V106_fw |
| VE35 | AGCGGGGGCGGCGGTTAT | S86_fw |

Supplementary Table : Overview of short RNAs used for various assays.

|  | | **Labeling** | | |  |
| --- | --- | --- | --- | --- | --- |
| **Name** | **Sequence 5' → 3'** | **-** | **Fl** | **Cy5** | **Usage** |
| 7xA | AAAAAAA | × |  |  | NMR |
| 7xC | CCCCCCC | × | × |  | NMR, FP, EMSA |
| 7xG | GGGGGGG | × |  |  | NMR |
| 7xU | UUUUUUU | × |  |  | NMR |
| CGGACU | CGGACU | × | × | × | NMR, FP, EMSA, SS, xtal |
| CGAACU | CGAACU | × | × |  | NMR, FP, EMSA |
| GGGACU | UGGGACU |  | × |  | FP, EMSA |
| AGGACU | UAGGACU |  | × |  | FP, EMSA |
| UGGACU | UUGGACU |  | × |  | FP, EMSA |
| GGACU | GGACU | × | × |  | NMR, FP, EMSA |
| UCAGGC | UCAGGC |  | × |  | FP, EMSA |
| CA2GAA | UUCAUUGAAUUU |  | × |  | FP, EMSA |
| CA2GGA | UUCAUUGGAUUU |  | × |  | FP, EMSA |
| CA5GAA | UCAUUUUUGAAU |  | × |  | FP, EMSA |
| CA5GGA | UCAUUUUUGGAU |  | × |  | FP, EMSA |
| GAA5CA | UGAAUUUUUCAU |  | × |  | FP, EMSA |
| GAA2CA | UUGAAUUCAUUU |  | × |  | FP, EMSA |
| CAGAA | UUUCAGAAUUUU |  | × |  | FP, EMSA |
| GGACCAC | UUGGACCACUUU |  | × | × | FP, EMSA, SS |
| GAACCAC | UUGAACCACUUU |  | × | × | FP, EMSA, SS |
| CCACGAA | UUCCACGAAUUU |  | × | × | FP, EMSA, SS |
| CCACGGA | UUCCACGGAUUU |  | × | × | FP, EMSA, SS |
| CCAC | UUCCACU | × | × |  | NMR, FP, EMSA |
| GAA2CCAC | UUGAAUUCCACU |  | × |  | FP, EMSA |
| GGA2CCAC | UUGGAUUCCACU |  | × |  | FP, EMSA |
| CCAC2GAA | UCCACUUGAAUU | × | × |  | NMR, FP, EMSA |
| CCAC2GGA | UCCACUUGGAUU | × | × |  | NMR, FP, EMSA |
| GGA | UUUGGAU |  | × |  | FP, EMSA |
| C6GGA2 | CCCCCCGGAGGA |  | × |  | FP, EMSA |
| C6GAA2 | CCCCCCGAAGAA |  | × |  | FP, EMSA |
| CA3GGA2 | CACACAGGAGGA | × | × | × | NMR, FP, EMSA, SS |
| CA3GAA2 | CACACAGAAGAA | × | × | × | NMR, FP, EMSA, SS |

Supplementary Table : Overview of templates for *in vitro* transcription of natural target RNAs.

| **Name** | **Sequence 5' → 3'** | **Length** |
| --- | --- | --- |
| T7-Promotor | TAATACGACTCACTATAGG | 19 |
| MDM4 E7_1 | TCGTCTTCTGTAGTTCTTTTTCTGGAAGTGGAACTTTCCTCTGCACTTTGCCTATAGTGAGTCGTATTA | 69 |
| MDM4 E7_2 | AAGTGGAACTTTCCTCTGCACTTTGCCTATAGTGAGTCGTATTA | 44 |
| MDM4 E7_3 | TCGTCTTCTGTAGTTCTTTTTCTGGCCTATAGTGAGTCGTATTA | 44 |
| MDM4 E7_4 | AAGTGGAACTATCCTCTGCACTTTGCCTATAGTGAGTCGTATTA | 44 |
| MDM4 E7_5 | TCGTCTCCTGTAGTCCTTATCCTGGCCTATAGTGAGTCGTATTA | 44 |
| MDM4 E7_6 | CTTCTCTAGAATGTATGCATTTATGCTCTGAGGTAGGCAGTGTGGGGATACCTATAGTGAGTCGTATTA | 69 |

Supplementary Table : Overview of natural target RNAs.

All RNAs have been produced in-house by *in-vitro* transcription and subsequently labeled with Fluorescein and Cy5 individually.

| **Name** | **Sequence 5' → 3'** | **Usage** |
| --- | --- | --- |
| MDM4 exon7_1 | GGCAAAGUGCAGAGGAAAGUUCCACUUCCAGAAAAAGAACUACAGAAGACGA | Fl-labelled EMSAs, Cy5-labelled SS |
| MDM4 exon7_2 | GGCAAAGUGCAGAGGAAAGUUCCACUU | Fl-labelled EMSAs, Cy5-labelled SS |
| MDM4 exon7_3 | GGCCAGAAAAAGAACUACAGAAGACGA | Fl-labelled EMSAs, Cy5-labelled SS |
| MDM4 exon7_4 | GGCAAAGUGCAGAGGAUAGUUCCACUU | Fl-labelled EMSAs, Cy5-labelled SS |
| MDM4 exon7_5 | GGCCAGGAUAAGGACUACAGGAGACGA | Fl-labelled EMSAs, Cy5-labelled SS |
| MDM4 exon7_6 | GGUAUCCCCACACUGCCUACCUCAGAGCAUAAAUGCAUACAUUCUAGAGAAG | Fl-labelled EMSAs, Cy5-labelled SS |

Supplementary Table : Proteins used in RBNS and corresponding indices used for Illumina sequencing.

| **Constructs** | **Construct Concentration(s) [µM]** | **i7 index Sequence** |
| --- | --- | --- |
| RRM1-WT (1-72) | 40 | ATCACG |
| RRM1ext (1-105) | 10 | TTAGGC |
| ψRRM2-WT (106-188) | 40 | TAGCTT |
| ψRRM2ext-WT (86-188) | 5 | GCCAAT |
| ψRRM2ext-WT (86-188) | 25 | CAGATC |
| RRM1-2-WT (1-188) | 0.5 | ACTTGA |
| RRM1-2-WT (1-188) | 5 | GATCAG |
| input control | - | GGCTAC |

Supplementary Table : Oligonucleotides used for the RBnS assay.

| **Name** | **Sequences 5' → 3'** |
| --- | --- |
| T7 promoter oligo | GTATAATACGACTCACTATAGGG |
| RBNS T7 template (20mer) | CCTTGGCACCCGAGAATTCCA(N)20GATCGTCGGACTGTAGAACTCCCTATAGTGAGTCGTATTATAC |
| RNA RT Primer (RTP) | GCCTTGGCACCCGAGAATTCCA |
| RNA PCR Primer (RP1) | AATGATACGGCGACCACCGAGATCTACACGTTCAGAGTTCTACAGTCCGACGATC |
| RNA PCR Index 1 (RPI1) | CAAGCAGAAGACGGCATACGAGAT**CGTGAT**GTGACTGGAGTTCCTTGGCACCCGAGAATTCCA |
| RNA PCR Index 2 (RPI2) | CAAGCAGAAGACGGCATACGAGAT**ACATCG**GTGACTGGAGTTCCTTGGCACCCGAGAATTCCA |
| RNA PCR Index 3 (RPI3) | CAAGCAGAAGACGGCATACGAGAT**GCCTAA**GTGACTGGAGTTCCTTGGCACCCGAGAATTCCA |
| RNA PCR Index 4 (RPI4) | CAAGCAGAAGACGGCATACGAGAT**TGGTCA**GTGACTGGAGTTCCTTGGCACCCGAGAATTCCA |
| RNA PCR Index 5 (RPI5) | CAAGCAGAAGACGGCATACGAGAT**CACTGT**GTGACTGGAGTTCCTTGGCACCCGAGAATTCCA |
| RNA PCR Index 6 (RPI6) | CAAGCAGAAGACGGCATACGAGAT**ATTGGC**GTGACTGGAGTTCCTTGGCACCCGAGAATTCCA |
| RNA PCR Index 7 (RPI7) | CAAGCAGAAGACGGCATACGAGAT**GATCTG**GTGACTGGAGTTCCTTGGCACCCGAGAATTCCA |
| RNA PCR Index 8 (RPI8) | CAAGCAGAAGACGGCATACGAGAT**TCAAGT**GTGACTGGAGTTCCTTGGCACCCGAGAATTCCA |
| RNA PCR Index 9 (RPI9) | CAAGCAGAAGACGGCATACGAGAT**CTGATC**GTGACTGGAGTTCCTTGGCACCCGAGAATTCCA |
| RNA PCR Index 10 (RPI10) | CAAGCAGAAGACGGCATACGAGAT**GTAGCC**GTGACTGGAGTTCCTTGGCACCCGAGAATTCCA |

Supplementary Table : NMR and refinement statistics for SRSF6 RRM1.

|  | **Protein** |
| --- | --- |
| **NMR distance and dihedral constraints** |  |
| Distance constraints |  |
| Total NOE | 827 |
| Intra-residue | 155 |
| Inter-residue |  |
| Sequential (|*i* – *j*| = 1) | 135 |
| Medium-range (1<|*i* – *j*| < 5) | 154 |
| Long-range (|*i* – *j*| > 5) | 383 |
| Intermolecular | 0 |
| Hydrogen bonds | 25 |
| Total dihedral angle restraints | 140 |
|  | 69 |
|  | 71 |
|  |  |
| **Structure statistics** |  |
| Violations (mean and s.d.) |  |
| Distance constraints (Å) | 0 |
| Dihedral angle constraints (º) | 0 |
| Max. dihedral angle violation (º) | 0 |
| Max. distance constraint violation (Å) | 0 |
| Deviations from idealized geometry |  |
| Bond lengths (Å) | 0.0044 ± 0.0006 |
| Bond angles (º) | 0.879 ± 0.030 |
| Impropers (º) |  |
| Average pairwise r.m.s. deviation** (Å) |  |
| Heavy | 0.94 ± 0.07 |
| Backbone | 0.24 ± 0.05 |

** Protein r.m.s deviation was calculated using residues 1 to 72 for the ensemble of 20 refined structures.

Supplementary Table : Crystal data collection and refinement statistics.

Values in parentheses are for highest resolution shell.

|  | extRRM2 WT | extRRM2 W123A | extRRM2 + C**GGA**CU |
| --- | --- | --- | --- |
| PDB ID | 9HX5 | 9HX8 | 9HX7 |
| **Data Collection** |  |  |  |
| Resolution range (Å) | 58.01 - 2.10 (2.16-2.10) | 57.22 - 2.00 (2.05-2.00) | 56.97 - 2.30 (2.38-2.30) |
| Space group | P 31 2 1 | P 31 2 1 | P 31 2 1 |
| Cell dimensions |  |  |  |
| a, b, c (Å) | 66.98, 66.98, 45.28 | 66.07, 66.07, 46.32 | 65.78, 65.78, 45.75 |
| α, β, γ (°) | 90.0, 90.0, 120.0 | 90.0, 90.0, 120.0 | 90.0, 90.0, 120.0 |
| I/σI | 11.80 (1.10) | 14.80 (1.70) | 23.70 (3.90) |
| Rmeas | 0.11 (2.54) | 0.10 (1.62) | 0.08 (1.13) |
| Rpim | 0.03 (0.58) | 0.02 (0.35) | 0.02 (0.25) |
| CC1/2 | 1.00 (0.94) | 1.00 (0.95) | 1.00 (0.98) |
| Multiplicity | 18.50 (18.60) | 19.90 (20.70) | 19.60 (20.50) |
| Completeness (%) | 99.50 (98.50) | 98.70 (99.50) | 99.90 (99.60) |
| **Refinement** |  |  |  |
| Rwork | 0.247 | 0.248 | 0.244 |
| Rfree | 0.258 | 0.259 | 0.25 |
| No. atoms |  |  |  |
| Protein | 661 | 652 | 662 |
| Water | 0 | 2 | 1 |
| Ligand | 0 | 0 | 66 |
| B-factors |  |  |  |
| Protein | 89 | 85 | 66 |
| Water | 0 | 98 | 78 |
| Ligand | 0 | 0 | 137 |
| R.m.s. deviations |  |  |  |
| Bond lengths (Å) | 0.0114 | 0.0111 | 0.0098 |
| Bond angles (°) | 1.44 | 1.41 | 1.29 |
| Ramachandran favored (%) | 100 | 100 | 97.4 |
| Ramachandran allowed (%) | 0 | 0 | 2.6 |
| Ramachandran outliers (%) | 0 | 0 | 0 |
| Rotamer outliers (%) | 0 | 0 | 0 |
| Clash score | 1.52 | 0.8 | 2.1 |
| MolProbity score | 0.89 | 0.74 | 1.1 |

Supplementary Table : Oligonucleotides used for splicing assay.

| **Name** | **Sequence 5' → 3'** | **Usage** |
| --- | --- | --- |
| hCLK1_e3_fw | CAAGGATGTGAACCTGGACATCGC | PCR |
| hCLK1_e5_rw | CTCCTTCACCTAAAGTATCAAC | PCR |
| hMDM4_Exon4_fw | ACGTCAGAGCTTCTCCGTGA | PCR |
| hMDM4_Exon8_rev | CTCAAATCCAAGGTCCAGCCT | PCR |

Supplementary Table : sg-RNA for CRISPR Knock-out of SRSF6 used in this study.

| **Species** | **Name/Target** | **Protospacer sequence** | **PAM** | **Purpose** | **Supplier** |
| --- | --- | --- | --- | --- | --- |
| Human | SRSF6_sgRNA | AACCTATGCGGATGCCCACA | cgg | NHEJ | IDT |

Supplementary Table 16: List of plasmids used or generated in this study.

| **Name** | **Resistance** | **Source** | **Species** |
| --- | --- | --- | --- |
| pSBTetBla | Ampicillin/Blasticidin | S. Sethumadhavan, Addgene #60510 | Human |
| pCAG globin pA100 SB100X | Ampicillin | S. Sethumadhavan, Addgene #127909 | - |
| pSBTet(Mod) | Ampicillin/Blasticidin | S. Sethumadhavan | Human |
| pSBTet(Mod)-SRSF6-fl | Ampicillin/Blasticidin | S. Sethumadhavan | Human |
| pSBTet(Mod)-SRSF6Y5A/Y37A/F39A | Ampicillin/Blasticidin | S. Sethumadhavan | Human |
| pSBTet(Mod)-SRSF6W123A | Ampicillin/Blasticidin | S. Sethumadhavan | Human |
| pSBTet(Mod)-SRSF6Y5A/Y37A/F39A/W123A | Ampicillin/Blasticidin | S. Sethumadhavan | Human |
| pSBTet(Mod)-SRSF1-fl | Ampicillin/Blasticidin | S. Sethumadhavan | Human |
| pSBTet(Mod)-SRSF6∆189-344 | Ampicillin/Blasticidin | S. Sethumadhavan | Human |

Supplementary Table : Oligonucleotides used for generation of full-length SRSF6 constructs.

| **Name** | **Sequence 5' → 3'** | **Usage** |
| --- | --- | --- |
| SfiII_RP common | aagcttggcctgacaggccttacttttcgaattgcgggtggctcca | Cloning |
| SRSF6_SfiI_FP | aagctggcctctgaggccaccatgccgcgcgtctacataggacgc | Cloning |
| SRSF6Y5A_RP | gttgtagctcaggcgtcctatggcgacgcgcggccatg | Mutation |
| SRSF6Y5A_FP | gtccgggagaaggacatccagcgctttttcagtggc | Mutation |
| SRSF6Y37A_RP | agtcctcgaactccacgaagccggccccatttttgaggtctaC | Mutation |
| SRSF6Y37A_FP | cccgcgacgccgacgacgccgtttac | Mutation |
| SRSF6F39A_RP | gcgggagtcctcgaactccacggcgccgtacccatttttgaggtc | Mutation |
| SRSF6F39A_FP | gacgccgacgacgccgtttacgagctgaacggc | Mutation |
| SRSF6W123A_RP | gcataaaatcctttaaatcttgcgcactgcaccgactagaaagattttc | Mutation |
| SRSF6W123A_FP | gacaagcaggtgaagtaacctatgcggatgc | Mutation |
| d189-344_FP | caagggacgctcgaagtactctttcaa | Deletion |
| d189-344_RP | agtacttcgagcgtcccttgtcgcctatggcttgtgcgtggctt | Deletion |

Supplementary Table : List of antibodies used in this study.

| **Antibody** | **Supplier** | **Catalogue number** | **Purpose** |
| --- | --- | --- | --- |
| Donkey anti-Mouse IgG-Alexa Fluor 647 antibody | Thermo Fisher | A-31571 | IF |
| NREBP (C-10; anti-human SON) antibody | Santa Cruz | sc-398508 | IF |
| Rabbit anti-SRSF6 antibody | Biozol | LS-C290327 | WB |
| beta-Actin Monoclonal antibody | Thermo Fisher | (AC-15) M4302 | WB |
| Donkey Anti-Rabbit HRP conjugate antibody | Millipore Sigma | AP182P | WB |
| Donkey anti-Mouse HRP conjugate antibody | Thermo Fisher | A16011 | WB |

Supplementary Table 19: List of cell lines used or generated in this study.

| **Name** | **Selection** | **Source** | **Species** |
| --- | --- | --- | --- |
| HEK293F WT | - | Thermo Fischer | Human |
| HEK293F SRSF6KO | Blasticidin | S. Sethumadhevan / This work | Human |
| HEK293F KO SRSF6-fl | Blasticidin | S. Sethumadhevan / This work | Human |
| HEK293F KO SRSF6 Y5A/Y37A/F39A | Blasticidin | S. Sethumadhevan / This work | Human |
| HEK293F KO SRSF6 W123A | Blasticidin | S. Sethumadhevan / This work | Human |
| HEK293F KO SRSF6Y5A/Y37A/F39A/W123A | Blasticidin | S. Sethumadhevan / This work | Human |
| HEK293F KO SRSF6∆189-344 | Blasticidin | S. Sethumadhevan / This work | Human |
| HEK293F WT SRSF1-fl | Blasticidin | S. Sethumadhevan / This work | Human |
| HEK293F WT SRSF6-fl | Blasticidin | S. Sethumadhevan / This work | Human |

Supplementary Table : Overview of Rg, Dmax and Chi2 from SAXS-based models.

|  | **Model** | **Rg [nm]** | **Dmax [nm]** | **χ2** |
| --- | --- | --- | --- | --- |
| **apo** | m1058 | 2.56 | 7.86 | 2.26 |
| m3792 | 2.55 | 8.08 | 2.28 |
| m1449 | 2.57 | 8.34 | 2.36 |
| m2807 | 2.52 | 8.07 | 2.36 |
| m1317 | 2.43 | 7.65 | 2.48 |
| m1125 | 2.53 | 8.07 | 2.5 |
| m0057 | 2.46 | 8.01 | 2.6 |
| m3074 | 2.5 | 8.03 | 2.68 |
| m4213 | 2.42 | 7.58 | 2.79 |
| m3675 | 2.57 | 8.22 | 2.84 |
| average | 2.51 | 7.99 | 2.52 |
| **RNP** | m1170 | 2.51 | 8.68 | 2.32 |
| m1764 | 2.61 | 9.35 | 2.37 |
| m1713 | 2.51 | 9.08 | 2.38 |
| m2227 | 2.48 | 9.14 | 2.41 |
| m0416 | 2.56 | 9.25 | 2.47 |
| m1209 | 2.52 | 9.17 | 2.55 |
| m0353 | 2.52 | 8.76 | 2.57 |
| m0046 | 2.47 | 8.55 | 2.62 |
| m2026 | 2.56 | 8.54 | 2.7 |
| m4609 | 2.56 | 9.52 | 2.72 |
| average | 2.53 | 9 | 2.51 |

References

1. von Ehr, J. & Schlundt, A. 1H, 13C, 15N backbone chemical shift assignments and relaxation analysis of the single and tandem RRMs of the human serine-arginine rich splicing factor 6 (SRSF6). *Journal of Magnetic Resonance,* 108079; 10.1016/j.jmr.2026.108079 (2026).

2. Barthels, F., Schirmeister, T. & Kersten, C. BANΔIT: B'-Factor Analysis for Drug Design and Structural Biology. *Molecular informatics* **40,** e2000144; 10.1002/minf.202000144 (2021).

3. Gruber, A. R., Lorenz, R., Bernhart, S. H., Neuböck, R. & Hofacker, I. L. The Vienna RNA websuite. *Nucleic Acids Res* **36,** W70-4; 10.1093/nar/gkn188 (2008).
